# Supplementary material for: Brønsted acid-catalyzed α-halogenation of ynamides from halogenated solvents and pyridine-N-oxides
Source: Royal Society of Chemistry journal article supplement (doi:10.1039/c6cc10286g), 2017-01-01

# Brønsted Acid-Catalyzed $\alpha$ -Halogenation of Ynamides from Halogenated Solvents and Pyridine-*N*-Oxides

Seung Woo Kim, Tae-Woong Um, Seunghoon Shin\*

Department of Chemistry and Center for New Directions in Organic Synthesis, Research Institute for Natural Sciences, Hanyang University, 222 Wangsimni-ro, Seongdong-gu, Seoul, 133-791, Korea

*sshin@hanyang.ac.kr*

## Table of Contents

|                                                                                     |     |
|-------------------------------------------------------------------------------------|-----|
| 1. General Information-----                                                         | S2  |
| 2. Optimization Study-----                                                          | S2  |
| 3. Kinetic Study-----                                                               | S3  |
| 4. Halide Test-----                                                                 | S7  |
| 5. General Procedure-----                                                           | S8  |
| 6. Mechanistic Studies-----                                                         | S8  |
| 7. Characterization of Substrates and Products-----                                 | S9  |
| Appendix: <sup>1</sup> H and <sup>13</sup> C NMR spectra for all new compounds----- | S17 |

## 1. General Information

All solvents were dried and distilled according to standard methods before use.<sup>1</sup> Pyridine-*N*-oxides<sup>2</sup> and ynamides<sup>3</sup> were prepared according to the literature procedures. Ynamides were prepared according to the literature. All other chemicals were purchased from commercial sources and was used as received. TLC (thin-layer chromatography) analysis was carried out on Merck silica gel 60 F254 TLC plates and was visualized with UV lamp and KMnO<sub>4</sub> solution. Flash chromatography was performed on Kieselgel 60 (230-400 mesh). <sup>1</sup>H and <sup>13</sup>C NMR spectra were recorded on a Varian (400 MHz) or Bruker (400 MHz) spectrometer with TMS as an internal standard. High resolution mass spectra (HRMS) were obtained from Korea Basic Science Institute (KBSI, Daegu).

## 2. Optimization Study

Table S1. Screening of Acid Catalysts<sup>a</sup>

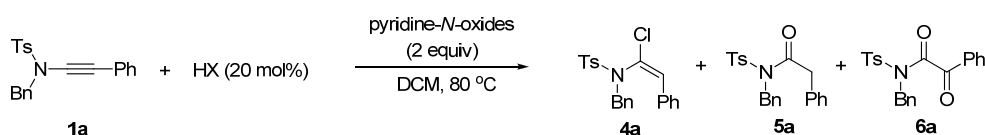

| entry | HX                                                                                                            | time | yield (%) <sup>b</sup> (4a/5a/6a) |    |    |
|-------|---------------------------------------------------------------------------------------------------------------|------|-----------------------------------|----|----|
| 1     |                                                                                                               | 60 h | 69                                | 8  | -  |
| 2     | <br>( <i>S</i> )-TCyP (Ar = 2,4,6-( <i>n</i> -Hex) <sub>3</sub> C <sub>6</sub> H <sub>2</sub> )<br>(10 mol %) | 60 h | 48                                | -  | -  |
| 3     | MsOH                                                                                                          | 28 h | -                                 | 15 | 85 |
| 4     | CSA <sup>b</sup>                                                                                              | 72 h | (messy)                           | -  | -  |
| 5     | citric acid                                                                                                   | 80 h | 59                                | 40 | -  |
| 6     | PhCOOH                                                                                                        | 80 h | 83                                | 7  | -  |
| 7     | HCOOH                                                                                                         | 60 h | 46                                | 22 | -  |
| 8     | lactic acid                                                                                                   | 60 h | 30                                | 30 | -  |
| 9     | PPTS                                                                                                          | 60 h | 28                                | -  | 27 |
| 10    | 4- nitrophenol                                                                                                | 60 h | 37                                | -  | -  |

<sup>a</sup>All reactions were conducted in CH<sub>2</sub>Cl<sub>2</sub> (0.1 M); Yields were determined based on the <sup>1</sup>H NMR spectra with CH<sub>2</sub>Br<sub>2</sub> as an internal standard. <sup>b</sup>CSA: (1*S*)-(+)-10-camphorsulfonic acid. <sup>c</sup>PPTS: pyridinium *p*-toluenesulfonate.

<sup>1</sup> Armarego, W. L. F.; Chai, C. L. L. *Purification of Laboratory Chemicals*; Elsevier: Oxford, **2009**.

<sup>2</sup> (a) Kokatla, H. P.; Thomson, P. F.; Bae, S.; Doddi, V. R.; Lakshman, M. K. *J. Org. Chem.* **2011**, *76*, 7842. (b) Bering, L.; Antonchick, A. P.; *Org. Lett.* **2015**, *17*, 3134.

<sup>3</sup> Alexandre, H.; Pascal, R.; Vincent, G.; Kevin, C.; Robert H. D. *Angew. Chem., Int. Ed.* **2014**, *53*, 8333.

**Table S2. Screening of *N*-Oxides**

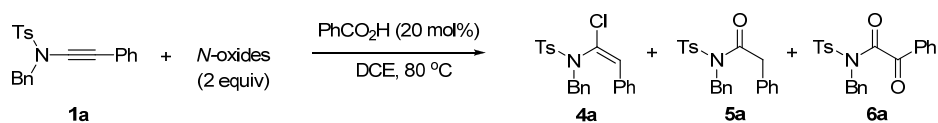

| entry | <i>N</i> -oxides                               | time | yield (%) <sup>b</sup> ( <b>4a</b> / <b>5a</b> / <b>6a</b> ) |    |    |
|-------|------------------------------------------------|------|--------------------------------------------------------------|----|----|
| 1     |                                                | 70 h | 92(89)                                                       | -  | -  |
| 2     |                                                | 36 h | 76 (73)                                                      | 12 | 12 |
| 3     |                                                | 65 h | 59                                                           | 13 | 34 |
| 4     |                                                | 60 h | 53                                                           | 7  | 19 |
| 5     |                                                | 15 h | -                                                            | -  | -  |
| 6     |                                                | 65 h | 32                                                           | 20 | 25 |
| 7     |                                                | 70 h | trace (messy)                                                | -  | -  |
| 8     |                                                | 70 h | trace (messy)                                                | -  | -  |
| 9     | Ph <sub>3</sub> P=O                            | 40 h | -                                                            | -  | -  |
| 10    | Me <sub>3</sub> N <sup>+</sup> -O <sup>-</sup> | 15 h | 26                                                           | -  | -  |

### 3. Kinetic Study

Initially, the efficiency of conversion of **1a** into **4a** was inspected varying amount of pyridine-*N*-oxide **2**. Trends in Table S3 shows that the amount of **2** had relatively negligible effect on the formation of side products **5a** and **6a**, but the trend in the reaction time for consumption of starting **1a** indicated the rate is inversely related to [2]. We carried out the detailed kinetic study as described below.

Ynamide **1a** (0.2 mmol, 0.5 M) and 20 mol% of PhCOOH was dissolved in DCE (0.4 mL) and was mixed with five different loadings of pyridine-*N*-oxide **2** (0.25 M, 0.50 M, 0.75 M, 1.0 M, and 1.25 M). These solutions were independently heated at 100 °C and time-dependent formation of the product **4a** was measured by GLC (with *n*-dodecane as an internal standard). The plot of [4a] vs. time showed zeroth-order dependence on [4a] (a linear plot). These time evolutions were shown in Figure S1-S5 after averaging duplicate experiments for each figures.



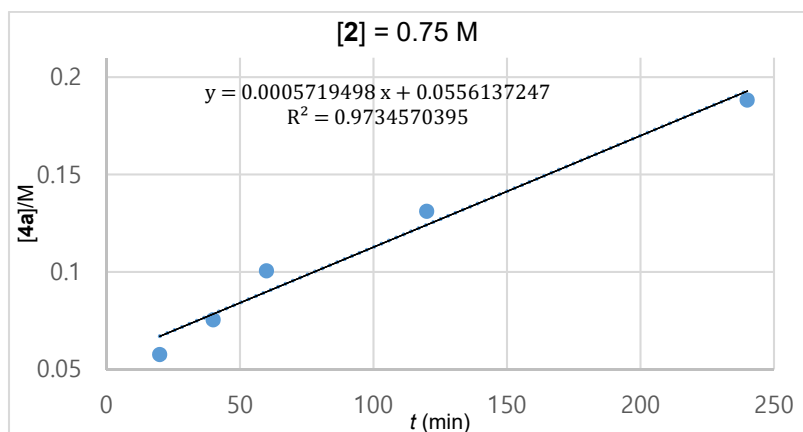

**Figure S3**

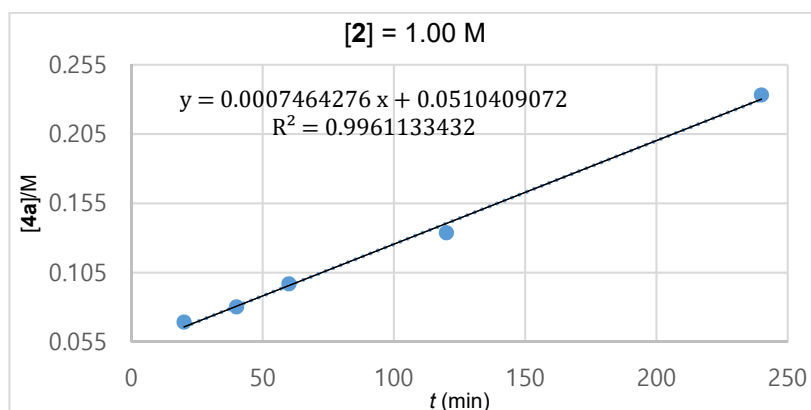

**Figure S4**

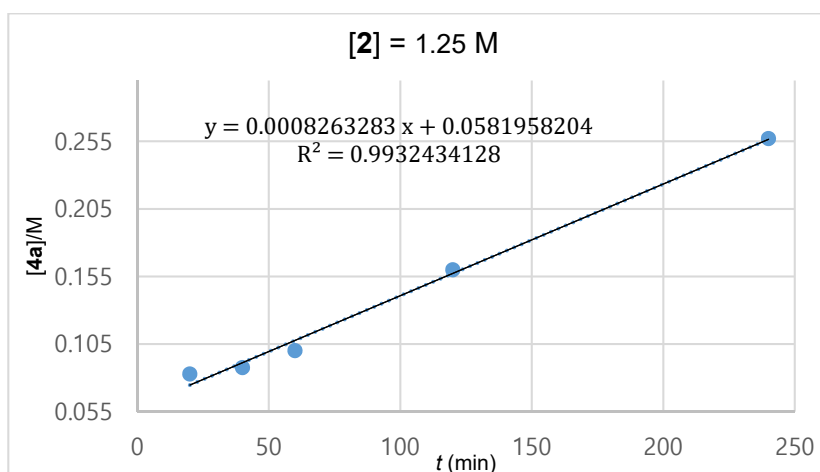

**Figure S5**

A linear plot in the Figure S1-S5 as well as the rate dependency on [1a] (Figure S6) shows that the formation of 4a is 0<sup>th</sup> order in ynamide 1a. The rates of the formation of 4a ( $Mh^{-1}$ ) in each concentration of [2], was calculated from the least-square fit of the slopes in Figure S1-S5 which was then plotted against [2] in Figure

S7.

The first-order rate dependence on pyridine-*N*-oxide **2** indicates that the rate-determining step is the attack of **2** on the halonium **H** (Scheme 3 of manuscript). The rate was not affected by the concentration of ynamide **1a** (Figure S6), which indicates the formation of keteniminium **D** as well as halonium **H** is fast and reversible processes and the concentration of **D** in the reaction mixture is limited by the concentration of the acid catalyst, [PhCOOH].

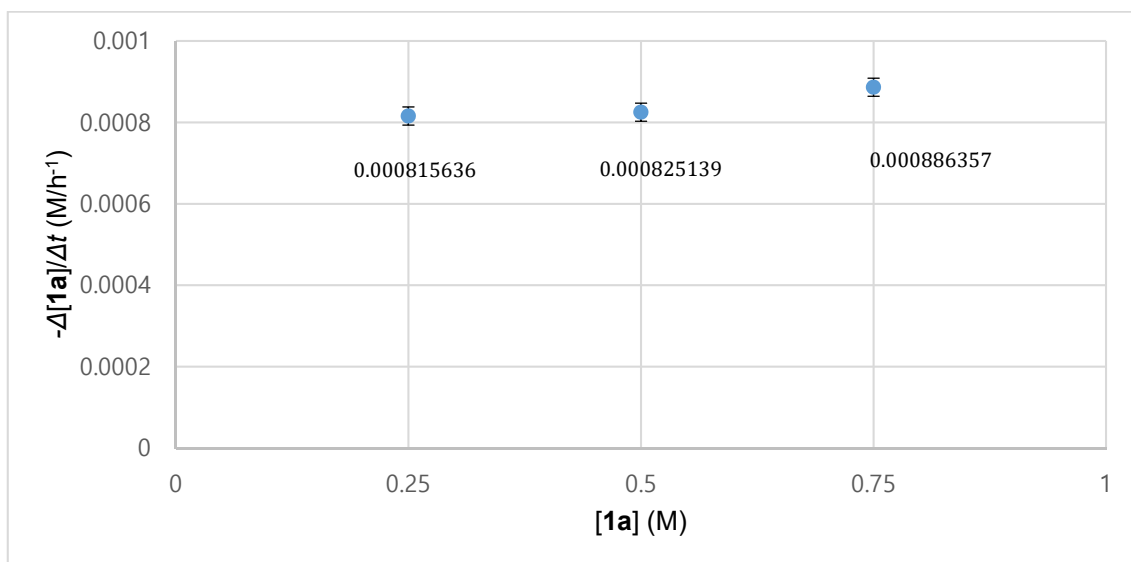

Figure S6 The rate dependence on ynamide **1a**

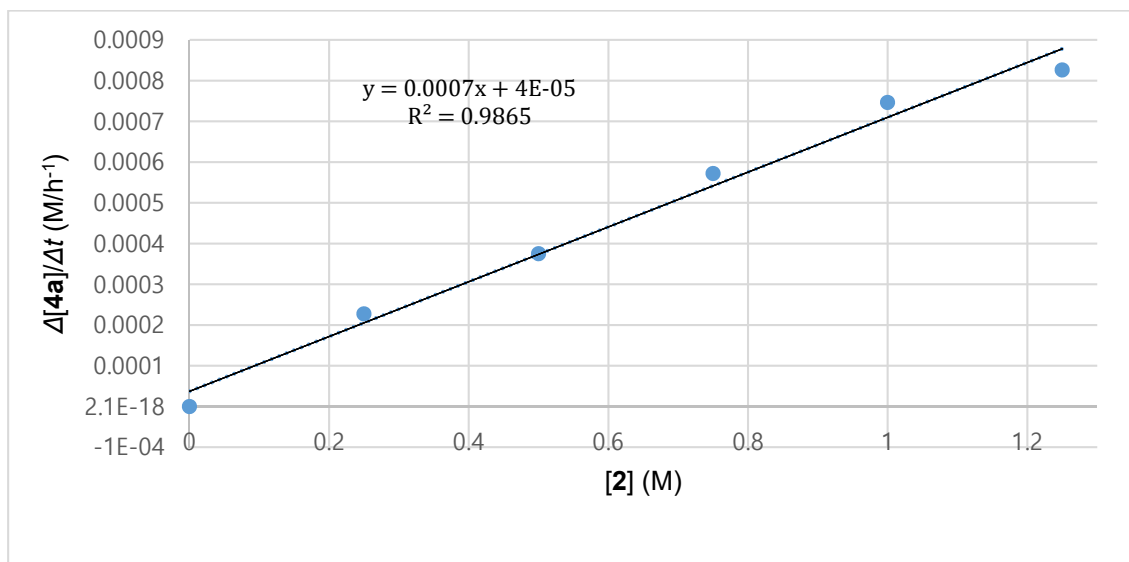

Figure S7 The rate dependence on pyridine-*N*-oxide **2**

#### 4. Halide Test

Mechanistically, there is a possibility that the current halogenation may actually occur by the halide anion liberated from the reaction of pyridine-*N*-oxide and halogenated solvents. To exclude such a possibility, pyridine-*N*-oxide was heated in 1,2-DCE (1.0 M) for 12 h at 100 °C and an aliquot (0.2 mL) of the reaction mixture was mixed with saturated aqueous AgNO<sub>3</sub> solution. We did not observe the formation of precipitates in this test (left picture below).

(Mixture A)

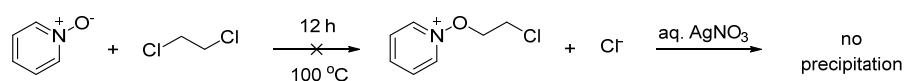

On the other hand, a similar experiment was repeated with CH<sub>3</sub>I as solvent. This time, the reaction mixture that was heated for 20 min at 65 °C generated iodide anion, which was confirmed by the positive AgNO<sub>3</sub> test (right picture below).

(Mixture B)

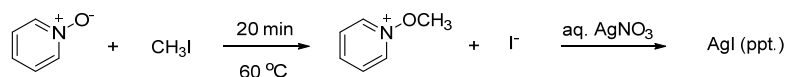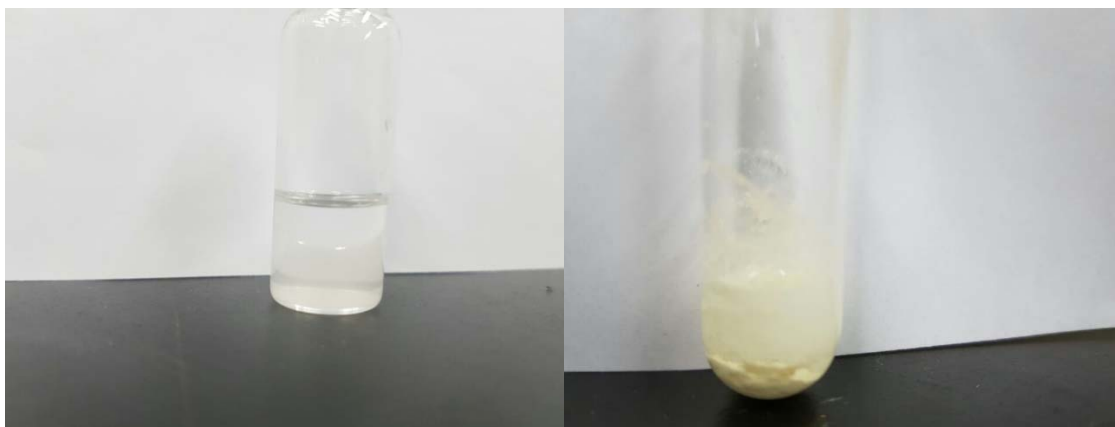

Mixture A

(no precipitation observed)

Mixture B

(yellow precipitation of AgI observed)

## 5. General Procedure

### General Procedure A: Hydrochlorination

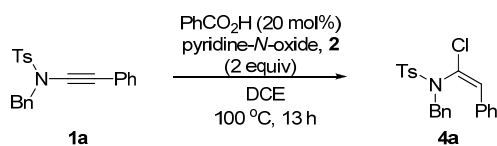

Ynamide **1a** (0.1 mmol) was added in a 10 ml screw-capped test tube. Pyridine *N*-oxide (0.2 mmol), benzoic acid (0.02 mmol) and 1,2-dichloroethane (0.2 ml) was added sequentially under air. The reaction mixture was stirred at 100 °C for 13 h. Solvent was removed under vacuum and the residue was purified by column chromatography (EtOAc:*n*Hex = 1:15~1:7).

### General Procedure B: Hydrobromination

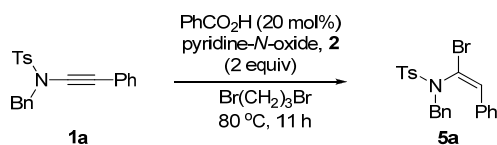

Ynamide **1a** (0.1 mmol) was added in a 10 ml screw-capped test tube. Pyridine *N*-oxide (0.2 mmol), benzoic acid (0.02 mmol) and 1,3-dibromopropane (0.2 ml) was added sequentially under air. The reaction mixture was stirred at 80 °C for 11 h. Solvent was removed under vacuum and the residue was purified by column chromatography (EtOAc:*n*Hex = 1:20~1:10).

## 6. Mechanistic Studies (Scheme 2)

(Eq. 2)

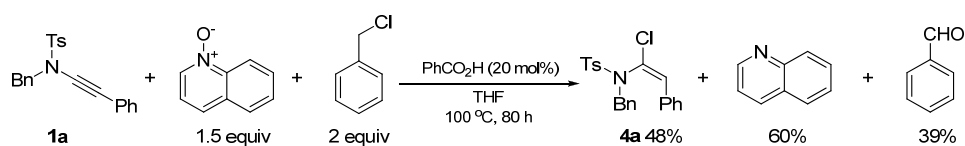

Similar procedure to General Procedure A was followed (ynamide **1a** (0.1 mmol), quinoline *N*-oxide (0.15 mmol), benzyl chloride (0.2 mmol) and benzoic acid (0.02 mmol) in THF (0.2 ml)), leading to isolation of **4a** (48%) along with quinoline (60%) and benzaldehyde (39%). The identity of the latter two was confirmed by GC-MS. The smaller yield of benzaldehyde than that of **4a** is presumably due to the volatility. The slightly higher yield of quinoline is likely due to the oxygenation of ynamides leading to  $\alpha$ -ketoamide **6a** which was observed in a trace amount in the crude <sup>1</sup>H NMR spectrum.

(Eq. 3)

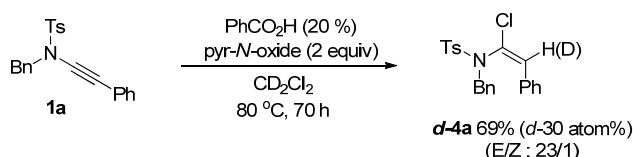



Similar procedure to General Procedure A was followed (ynamide **1a** (0.1 mmol), pyridine *N*-oxide (0.2 mmol) and benzoic acid (0.02 mmol) in CD<sub>2</sub>Cl<sub>2</sub> (1 ml)). The %D incorporation in **d-4a** was based on its <sup>1</sup>H-NMR spectrum.

(Eqs. 4 and 5)

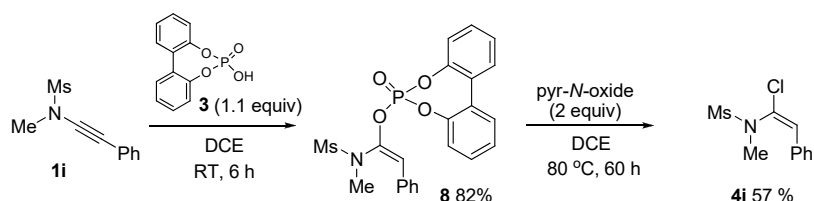

Ynamide **1i** (0.1 mmol) was stirred with diarylphosphoric acid **3** (0.11 mmol) in 1,2-dichloroethane (1 ml) at RT for 6 h. Solvent was removed and the residue was purified by column chromatography (EtOAc:*n*Hex = 1:3) to obtain **8**. Subsequently, the adduct **8** was mixed with pyridine-*N*-oxide (2 equiv.) in 1,2-dichloroethane (0.5 M) and was heated at 80 °C for 60 h. The purification of the mixture afforded **4i** in 57 % yield. For the formation of **9** and its reaction to afford **4c**, a similar procedure was followed under the reaction conditions described in the manuscript.

## 7. Characterization of Substrates and Products

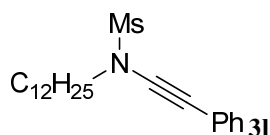

yellow liquid; <sup>1</sup>H NMR (400 MHz, CDCl<sub>3</sub>): δ 7.42-7.40 (m, 2H), 7.32-7.29 (m, 3H), 3.53 (t, *J* = 7.3 Hz, 2H), 3.13 (s, 3H), 1.83-1.76 (m, 2H), 1.45-1.26 (m, 18H), 0.88 (t, *J* = 6.9 Hz, 3H); <sup>13</sup>C NMR (100 MHz, CDCl<sub>3</sub>): δ 131.5, 128.3, 128.0, 122.7, 81.7, 71.0, 51.7, 38.2, 31.9, 29.64, 29.62, 29.56, 29.5, 29.4, 29.1, 28.3, 26.3, 22.7, 14.1; HRMS (EI) Calcd for C<sub>21</sub>H<sub>33</sub>NO<sub>2</sub>S [M]<sup>+</sup> 363.2227; found 363.2228.

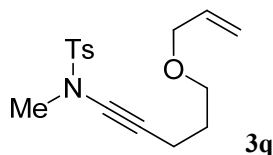

colorless liquid; <sup>1</sup>H NMR (400 MHz, CDCl<sub>3</sub>): δ 7.77 (d, *J* = 8.3 Hz, 2H), 7.35 (d, *J* = 8.3 Hz, 2H), 5.91 (ddt, *J* = 10.4, 17.2, 5.6 Hz, 1H), 5.27 (dq, *J* = 17.2, 1.64 Hz, 1H), 5.17 (dq, *J* = 10.4, 1.7 Hz, 1H), 3.96 (dt, *J* = 5.6, 1.4 Hz, 2H), 3.48 (t, *J* = 6.2 Hz, 2H), 3.01 (s, 3H), 2.46 (s, 3H), 2.35 (t, *J* = 7.1 Hz, 2H), 1.79-1.72 (m, 2H); <sup>13</sup>C NMR (100 MHz, CDCl<sub>3</sub>): δ 144.5, 134.9, 133.2, 129.7, 127.8, 116.8, 75.1, 71.9, 68.7, 68.0, 39.3, 29.1, 21.6, 15.2; HRMS (EI) Calcd for C<sub>16</sub>H<sub>21</sub>NO<sub>3</sub>S [M]<sup>+</sup> 307.1237; found 307.1237.

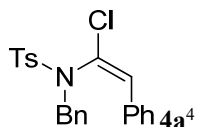

white solid (35.4 mg); mp 126-130 °C; <sup>1</sup>H NMR (400 MHz, CDCl<sub>3</sub>): δ 7.86 (d, *J* = 8.3 Hz, 2H), 7.34-7.31 (m, 4H), 7.21-7.19 (m, 5H), 7.14-7.10 (m, 3H), 6.60 (s, 1H), 4.79 (d, *J* = 10.6 Hz, 1H), 4.03 (d, *J* = 10.0 Hz, 1H), 2.46 (s, 3H); <sup>13</sup>C NMR (100 MHz, CDCl<sub>3</sub>): δ 144.6, 135.0, 134.9, 133.3, 132.9, 129.8, 129.6, 128.9, 128.8, 128.5, 128.3, 128.2, 128.1, 127.5, 52.4, 21.7; HRMS (EI) Calcd for C<sub>22</sub>H<sub>20</sub>ClNO<sub>2</sub>S [M]<sup>+</sup> 397.0898, found 397.0898.

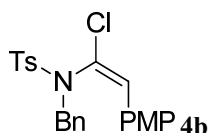

yellow solid (28.7 mg); mp 128-132 °C; <sup>1</sup>H NMR (400 MHz, CDCl<sub>3</sub>): δ 7.87 (d, *J* = 8.3 Hz, 2H), 7.35-7.32 (m, 4H), 7.24 (d, *J* = 5.6 Hz, 2H), 7.14-7.12 (m, 3H), 6.73 (d, *J* = 8.9 Hz, 2H), 6.52 (s, 1H), 4.81 (d, *J* = 13.0 Hz, 1H), 4.03 (d, *J* = 13.0 Hz, 1H), 2.46 (s, 3H); <sup>13</sup>C NMR (100 MHz, CDCl<sub>3</sub>): δ 159.8, 144.5, 135.0, 134.5, 133.5, 130.3, 129.8, 129.6, 128.9, 128.3, 128.2, 125.6, 125.4, 113.5, 55.2, 52.4, 21.7; HRMS (EI) Calcd for C<sub>23</sub>H<sub>22</sub>ClNO<sub>2</sub>S [M]<sup>+</sup> 427.1003, found 427.1003.

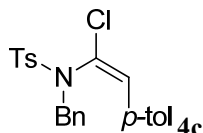

white solid (33.4 mg); mp 116-122 °C; <sup>1</sup>H NMR (400 MHz, CDCl<sub>3</sub>): δ 7.85 (d, *J* = 8.3 Hz, 2H), 7.33 (d, *J* = 8.0 Hz, 2H), 7.25-7.23 (m, 3H), 7.00 (d, *J* = 8.0 Hz, 2H), 6.56 (s, 1H), 4.80 (d, *J* = 12.8 Hz, 1H), 4.04 (d, *J* = 12.8 Hz, 1H), 2.46 (s, 3H), 2.29 (s, 3H); <sup>13</sup>C NMR (100 MHz, CDCl<sub>3</sub>): δ 144.5, 138.6, 135.0, 134.9, 133.5, 130.1, 129.8, 129.6, 128.9, 128.8, 128.7, 128.3, 128.2, 126.6, 52.4, 21.7, 21.3; HRMS (EI) Calcd for C<sub>23</sub>H<sub>22</sub>ClNO<sub>2</sub>S [M]<sup>+</sup> 411.1054, found 411.1053.

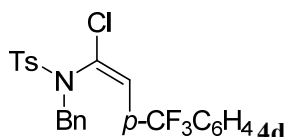

pale yellow solid (41.0 mg); mp 120-124 °C; <sup>1</sup>H NMR (400 MHz, CDCl<sub>3</sub>): δ 7.84 (d, *J* = 8.3 Hz, 2H), 7.42 (d, *J* = 8.3 Hz, 2H), 7.36-7.34 (m, 5H), 7.20-7.10 (m, 4H), 6.64 (s, 1H), 4.81 (d, *J* = 12.9 Hz, 1H), 4.02 (d, *J* = 12.2 Hz, 1H), 2.47 (s, 3H); <sup>13</sup>C NMR (100 MHz, CDCl<sub>3</sub>): δ 144.9, 144.5, 136.3 (q, <sup>4</sup>*J*<sub>CF</sub> = 1 Hz), 134.7, 133.7, 133.1, 129.8, 129.7, 128.88, 128.85 (q, <sup>2</sup>*J*<sub>CF</sub> = 41 Hz), 128.77, 128.51, 128.31, 124.9 (q, <sup>3</sup>*J*<sub>CF</sub> = 4 Hz), 124.0 (q, <sup>1</sup>*J*<sub>CF</sub> = 271 Hz), 52.4, 21.7; HRMS (EI) Calcd for C<sub>23</sub>H<sub>19</sub>ClF<sub>3</sub>NO<sub>2</sub>S [M]<sup>+</sup> 465.0772, found 465.0773.

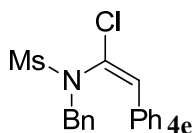

pale yellow liquid (26.7 mg); <sup>1</sup>H NMR (400 MHz, CDCl<sub>3</sub>): δ 7.28-7.26 (m, 4H), 7.20-7.14 (m, 6H), 6.56 (s, 1H), 4.71 (bs, 1H), 4.38 (bs, 1H), 3.05 (s, 3H); <sup>13</sup>C NMR (100 MHz, CDCl<sub>3</sub>): δ 134.6, 133.2, 132.6, 129.8, 128.7, 128.6, 128.5, 128.3, 128.2, 127.2, 53.0, 39.6; HRMS (EI) Calcd for C<sub>16</sub>H<sub>16</sub>ClNO<sub>2</sub>S [M]<sup>+</sup> 321.0585, found 321.0585.

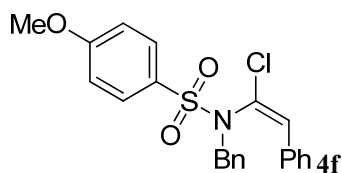

pale yellow solid (33.5 mg); mp 122-126 °C;  $^1\text{H NMR}$  (400 MHz,  $\text{CDCl}_3$ ):  $\delta$  7.90 (d,  $J = 9.0$  Hz, 2H), 7.33 (d,  $J = 5.6$  Hz, 2H), 7.31-7.18 (m, 5H), 7.14-7.10 (m, 2H), 6.95 (d,  $J = 9.0$  Hz, 2H), 6.59 (s, 1H), 4.78 (d,  $J = 12.0$  Hz, 1H), 4.03 (d,  $J = 12.8$  Hz, 3H) 3.89 (s, 3H);  $^{13}\text{C NMR}$  (100 MHz,  $\text{CDCl}_3$ ):  $\delta$  163.7, 134.9, 133.4, 132.9, 131.1, 129.8, 129.3, 128.8, 128.5, 128.3, 128.2, 128.1, 127.7, 114.1, 55.7, 52.4; HRMS (EI) Calcd for  $\text{C}_{22}\text{H}_{20}\text{ClNO}_3\text{S}$   $[\text{M}]^+$  413.0847, found 413.0847.

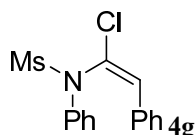

white solid (27.0 mg); mp 126-130 °C;  $^1\text{H NMR}$  (400 MHz,  $\text{CDCl}_3$ ):  $\delta$  7.60-7.55 (m, 4H), 7.38-7.27 (m, 6H), 6.87 (s, H), 3.16 (s, 3H);  $^{13}\text{C NMR}$  (100 MHz,  $\text{CDCl}_3$ ):  $\delta$  138.9, 133.6, 132.6, 129.6, 129.0, 128.7, 128.6, 128.1, 127.6, 124.3, 39.6; HRMS (EI) Calcd for  $\text{C}_{15}\text{H}_{14}\text{ClNO}_2\text{S}$   $[\text{M}]^+$  307.0428, found 307.0428.

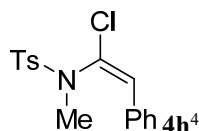

white solid (27.0 mg); mp 116-120 °C;  $^1\text{H NMR}$  (400 MHz,  $\text{CDCl}_3$ ):  $\delta$  7.77 (d,  $J = 8.2$  Hz, 2H), 7.59 (d,  $J = 8.4$  Hz, 2H), 7.37-7.28 (m, 5H), 6.65 (s, H), 3.02 (s, 3H), 2.43 (s, 3H);  $^{13}\text{C NMR}$  (100 MHz,  $\text{CDCl}_3$ ):  $\delta$  133.4, 134.2, 133.1, 132.4, 129.8, 129.5, 128.9, 128.8, 128.77, 128.68, 35.7, 21.7.

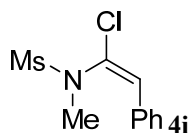

colorless liquid (21.6 mg);  $^1\text{H NMR}$  (400 MHz,  $\text{CDCl}_3$ ):  $\delta$  7.60-7.56 (m, 2H), 7.40—7.33 (m, 3H), 6.72 (s, H), 3.17 (s, 3H), 3.04 (s, 3H);  $^{13}\text{C NMR}$  (100 MHz,  $\text{CDCl}_3$ ):  $\delta$  132.7, 132.5, 129.5, 129.1, 128.8, 128.7, 38.1, 35.8; HRMS (EI) Calcd for  $\text{C}_{10}\text{H}_{12}\text{ClNO}_2\text{S}$   $[\text{M}]^+$  245.0272, found 245.0272.

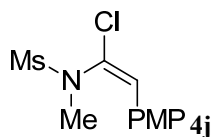

pale yellow liquid (25.1 mg);  $^1\text{H NMR}$  (400 MHz,  $\text{CDCl}_3$ ):  $\delta$  7.53 (d,  $J = 8.6$  Hz, 2H), 6.88 (d,  $J = 8.9$  Hz, 2H), 6.61 (s, 1H), 3.81 (s, 3H) 3.14 (s, 3H), 3.03 (s, 3H);  $^{13}\text{C NMR}$  (100 MHz,  $\text{CDCl}_3$ ):  $\delta$  160.1, 132.11, 130.2, 126.9, 125.4, 114.2, 55.3, 38.0 35.6; HRMS (EI) Calcd for  $\text{C}_{11}\text{H}_{14}\text{ClNO}_3\text{S}$   $[\text{M}]^+$  275.0377, found 275.0377; 1D-NOE experiments were conducted to support the (E)-geometry.

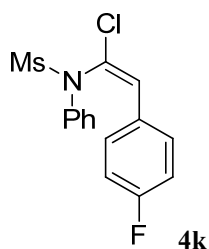

Yellow sticky solid (19.2 mg);  $^1\text{H}$  NMR (400 MHz,  $\text{CDCl}_3$ ):  $\delta$  7.52-7.51 (m, 4H), 7.37-7.27 (m, 3H), 7.05-7.00 (m, 2H), 6.80 (s, 1H), 3.15 (s, 3H);  $^{13}\text{C}$  NMR (100 MHz,  $\text{CDCl}_3$ ):  $\delta$  162.8 (d,  $^1J_{\text{CF}} = 249$  Hz), 138.7, 132.4, 130.6 (d,  $^3J_{\text{CF}} = 8$  Hz), 129.6, 128.7 (d,  $^4J_{\text{CF}} = 3$  Hz), 128.0, 127.7, 124.2, 115.7 (d,  $^2J_{\text{CF}} = 21$  Hz), 39.6; HRMS (EI) Calcd for  $\text{C}_{15}\text{H}_{13}\text{ClFNO}_2\text{S}$   $[\text{M}]^+$  325.0334, found 325.0334.

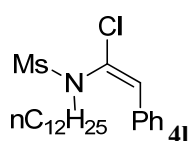

yellow liquid (27.6 mg);  $^1\text{H}$  NMR (400 MHz,  $\text{CDCl}_3$ ):  $\delta$  7.63 (d,  $J = 6.8$  Hz, 2H), 7.36-7.29 (m, 3H), 6.81 (s, 1H), 3.50-3.36 (bd, 2H), 1.84-1.77 (m, 2H), 1.57-1.15 (m, 18H), 0.88 (t,  $J = 6.7$  Hz, 3H);  $^{13}\text{C}$  NMR (100 MHz,  $\text{CDCl}_3$ ):  $\delta$  134.5, 132.8, 129.1, 129.0, 128.6, 127.4, 49.0, 38.6, 31.9, 29.63, 29.59, 29.47, 29.4, 29.3, 29.1, 27.5, 26.8, 22.7, 14.1; HRMS (FAB) Calcd for  $\text{C}_{21}\text{H}_{35}\text{ClNO}_2\text{S}$   $[\text{M}+\text{H}]^+$  400.2072, found 400.2071.

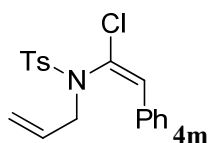

pale yellow solid (21.2 mg); mp 112-116  $^\circ\text{C}$ ;  $^1\text{H}$  NMR (400 MHz,  $\text{CDCl}_3$ ):  $\delta$  7.84 (d,  $J = 8.3$  Hz, 2H), 7.70 (d,  $J = 8.6$  Hz, 2H), 7.40-7.33 (m, 5H), 6.76 (s, 1H), 5.73 (tdd,  $J = 7.0, 10.0, 17.0$  Hz, H), 5.27 (app qd,  $J = 1.3, 17.0$  Hz, 1H), 5.15 (app qd,  $J = 1.4, 10.0$  Hz, 1H), 4.30 (bs, 1H), 3.65 (bs, 1H), 2.47 (s, 3H);  $^{13}\text{C}$  NMR (100 MHz,  $\text{CDCl}_3$ ):  $\delta$  144.6, 134.7, 134.4, 133.1, 130.6, 129.6, 129.1, 128.90, 128.85, 128.5, 127.6, 120.9, 51.6, 21.7; HRMS (EI) Calcd for  $\text{C}_{18}\text{H}_{18}\text{ClNO}_2\text{S}$   $[\text{M}]^+$  347.0741, found 347.0741.

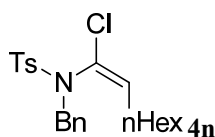

colorless liquid (29.2 mg);  $^1\text{H}$  NMR (400 MHz,  $\text{CDCl}_3$ ):  $\delta$  7.85 (d,  $J = 8.4$  Hz, 2H), 7.39-7.31 (m, 7H), 5.75-5.69 (m, 1H), 4.83 (d,  $J = 13.3$  Hz, 1H), 3.94 (d,  $J = 13.4$  Hz, 1H), 2.48 (s, 3H), 2.48-1.85 (m, 2H), 1.28-0.86 (m, 8H), 0.65 (t,  $J = 8.0$  Hz, 3H);  $^{13}\text{C}$  NMR (100 MHz,  $\text{CDCl}_3$ ):  $\delta$  144.2, 138.1, 135.6, 134.5, 129.6, 128.43, 128.37, 128.2, 125.1, 51.3, 31.6, 29.5, 28.8, 28.2, 22.5, 21.7, 14.1; HRMS (EI) Calcd for  $\text{C}_{22}\text{H}_{28}\text{ClNO}_2\text{S}$   $[\text{M}]^+$  405.1524, found 405.1524.

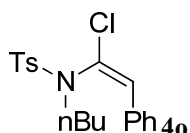

pale yellow liquid (25.4 mg);  $^1\text{H NMR}$  (400 MHz,  $\text{CDCl}_3$ ):  $\delta$  7.81 (d,  $J = 8.4$  Hz, 2H), 7.71 (d,  $J = 7.1$  Hz, 2H) 7.38-7.31 (m, 5H), 6.77 (s, 1H), 3.56 (bs, 1H), 2.99 (bs, 1H), 1.59-1.56 (m, 2H), 1.52-1.50 (m, 2H), 0.81 (t,  $J = 7.4$  Hz, 3H);  $^{13}\text{C NMR}$  (100 MHz,  $\text{CDCl}_3$ ):  $\delta$  144.4, 134.7, 134.4, 133.1, 129.6, 129.5, 129.1, 128.9, 128.5, 127.9, 48.3, 29.3, 21.6, 20.1, 13.6; HRMS (EI) Calcd for  $\text{C}_{19}\text{H}_{22}\text{ClNO}_2\text{S}$   $[\text{M}]^+$  363.1054, found 363.1054.

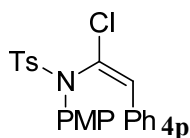

yellow solid (34.3 mg); mp 122-126 °C;  $^1\text{H NMR}$  (400 MHz,  $\text{CDCl}_3$ ):  $\delta$  7.86 (d,  $J = 7.2$  Hz, 2H), 7.62 (d,  $J = 8.4$  Hz, 2H), 7.39 (t,  $J = 7.6$  Hz, 2H), 7.32 (t,  $J = 7.6$  Hz, 1H), 7.22 (d,  $J = 8.0$  Hz, 2H), 7.12 (d,  $J = 9.1$  Hz, 2H), 6.74 (s, 1H), 6.70 (d,  $J = 9.1$  Hz, 2H), 3.73 (s, 3H), 2.41 (s, 3H);  $^{13}\text{C NMR}$  (100 MHz,  $\text{CDCl}_3$ ):  $\delta$  159.5, 144.4, 135.1, 133.0, 132.9, 131.6, 129.5, 129.2, 129.1, 128.9, 128.8, 128.6, 114.2, 55.4, 21.7; HRMS (EI) Calcd for  $\text{C}_{22}\text{H}_{20}\text{ClNO}_3\text{S}$   $[\text{M}]^+$  413.0847, found 413.0847.

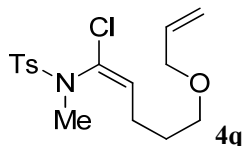

colorless liquid (24.4 mg);  $^1\text{H NMR}$  (400 MHz,  $\text{CDCl}_3$ ):  $\delta$  7.76 (d,  $J = 8.1$  Hz, 2H), 7.32 (d,  $J = 8.2$  Hz, 2H), 5.99-5.87 (m, 1H), 5.82 (t,  $J = 7.6$  Hz, 1H), 5.28 (d,  $J = 17.2$  Hz, 1H), 5.18 (d,  $J = 10.4$  Hz, 1H), 3.97 (t,  $J = 4.8$  Hz, 2H), 3.46 (t,  $J = 6.4$  Hz, 2H), 2.92 (s, 3H), 2.44 (s, 3H), 2.44(m, 2H), 1.77-1.70 (m, 2H);  $^{13}\text{C NMR}$  (100 MHz,  $\text{CDCl}_3$ ):  $\delta$  144.2, 134.9, 134.6, 134.4, 129.5, 128.5, 128.3, 116.8, 71.8, 69.6, 35.9, 28.6, 26.1, 21.6; HRMS (FAB) Calcd for  $\text{C}_{16}\text{H}_{23}\text{ClNO}_3\text{S}$   $[\text{M}+\text{H}]^+$  344.1082, found 344.1082.

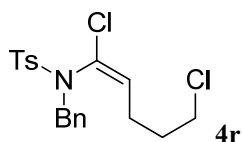

white solid (29.2 mg); mp 98-102 °C;  $^1\text{H NMR}$  (400 MHz,  $\text{CDCl}_3$ ):  $\delta$  7.82 (d,  $J = 8.4$  Hz, 2H), 7.38-7.30 (m, 7H), 5.72-5.67 (m, 1H), 4.82 (d,  $J = 13.2$  Hz, 1H), 3.91 (d,  $J = 13.2$  Hz, 1H), 3.19 (t,  $J = 6.8$  Hz, 2H), 2.46 (s, 3H), 2.17-1.96 (m, 2H), 1.54-1.48 (m, 1H), 1.19-1.10 (m, 1H);  $^{13}\text{C NMR}$  (100 MHz,  $\text{CDCl}_3$ ):  $\delta$  144.4, 135.9, 135.4, 134.4, 129.7, 128.7, 128.6, 128.4, 128.4, 126.5, 51.3, 44.0, 31.2, 26.9, 21.7; HRMS (FAB) Calcd for  $\text{C}_{19}\text{H}_{22}\text{Cl}_2\text{NO}_2\text{S}$   $[\text{M}+\text{H}]^+$  398.0743, found 398.0743.

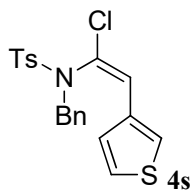

white solid (37.2 mg); mp 110-112 °C;  $^1\text{H NMR}$  (400 MHz,  $\text{CDCl}_3$ ):  $\delta$  7.88 (d,  $J = 8.3$  Hz, 2H), 7.37-7.35 (m, 3H), 7.25-7.23 (m, 3H), 7.15-7.13 (m, 4H), 6.61 (s, 1H), 4.82 (d,  $J = 13.0$  Hz, 1H), 3.99 (d,  $J = 13.0$  Hz, 1H), 2.47 (s, 3H);  $^{13}\text{C NMR}$  (100 MHz,  $\text{CDCl}_3$ ):  $\delta$  144.6, 134.8, 134.1, 133.4, 129.72, 129.66, 129.5, 128.9, 128.3, 128.2, 127.7, 126.5, 126.2, 125.0, 52.3, 21.7; HRMS (EI) Calcd for  $\text{C}_{20}\text{H}_{18}\text{ClNO}_2\text{S}_2$   $[\text{M}]^+$  403.0462, found 403.0462.

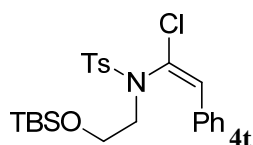

sticky white liquid (36.4 mg);  $^1\text{H}$  NMR (400 MHz,  $\text{CDCl}_3$ ):  $\delta$  7.94 (d,  $J = 8.3$  Hz, 2H), 7.69 (d,  $J = 6.8$  Hz, 2H), 7.35-7.28 (m, 5H), 6.74 (s, 1H), 3.76 (d,  $J = 10.0$  Hz, 1H), 3.71-3.62 (m, 2H), 3.22 (d,  $J = 9.6$  Hz, 1H), 2.43 (s, 3H), 0.80 (s, 9H), -0.07 (s, 6H);  $^{13}\text{C}$  NMR (100 MHz,  $\text{CDCl}_3$ ):  $\delta$  144.6, 135.0, 134.3, 133.3, 129.7, 129.4, 128.99, 128.96, 128.6, 128.1, 60.5, 50.6, 26.0, 21.8, 18.4, -5.4; HRMS (FAB) Calcd for  $\text{C}_{23}\text{H}_{33}\text{ClNO}_3\text{Si}$   $[\text{M}+\text{H}]^+$  466.1633, found 466.1634.

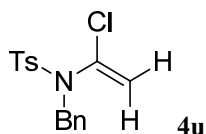

colorless liquid (13.2 mg);  $^1\text{H}$  NMR (400 MHz,  $\text{CDCl}_3$ ):  $\delta$  7.79 (d,  $J = 8.3$  Hz, 2H), 7.36-7.31 (m, 7H), 5.43 (d,  $J = 1.5$  Hz, 1H), 5.31 (d,  $J = 1.5$  Hz, 1H), 4.50 (s, 2H), 2.46 (s, 3H);  $^{13}\text{C}$  NMR (100 MHz,  $\text{CDCl}_3$ ):  $\delta$  144.4, 135.4, 134.8, 133.7, 129.7, 128.9, 128.5, 128.1, 128.1, 120.3, 51.2, 29.7, 21.7; HRMS (FAB) Calcd for  $\text{C}_{16}\text{H}_{17}\text{ClNO}_2\text{S}$   $[\text{M}+\text{H}]^+$  322.0663, found 322.0663.

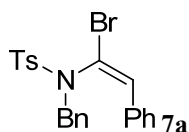

white solid (37.2 mg);  $^1\text{H}$  NMR (400 MHz,  $\text{CDCl}_3$ ):  $\delta$  7.87 (d,  $J = 8.2$  Hz, 2H), 7.36-7.29 (m, 5H), 7.20-7.11 (m, 5H), 6.82 (s, 1H), 4.83 (d,  $J = 13.0$  Hz, 1H), 3.94 (d,  $J = 13.0$  Hz, 1H), 2.47 (s, 3H);  $^{13}\text{C}$  NMR (100 MHz,  $\text{CDCl}_3$ ):  $\delta$  144.8, 139.8, 134.3, 133.5, 133.2, 129.9, 129.6, 129.2, 128.7, 128.6, 128.3, 128.2, 128.0, 119.7, 53.4, 21.8; HRMS (FAB) Calcd for  $\text{C}_{22}\text{H}_{21}\text{BrNO}_2\text{S}$   $[\text{M}+\text{H}]^+$  442.0471, found 442.0471.

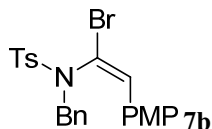

white solid (31.2 mg);  $^1\text{H}$  NMR (400 MHz,  $\text{CDCl}_3$ ):  $\delta$  7.88 (d,  $J = 8.3$  Hz, 2H), 7.36-7.28 (m, 6H), 7.16-7.12 (m, 3H), 6.73 (s, 1H), 6.72 (d,  $J = 8.9$  Hz, 2H), 4.84 (d,  $J = 13.1$  Hz, 1H), 3.94 (d,  $J = 13.0$  Hz, 1H), 3.78 (s, 3H), 2.47 (s, 3H);  $^{13}\text{C}$  NMR (100 MHz,  $\text{CDCl}_3$ ):  $\delta$  159.8, 144.7, 139.2, 134.4, 133.4, 130.4, 129.9, 129.6, 129.2, 1128.3, 128.2, 126.4, 117.5, 113.5, 55.2, 53.3, 21.7; HRMS (FAB) Calcd for  $\text{C}_{23}\text{H}_{23}\text{BrNO}_3\text{S}$   $[\text{M}+\text{H}]^+$  472.0577, found 472.0577.

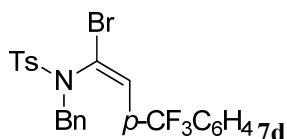

pale yellow sticky solid (40.7 mg);  $^1\text{H}$  NMR (400 MHz,  $\text{CDCl}_3$ ):  $\delta$  7.85 (d,  $J = 8.3$  Hz, 2H), 7.41-7.31 (m, 7H),

7.24-7.11 (m, 4H), 6.86 (s, 1H), 4.84 (d,  $J = 13.1$  Hz, 1H), 3.93 (d,  $J = 13.1$  Hz, 1H), 2.47 (s, 3H);  $^{13}\text{C}$  NMR (100 MHz,  $\text{CDCl}_3$ ):  $\delta$  145.0, 138.4, 137.0 (q,  $^4J_{\text{CF}} = 2$  Hz), 134.1, 133.0, 129.9, 129.7, 129.2, 129.1, 128.7, 128.6, 128.5 (q,  $^2J_{\text{CF}} = 32$  Hz), 128.3, 124.9 (q,  $^3J_{\text{CF}} = 4$  Hz), 123.7 (q,  $^1J_{\text{CF}} = 334$  Hz), 53.4, 21.7; HRMS (FAB) Calcd for  $\text{C}_{23}\text{H}_{20}\text{BrF}_3\text{NO}_2\text{S}$   $[\text{M}+\text{H}]^+$  510.0345, found 510.0346.

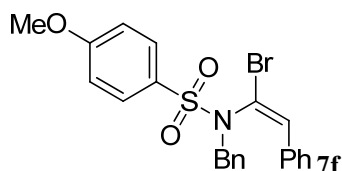

white solid (38.0 mg);  $^1\text{H}$  NMR (400 MHz,  $\text{CDCl}_3$ ):  $\delta$  7.91 (d,  $J = 7.8$  Hz, 2H), 7.38-7.27 (m, 4H), 7.24-7.10 (m, 6H), 7.00 (d,  $J = 7.8$  Hz, 2H), 6.81 (s, 1H), 4.82 (d,  $J = 13.0$  Hz, 1H), 3.93 (d,  $J = 13.1$  Hz, 1H), 3.90 (s, 3H);  $^{13}\text{C}$  NMR (100 MHz,  $\text{CDCl}_3$ ):  $\delta$  163.9, 139.7, 133.6, 133.3, 131.4, 129.9, 128.74, 128.69, 128.62, 128.3, 128.2, 128.1, 119.9, 114.1, 55.7, 53.4; HRMS (FAB) Calcd for  $\text{C}_{22}\text{H}_{21}\text{BrNO}_2\text{S}$   $[\text{M}+\text{H}]^+$  458.0420, found 458.0420.

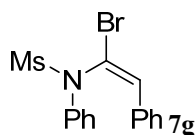

pale yellow sticky solid (30.4 mg);  $^1\text{H}$  NMR (400 MHz,  $\text{CDCl}_3$ ):  $\delta$  7.57-7.54 (m, 4H), 7.36-7.27 (m, 6H), 7.07 (s, H), 3.15 (s, 3H);  $^{13}\text{C}$  NMR (100 MHz,  $\text{CDCl}_3$ ):  $\delta$  138.9, 138.6, 133.4, 129.6, 129.2, 128.7, 128.6, 127.5, 123.8, 118.0, 39.1; HRMS (FAB) Calcd for  $\text{C}_{15}\text{H}_{15}\text{BrNO}_2\text{S}$   $[\text{M}+\text{H}]^+$  352.0001, found 352.0001.

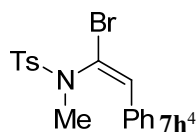

white solid (32.2 mg); E/Z = 1.8/1;  $^1\text{H}$  NMR (400 MHz,  $\text{CDCl}_3$ ) for only E isomer :  $\delta$  7.79-7.75 (m, 2H), 7.60-7.58 (m, 2H), 7.39-7.29 (m, 5H), 6.86 (s, H), 2.99 (s, 3H), 2.44 (s, 3H);  $^{13}\text{C}$  NMR (100 MHz,  $\text{CDCl}_3$ ) for E/Z mixture :  $\delta$  137.1, 134.2, 134.0, 133.83, 133.77, 133.66, 129.6, 129.5, 129.3, 129.1, 129.0, 128.8, 128.7, 128.5, 128.2, 121.4, 120.5, 37.0, 36.7, 21.7; 1D-NOE experiments were conducted to support the (E)-geometry of the major isomer.

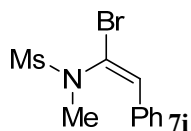

pale yellow sticky solid (22.3 mg); E/Z = 1.3/1;  $^1\text{H}$  NMR (400 MHz,  $\text{CDCl}_3$ ) for only E isomer :  $\delta$  7.57 (d,  $J = 8.0$  Hz, 2H), 7.41-7.29 (m, 3H), 6.89 (s, H), 3.09 (s, 3H), 2.99 (s, 3H);  $^{13}\text{C}$  NMR (100 MHz,  $\text{CDCl}_3$ ) for E/Z mixture :  $\delta$  137.3, 135.0, 133.5, 133.4, 129.3, 129.2, 129.0, 128.8, 128.7, 128.3, 120.5, 119.6, 37.4, 37.2, 37.1, 36.5; HRMS (FAB) Calcd for  $\text{C}_{10}\text{H}_{13}\text{BrNO}_2\text{S}$   $[\text{M}+\text{H}]^+$  289.9845, found 289.9845.

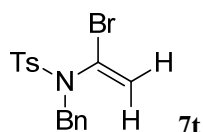

white solid (27.8 mg); mp 124-128  $^\circ\text{C}$ ;  $^1\text{H}$  NMR (400 MHz,  $\text{CDCl}_3$ ):  $\delta$  7.79 (d,  $J = 8.3$  Hz, 2H), 7.36-7.29 (m, 7H), 5.72 (d,  $J = 1.3$  Hz, 1H), 5.51 (d,  $J = 1.3$  Hz, 1H), 4.47 (s, 2H), 2.46 (s, 3H);  $^{13}\text{C}$  NMR (100 MHz,  $\text{CDCl}_3$ ):

$\delta$  144.5, 135.0, 134.7, 129.7, 129.0, 128.6, 128.3, 128.1, 125.3, 124.8, 52.2, 21.7; HRMS (FAB) Calcd for  $C_{16}H_{17}BrNO_2S$   $[M+H]^+$  366.0158, found 366.0158.

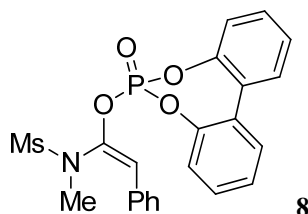

pale yellow solid;  $^1H$  NMR (400 MHz,  $CDCl_3$ ):  $\delta$  7.62-7.49 (m, 6H), 7.46-7.30 (m, 7H), 3.17 (s, 3H), 2.86 (s, 3H);  $^{13}C$  NMR (100 MHz,  $CDCl_3$ ):  $\delta$  147.5 (d,  $J_{CP} = 9.5$  Hz), 139.7 (d,  $J_{CP} = 8.7$  Hz), 131.4, 130.4, 130.2, 128.8, 128.70, 128.69, 128.0, 127.0, 121.4 (d,  $J_{CP} = 4.8$  Hz), 117.7 (d,  $J_{CP} = 3.8$  Hz), 39.0, 35.8;  $^{31}P$  NMR (162 MHz,  $CDCl_3$ ):  $\delta$  5.00; HRMS (FAB) Calcd for  $C_{22}H_{21}NO_6PS$   $[M+H]^+$  458.0822, found 458.0822.

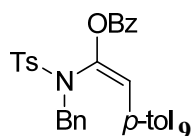

colorless to white solid;  $^1H$  NMR (400 MHz,  $CDCl_3$ ):  $\delta$  7.76 (d,  $J = 8.0$  Hz, 2H), 7.70 (dd,  $J = 8.4, 1.6$  Hz, 2H), 7.57 (tt,  $J = 7.2, 1.2$  Hz, 1H), 7.38 (t,  $J = 7.6$  Hz, 2H), 7.27-7.23 (m, 4H), 7.18-7.11 (m, 5H), 7.00 (d,  $J = 8.0$  Hz, 2H), 6.47 (s, 1H), 4.51 (s, 2H), 2.33 (s, 3H), 2.31 (s, 3H);  $^{13}C$  NMR (100 MHz,  $CDCl_3$ ):  $\delta$  164.0, 143.8, 138.0, 136.8, 136.3, 134.6, 133.6, 130.0, 129.7, 129.5, 129.1, 128.9, 128.7, 128.3, 128.2, 128.1, 128.0, 123.4, 52.8, 21.5, 21.3; HRMS (FAB) Calcd for  $C_{30}H_{28}NO_4S$   $[M+H]^+$  498.1734, found 498.1734.



## Appendix

$^1\text{H}$  and  $^{13}\text{C}$  NMR spectra for all new compounds

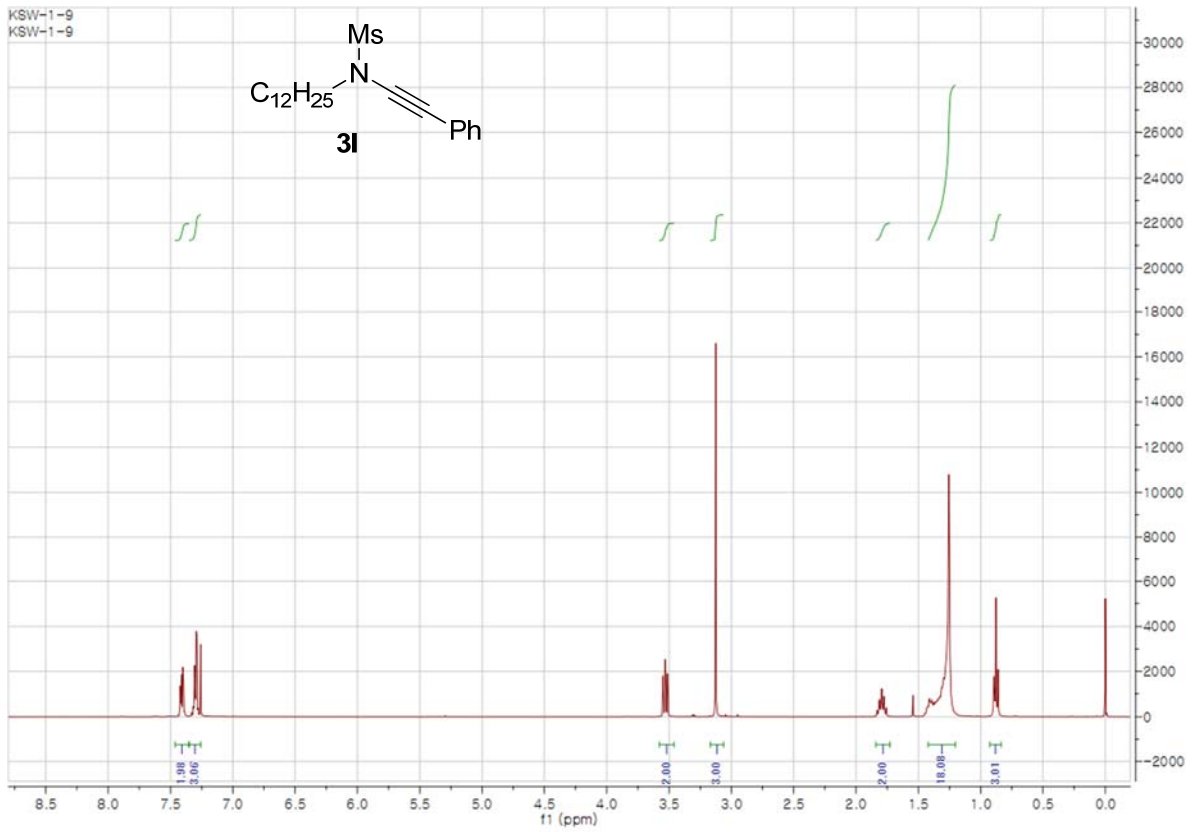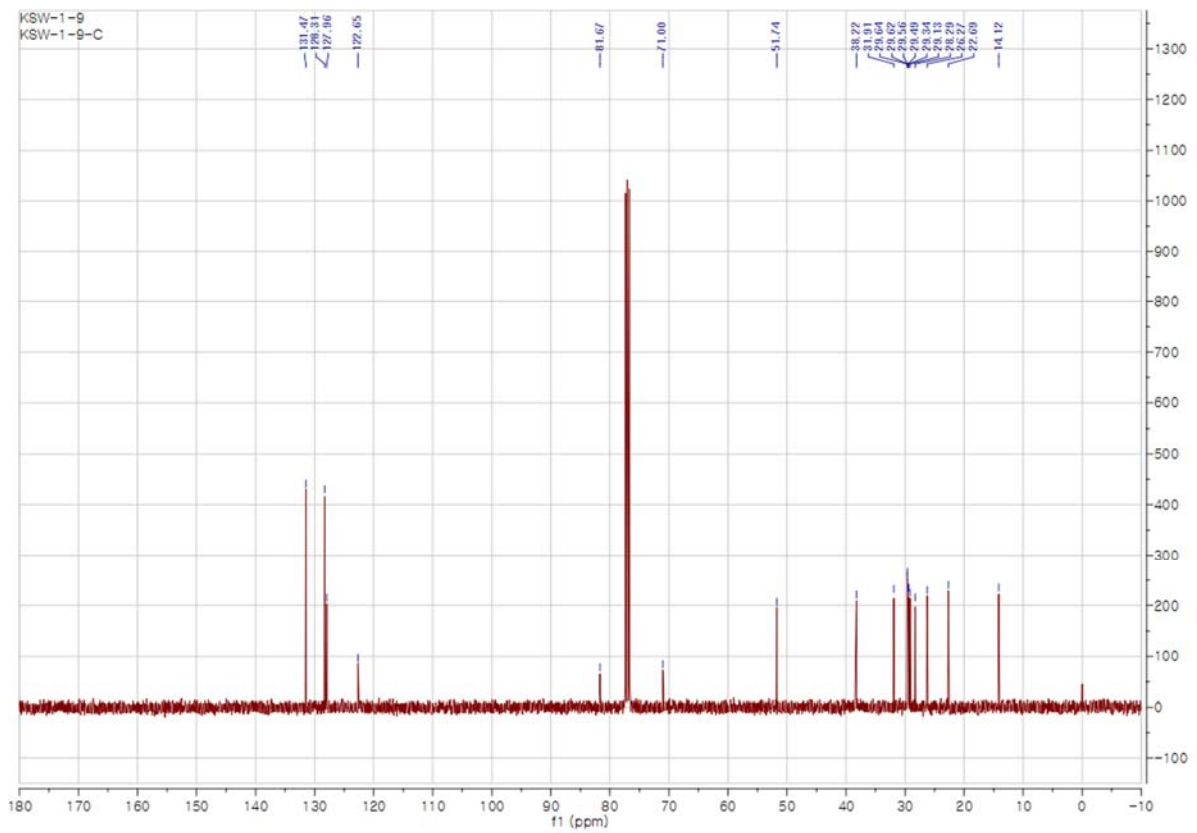

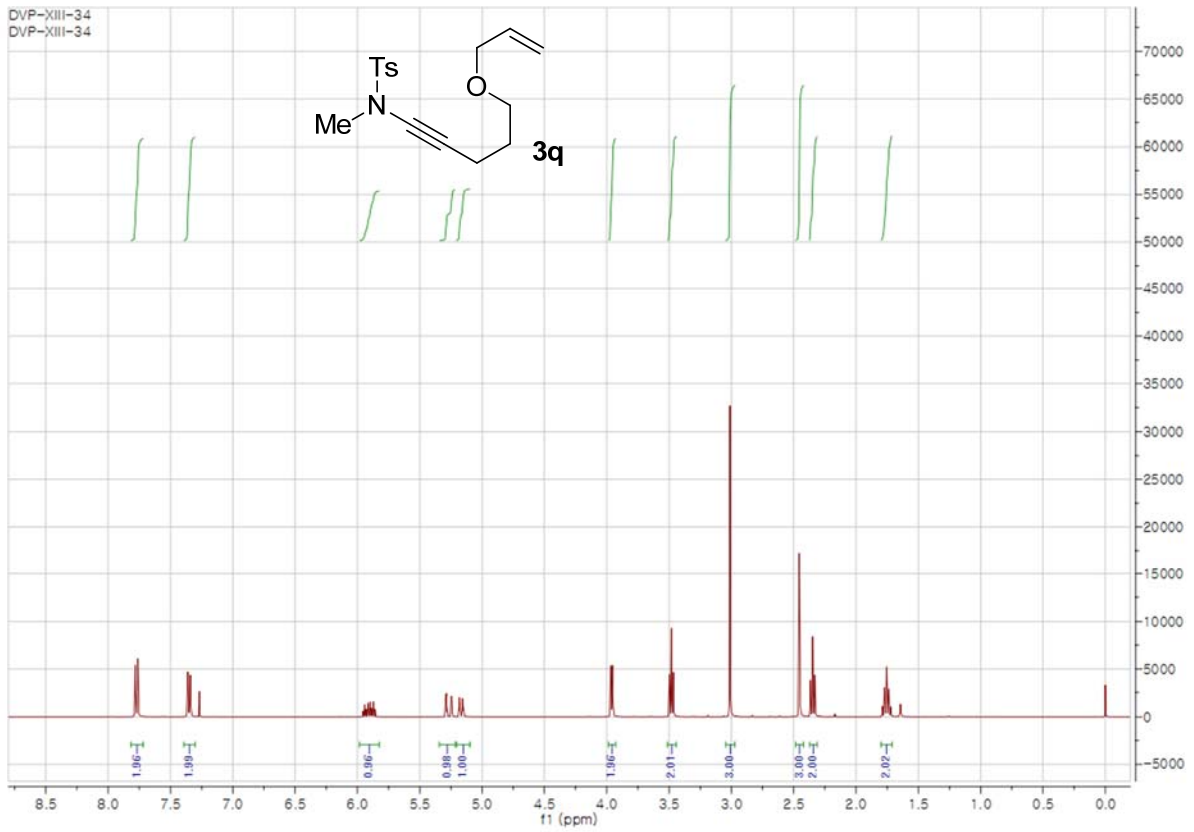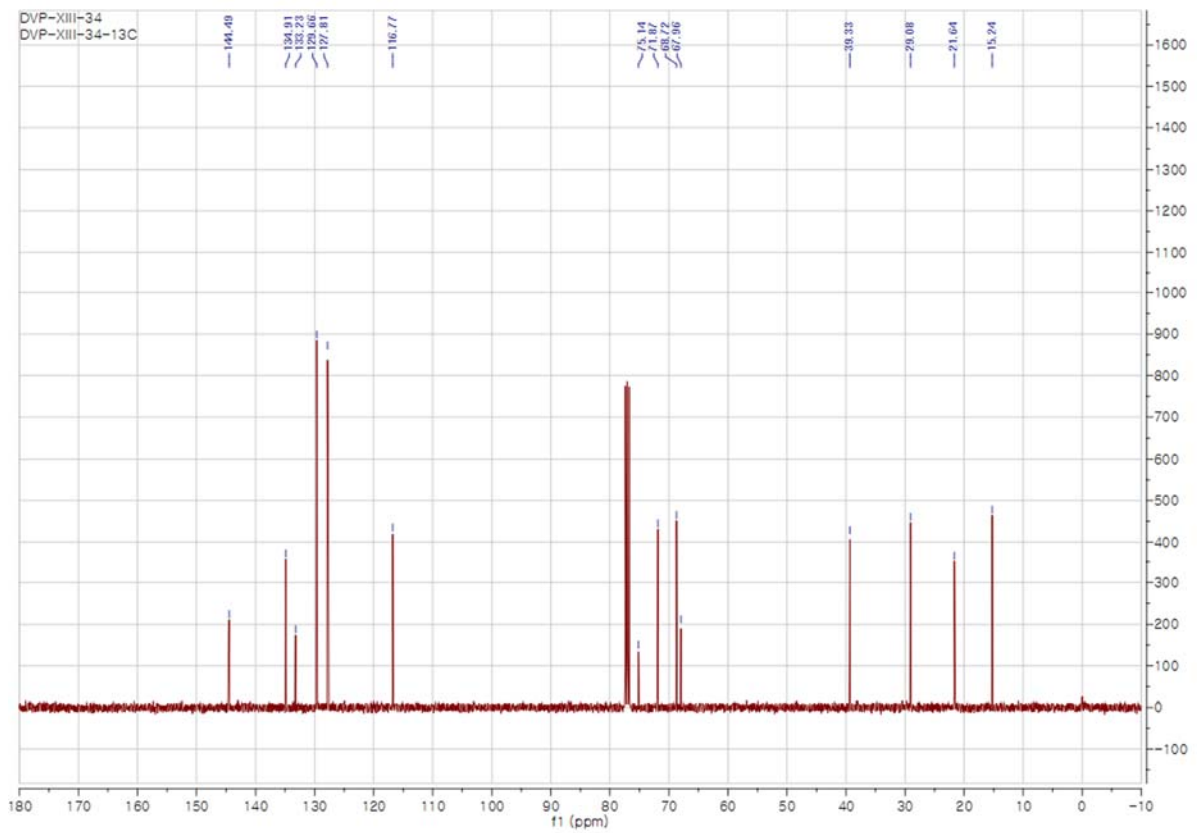

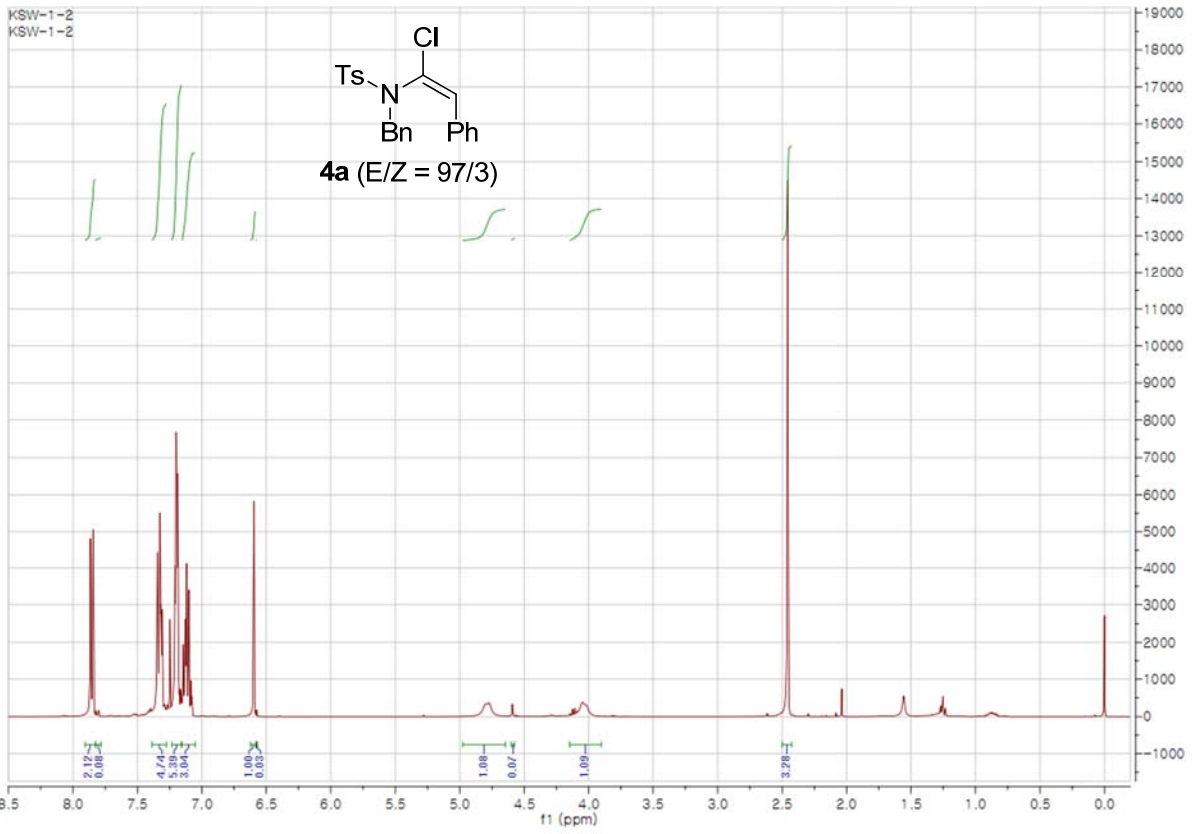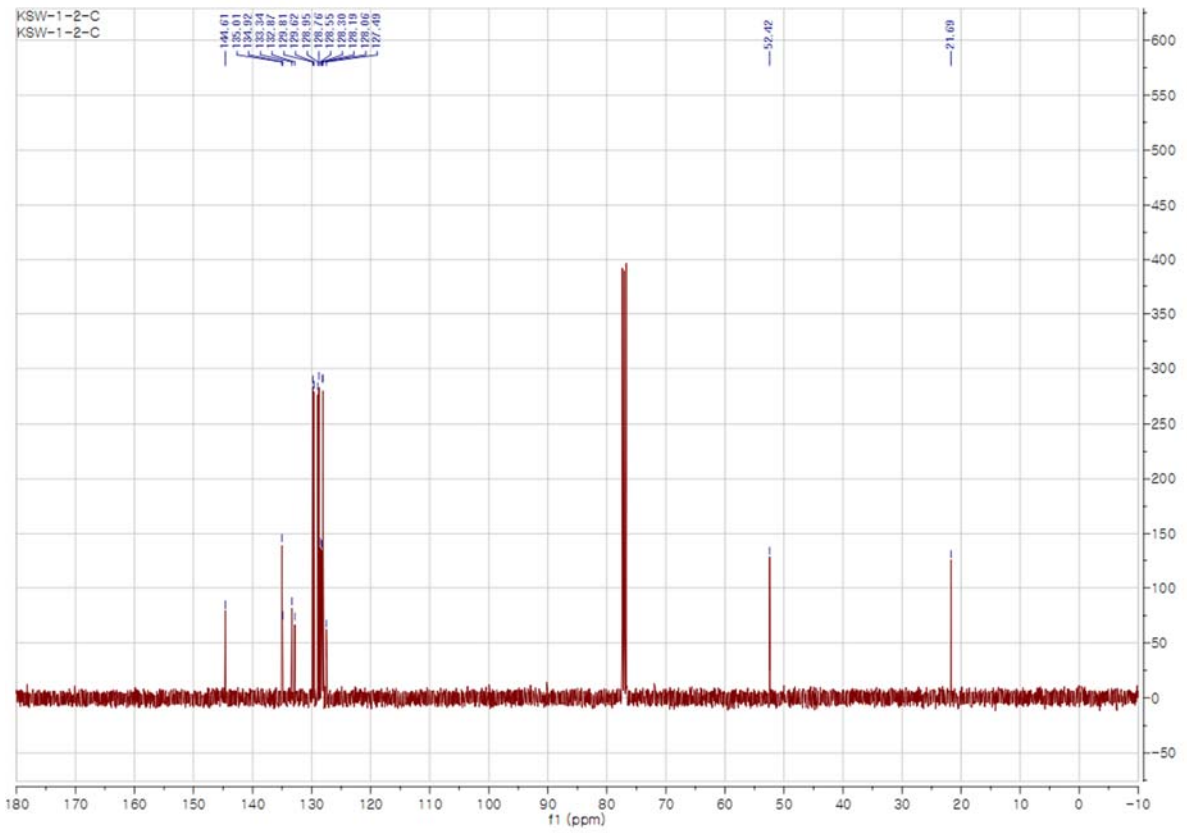

KSW-CC-4b  
KSW-CC-4b

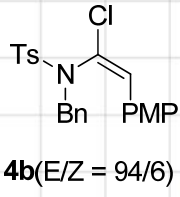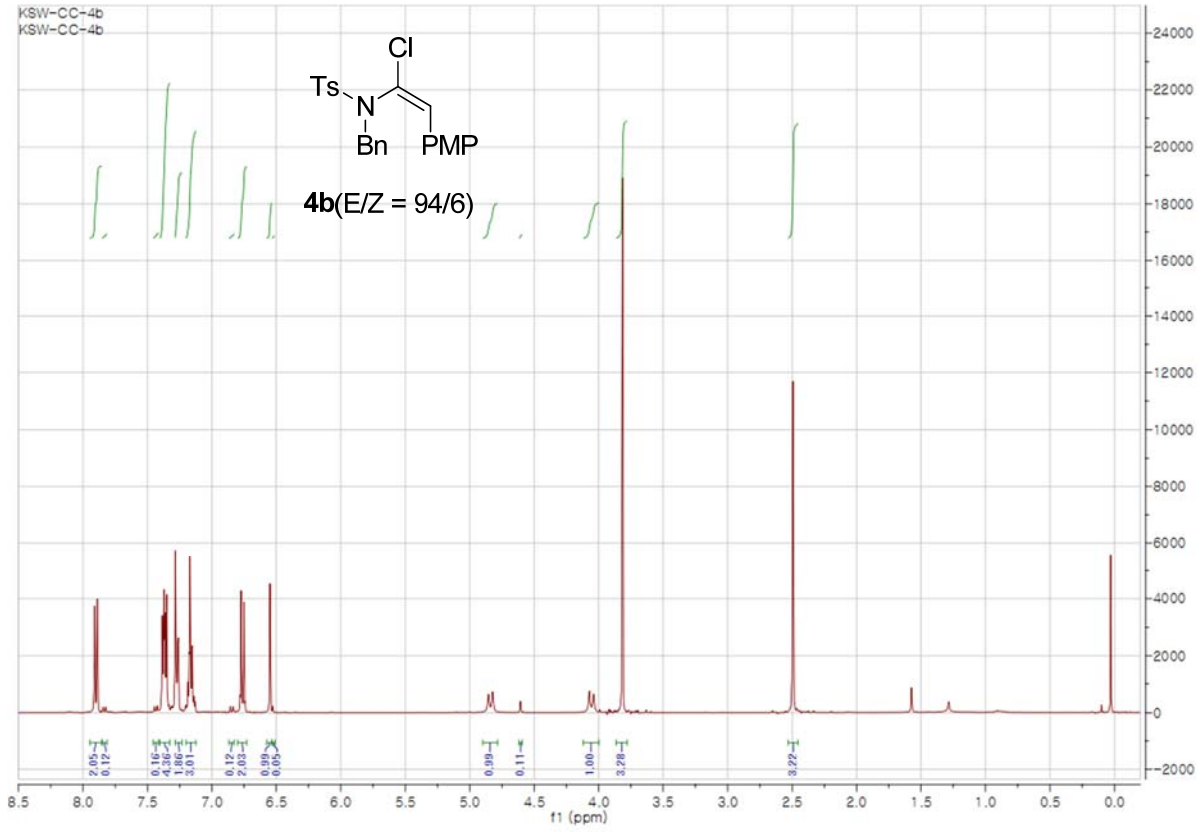

KSW-III-63A  
KSW-III-63A-C

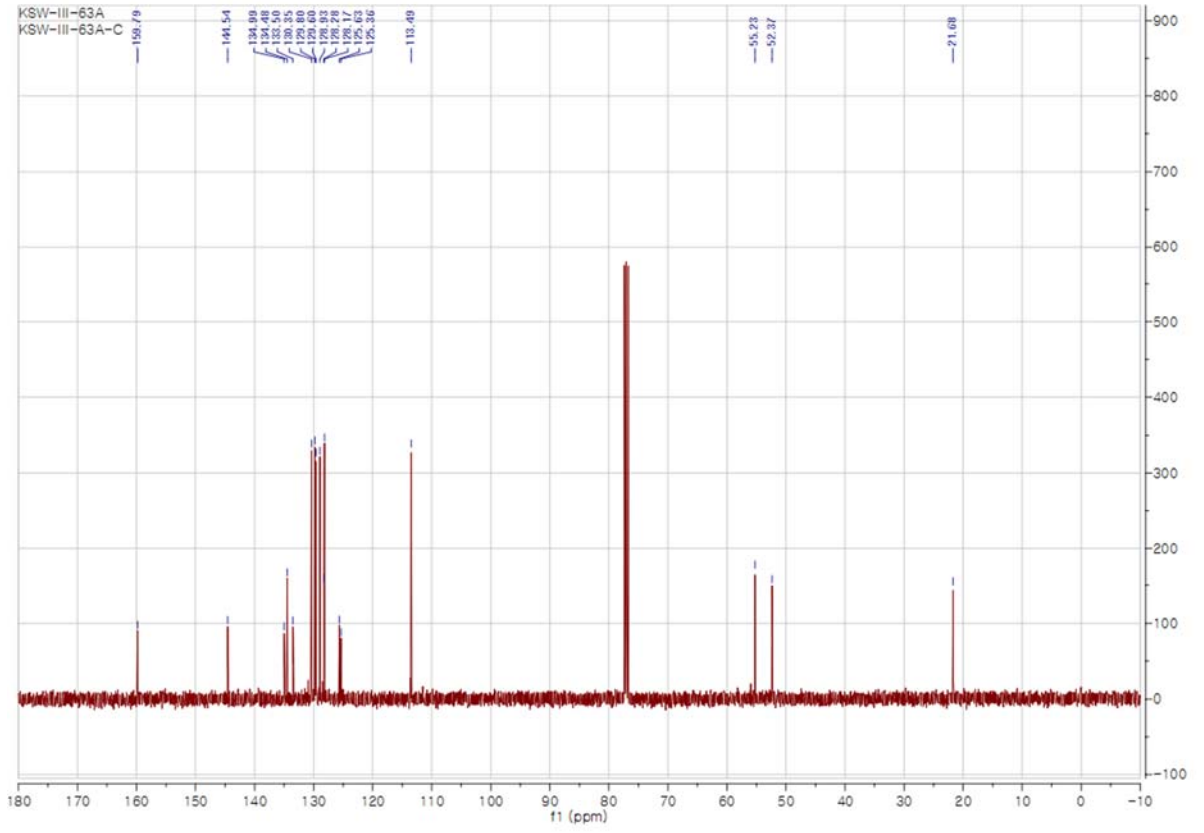

KSW-1-13-P  
KSW-1-13-P

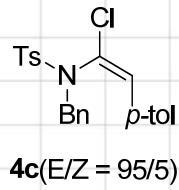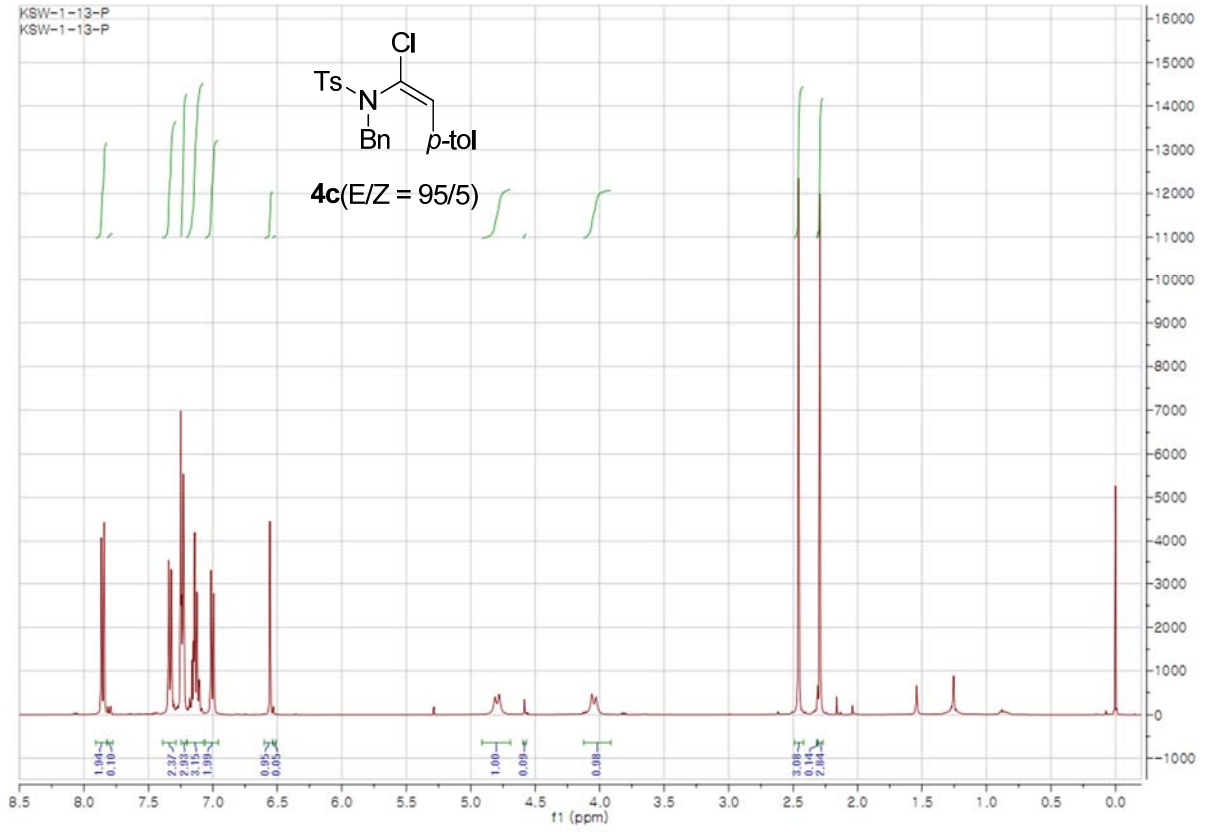

KSW-III-63B  
KSW-III-63B-C

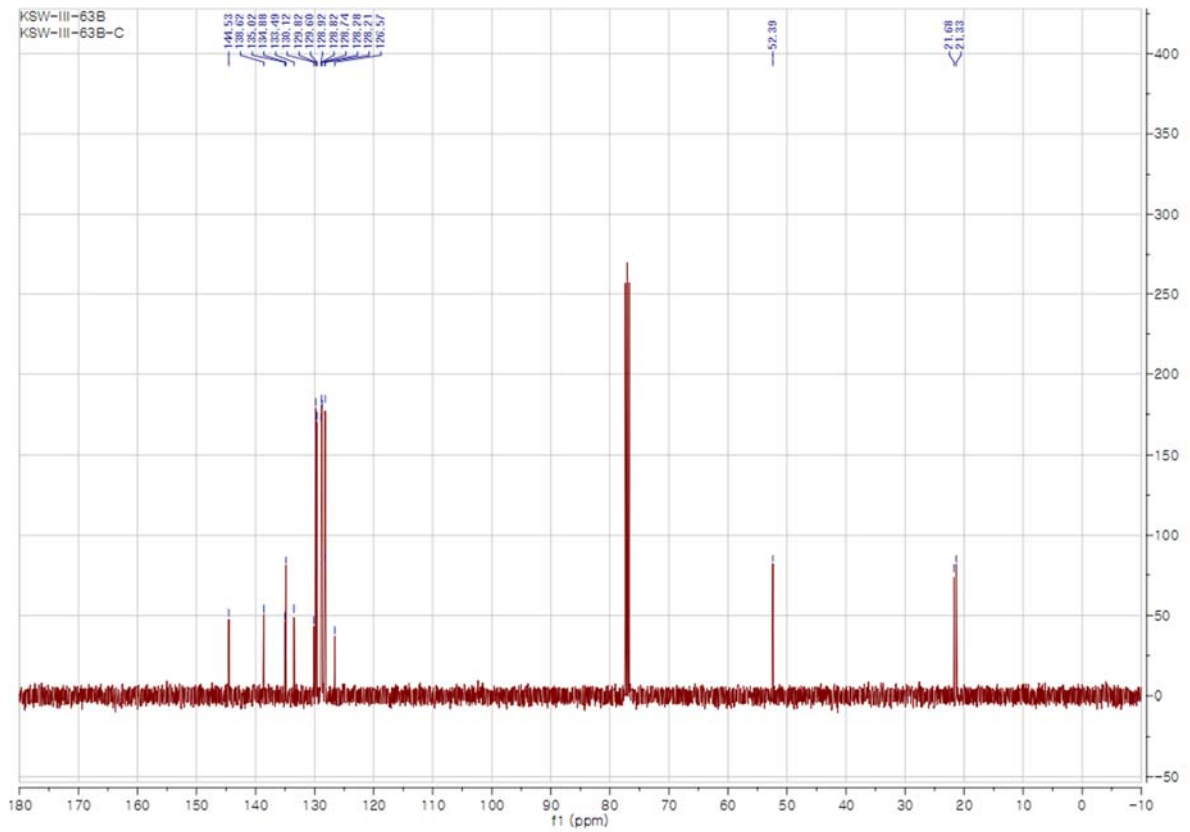

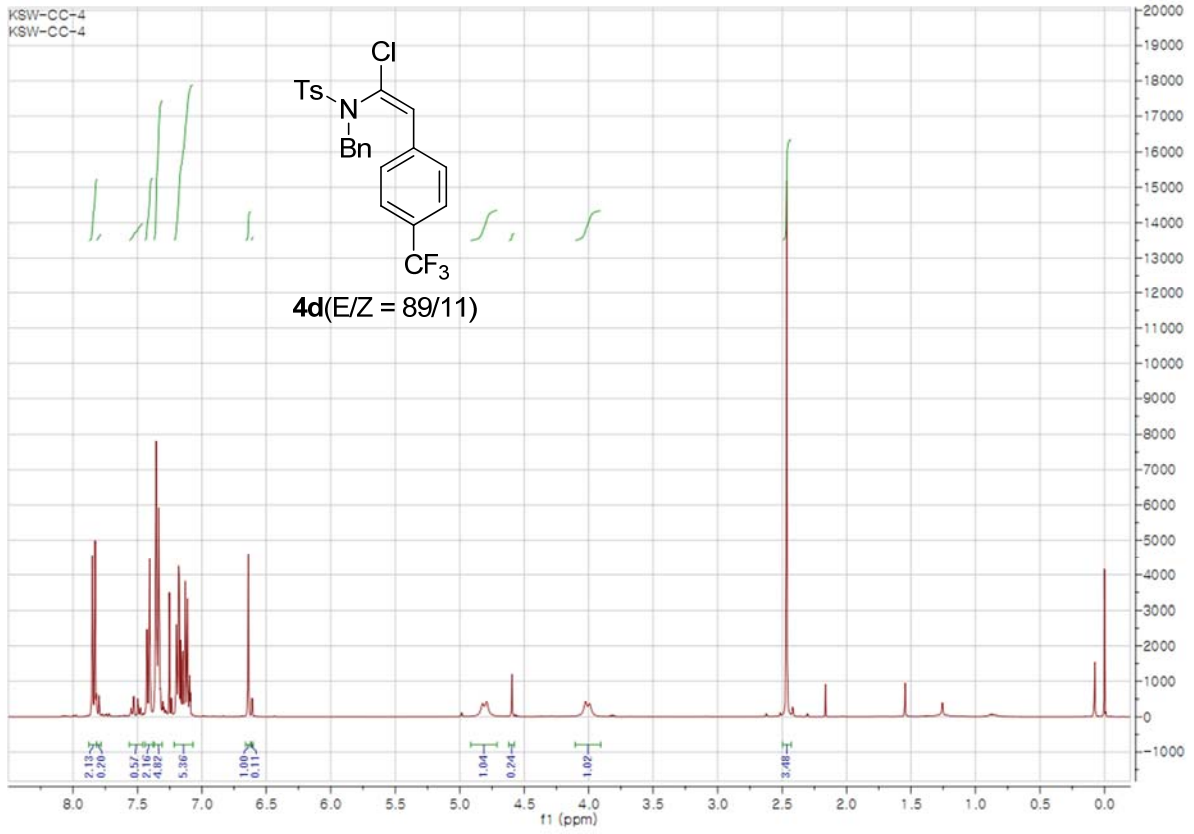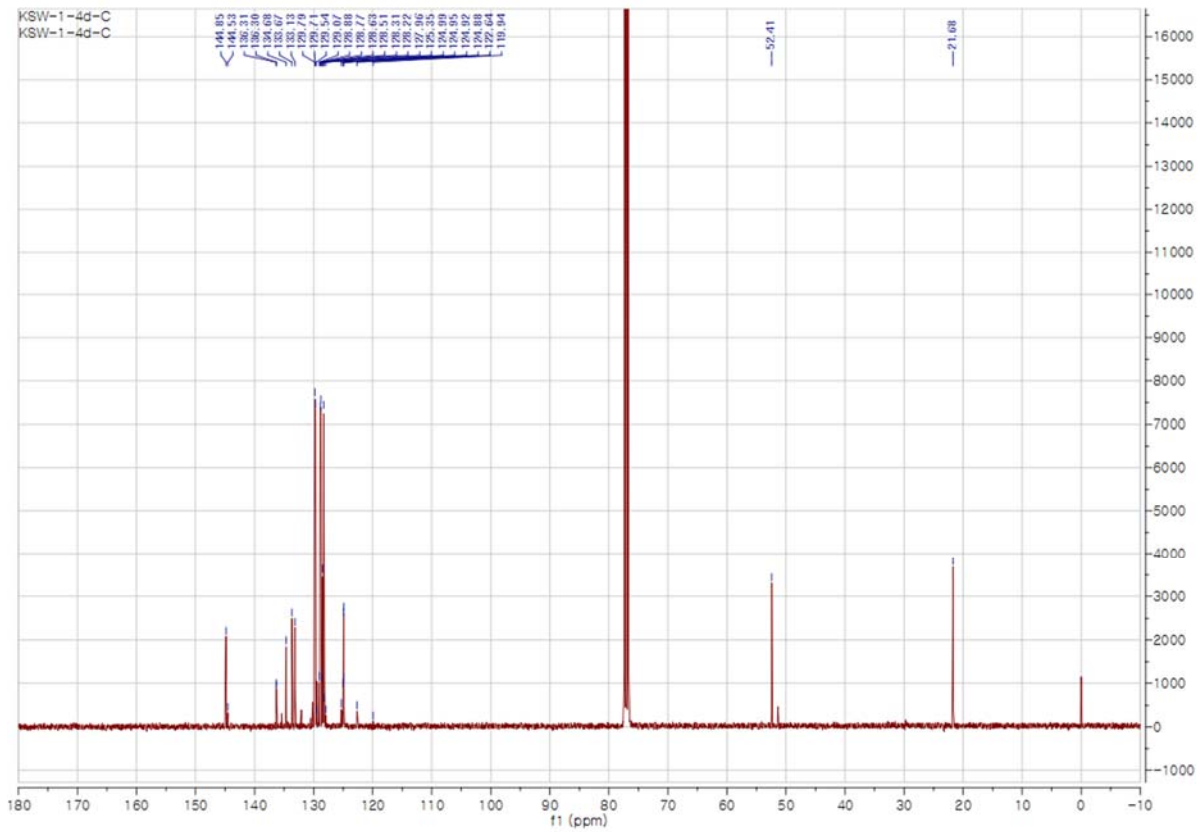

KSW\_4e  
KSW-1-4h

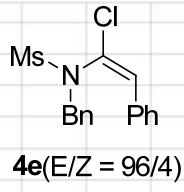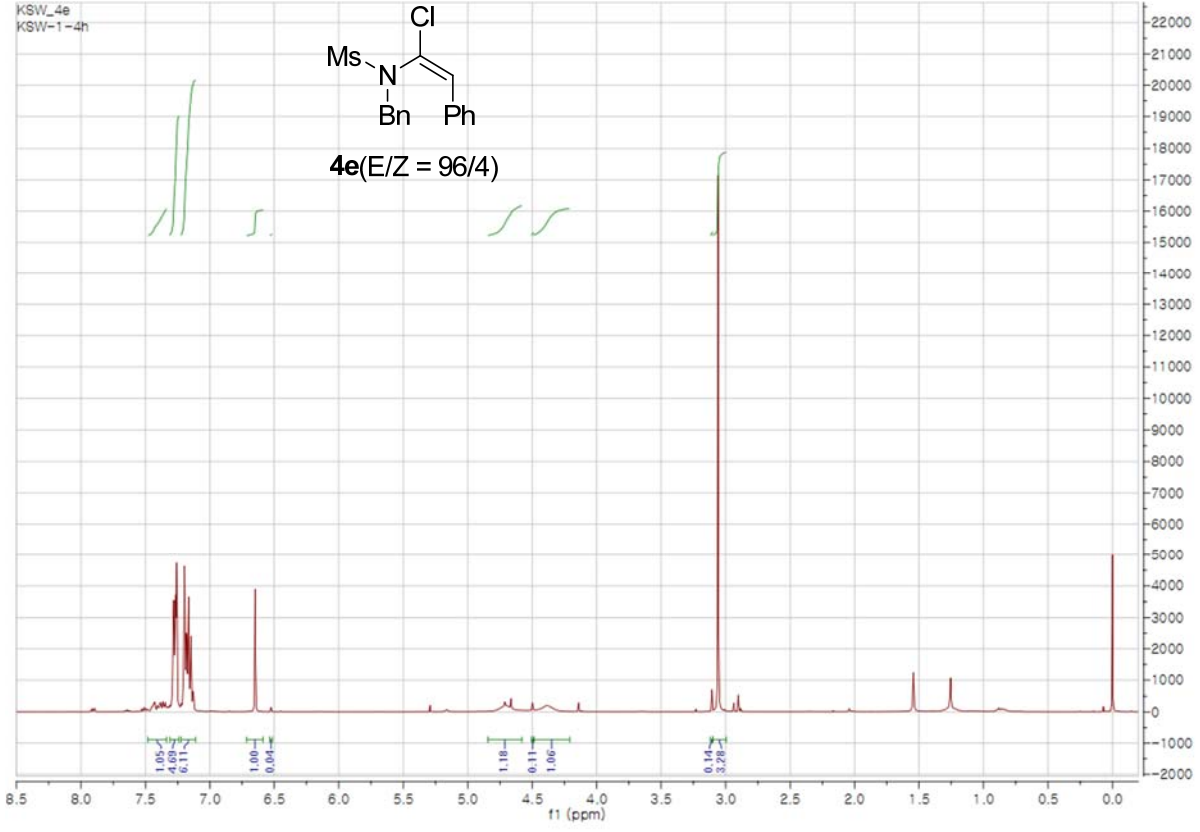

KSW-1-3-P  
KSW-1-3-P-C

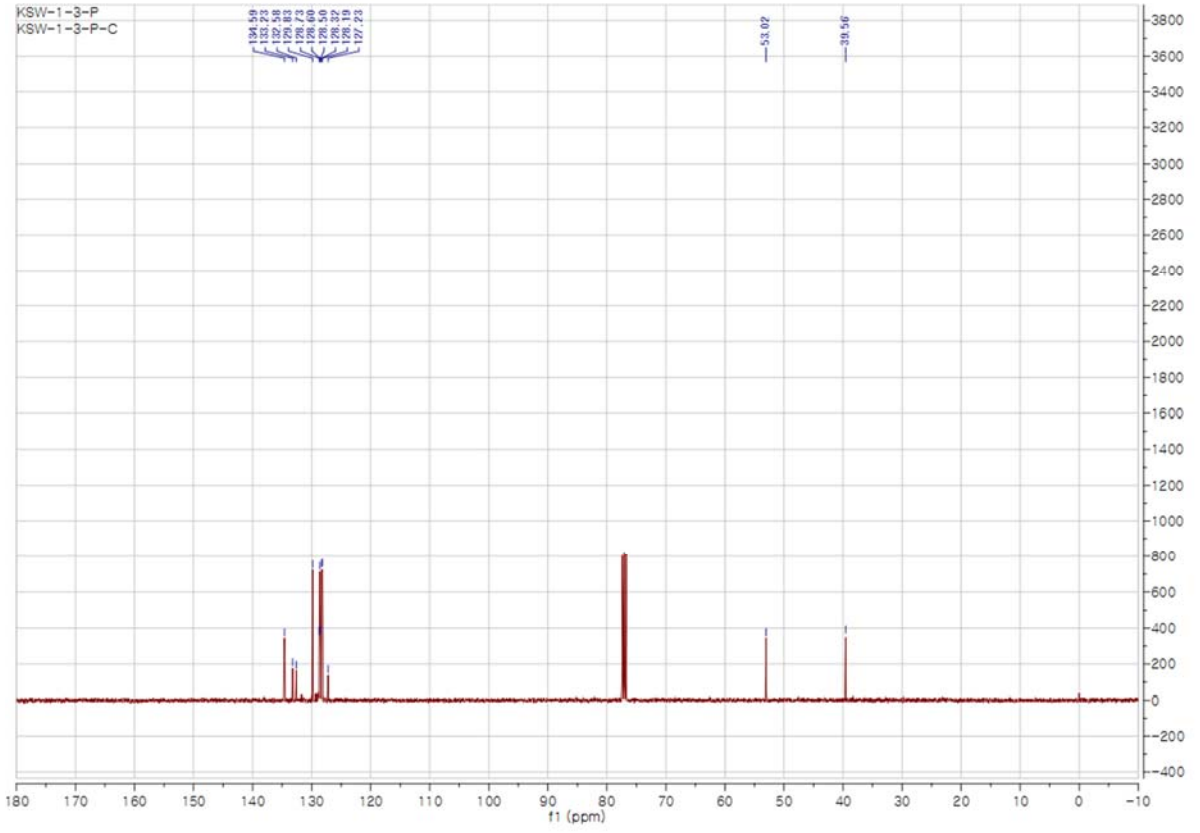



KSW-CC-4f  
KSW-CC-4f

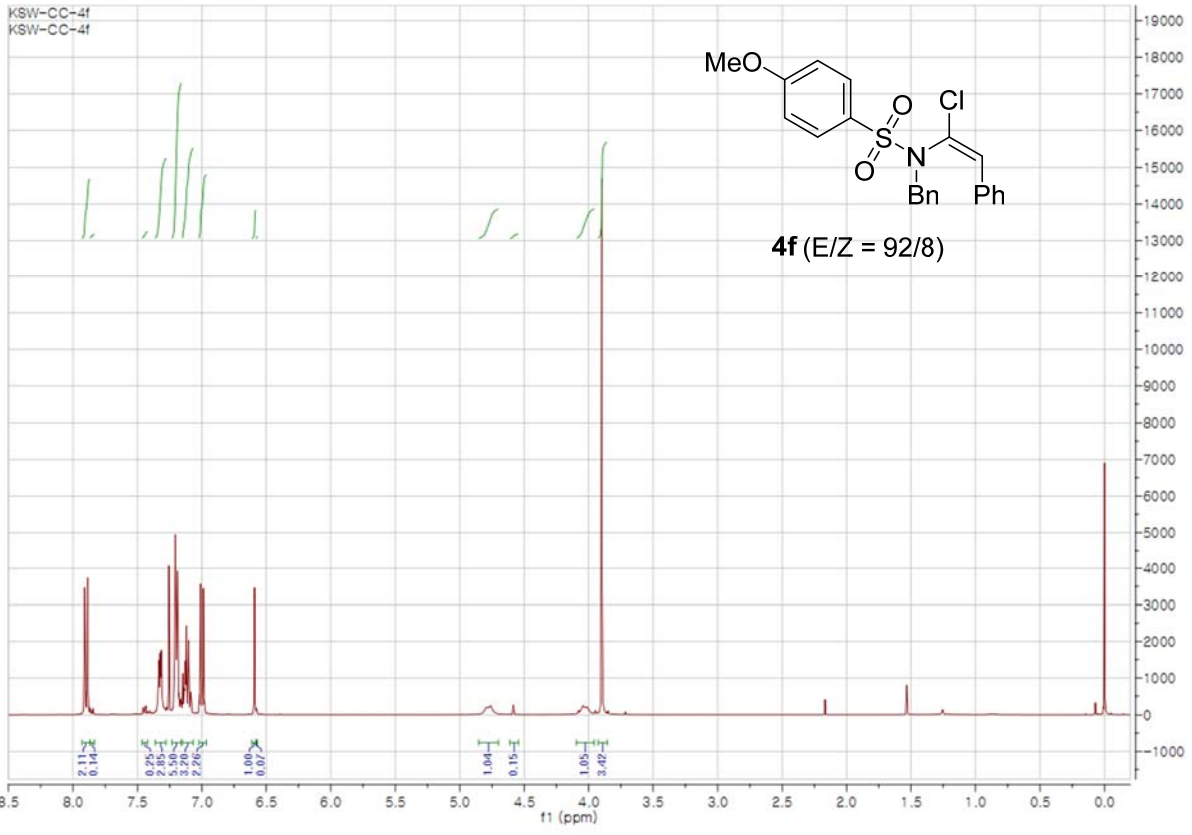

KSW-1-f  
KSW-1-f-C

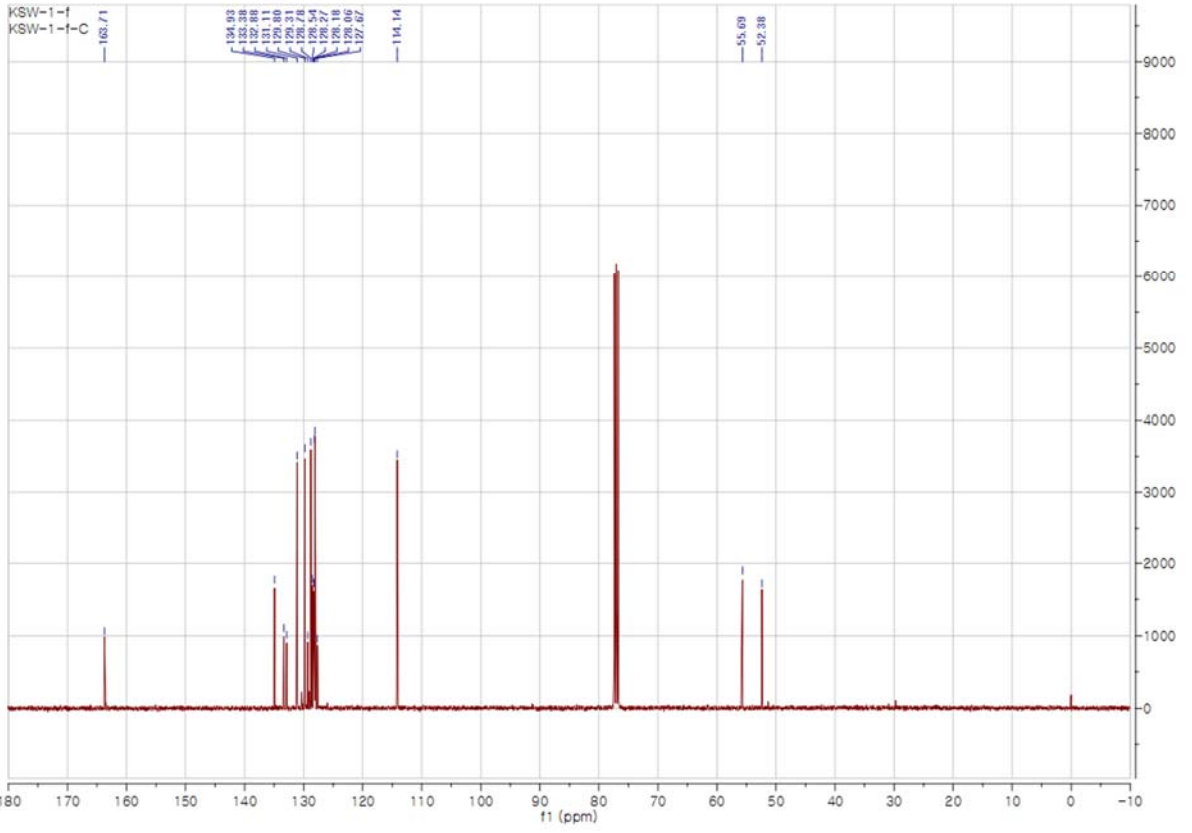

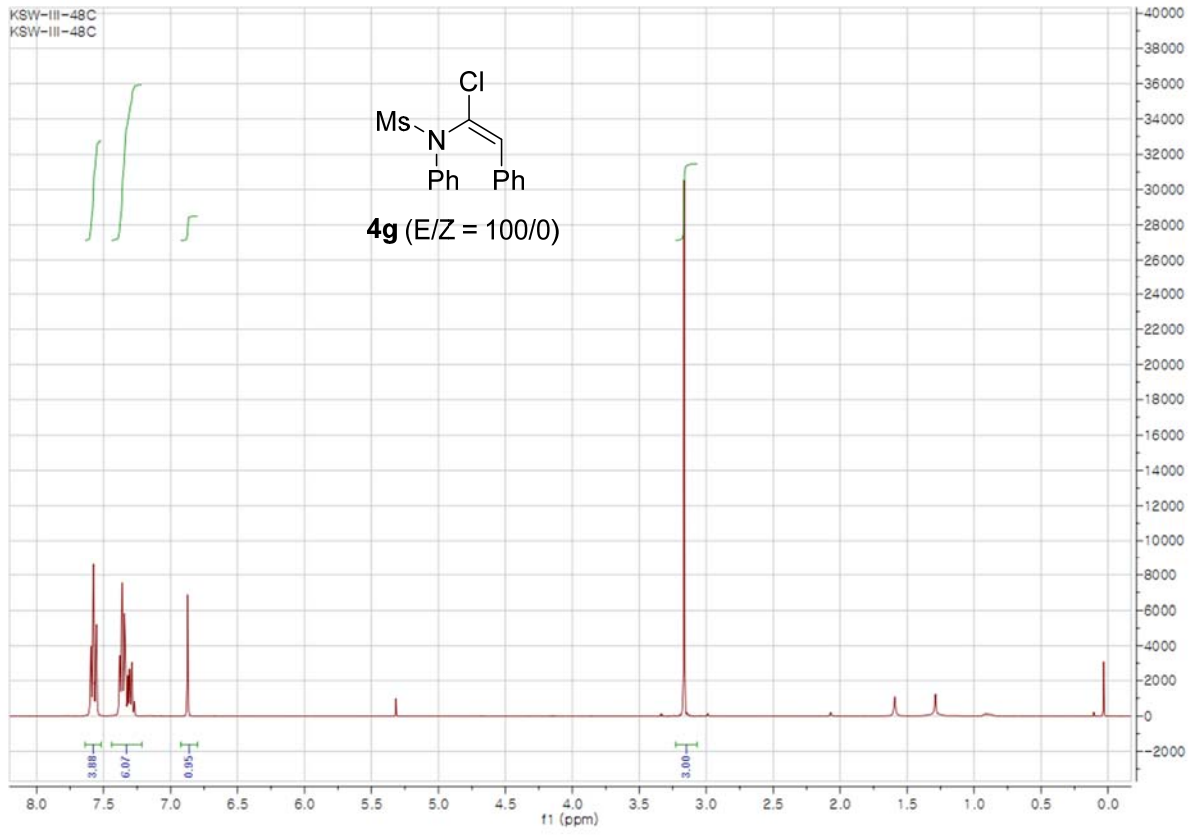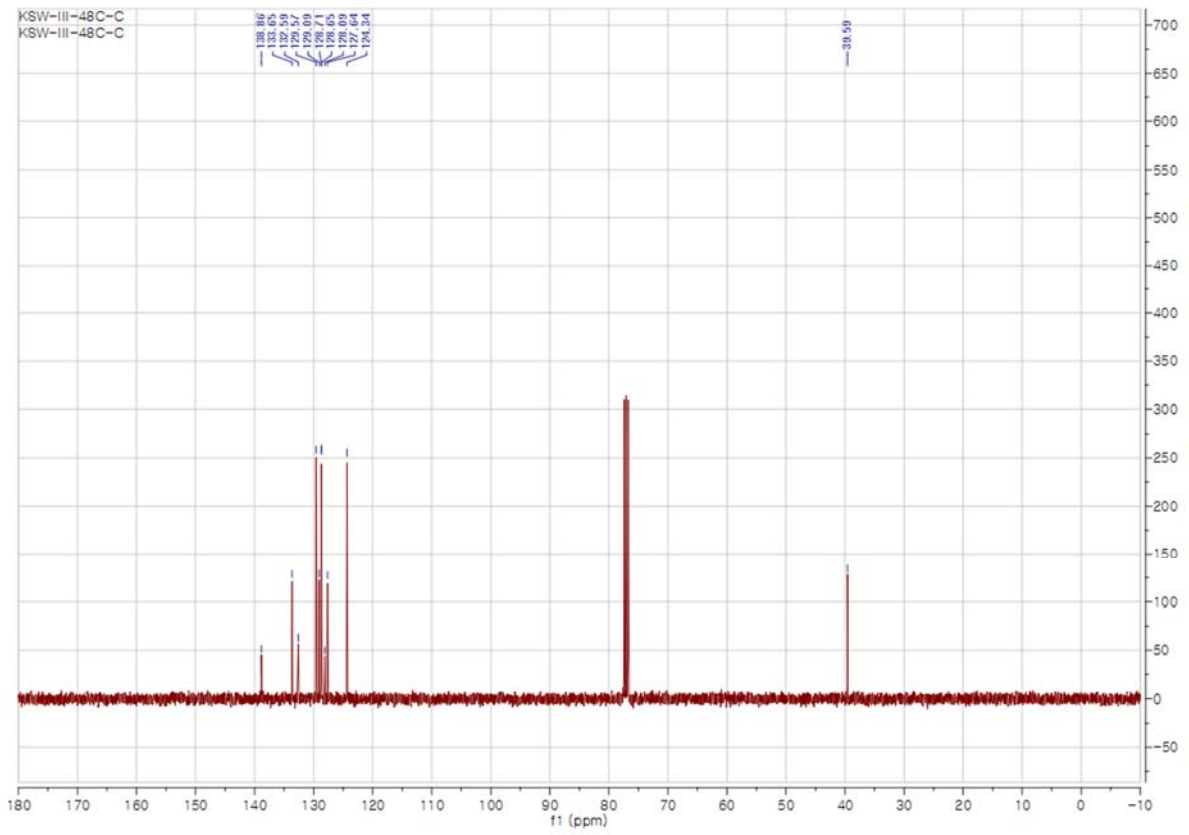

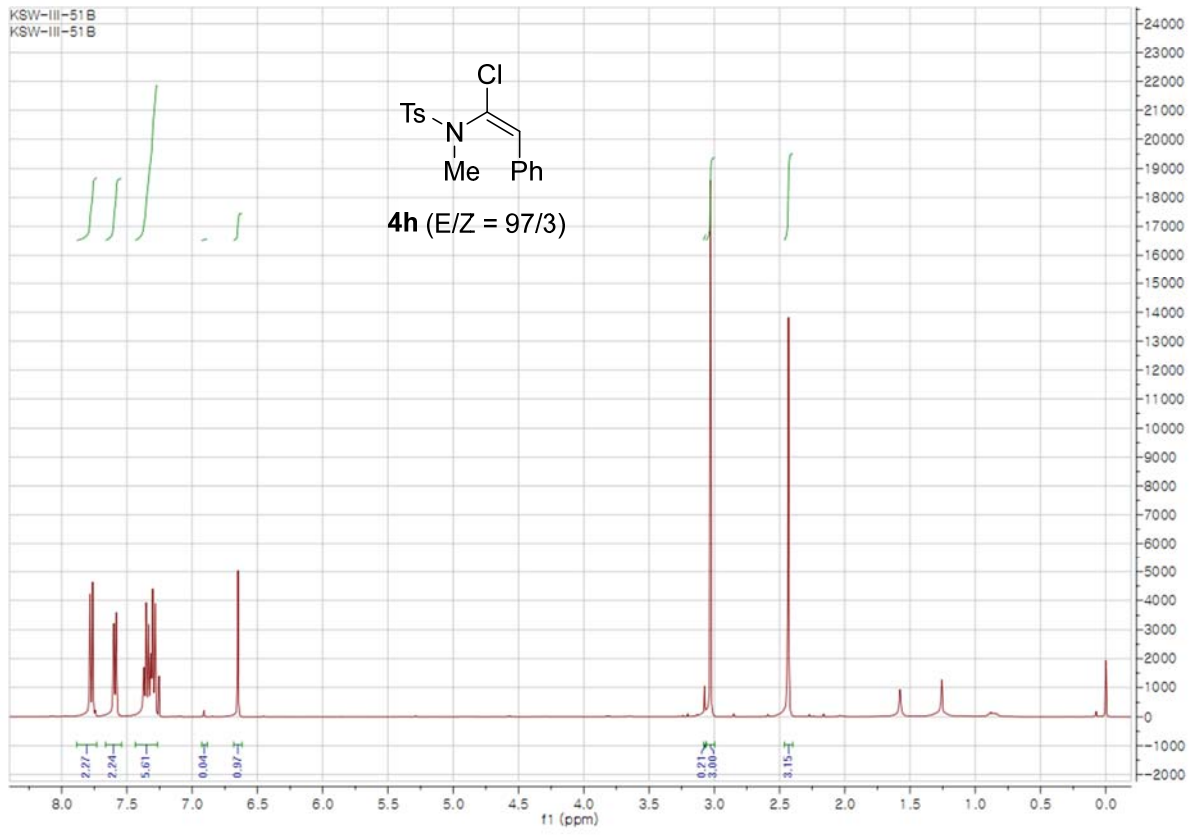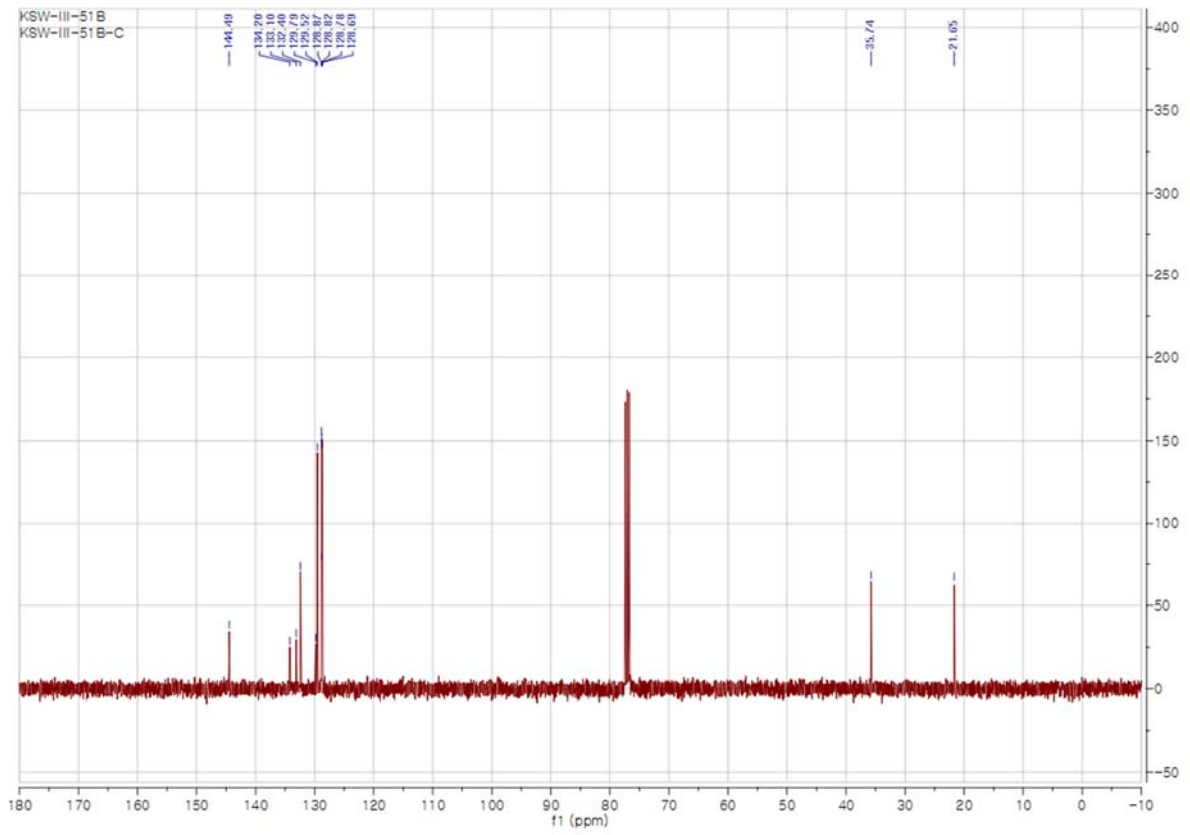

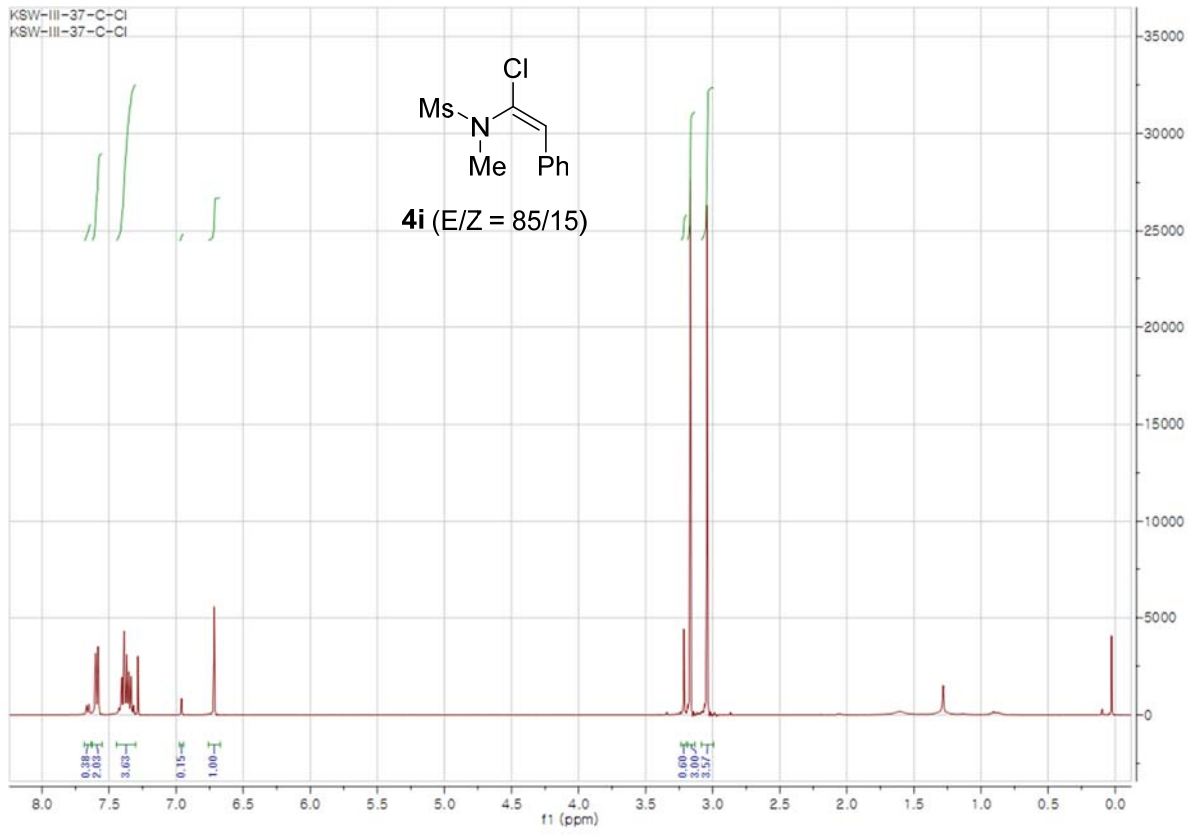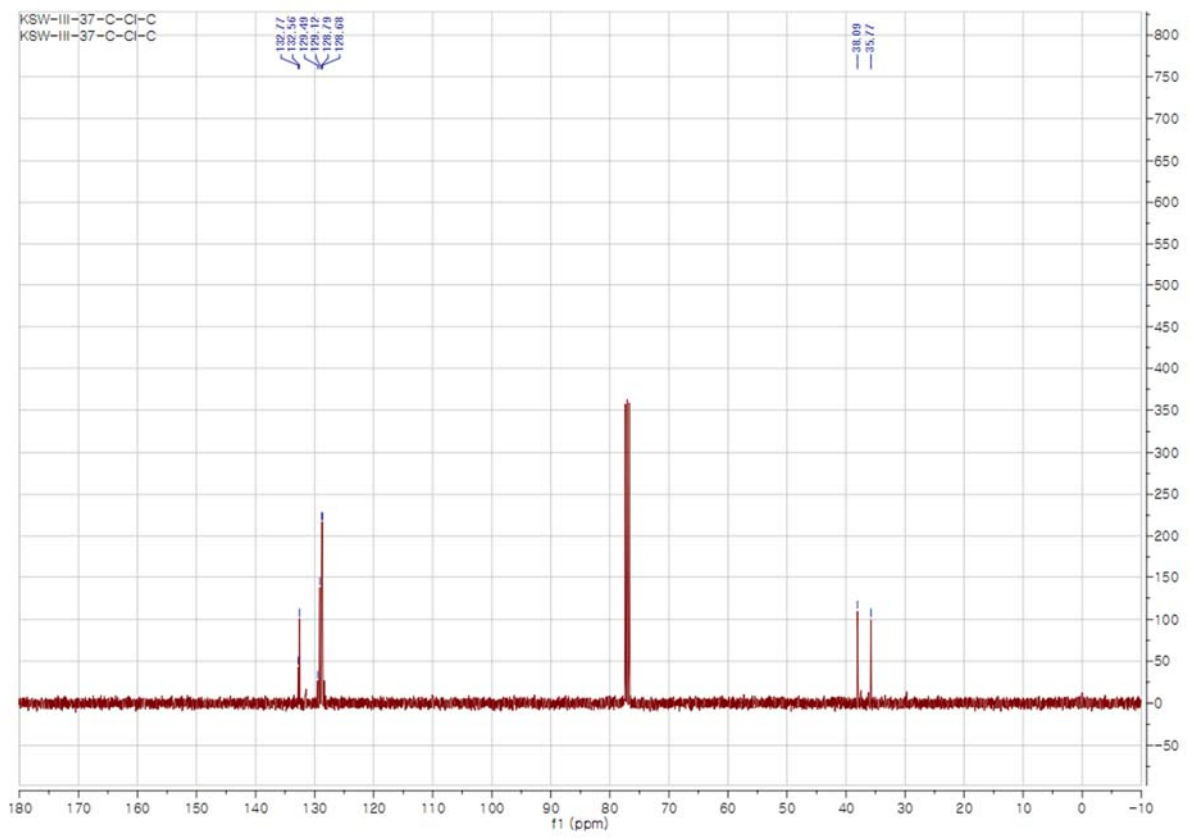

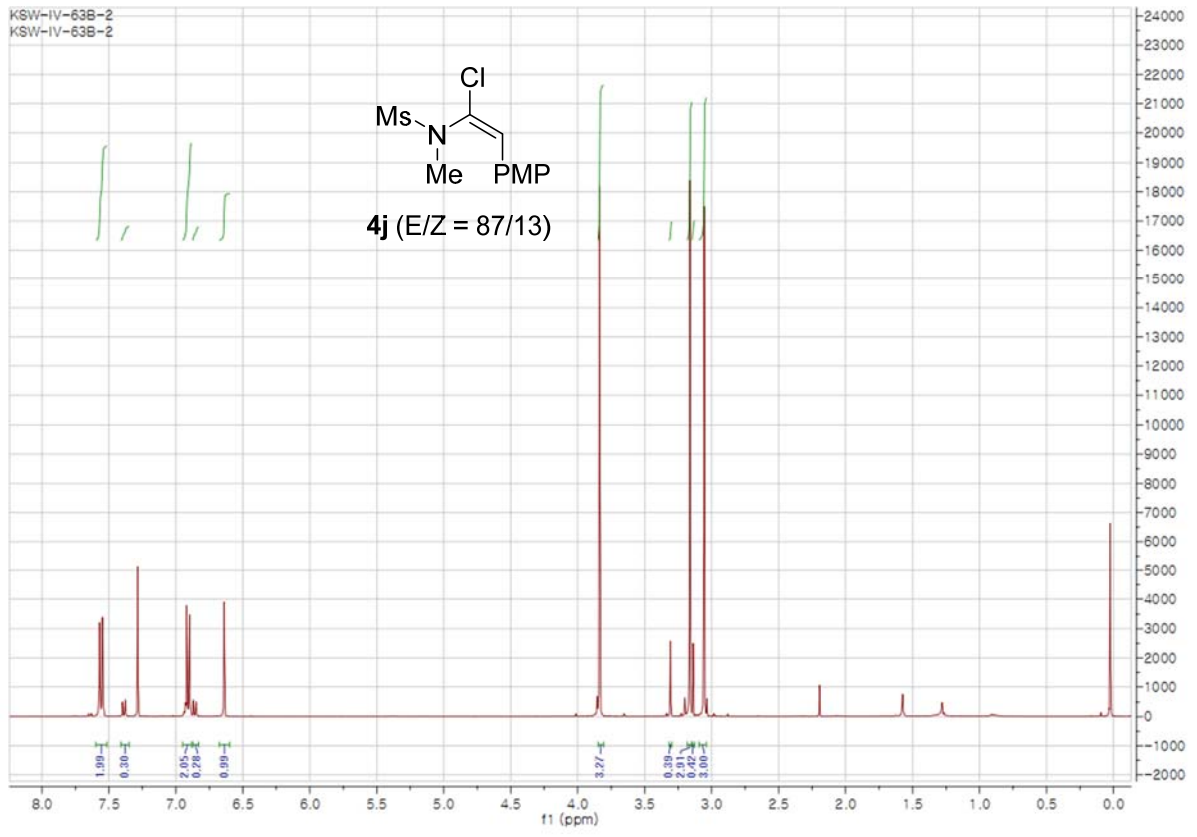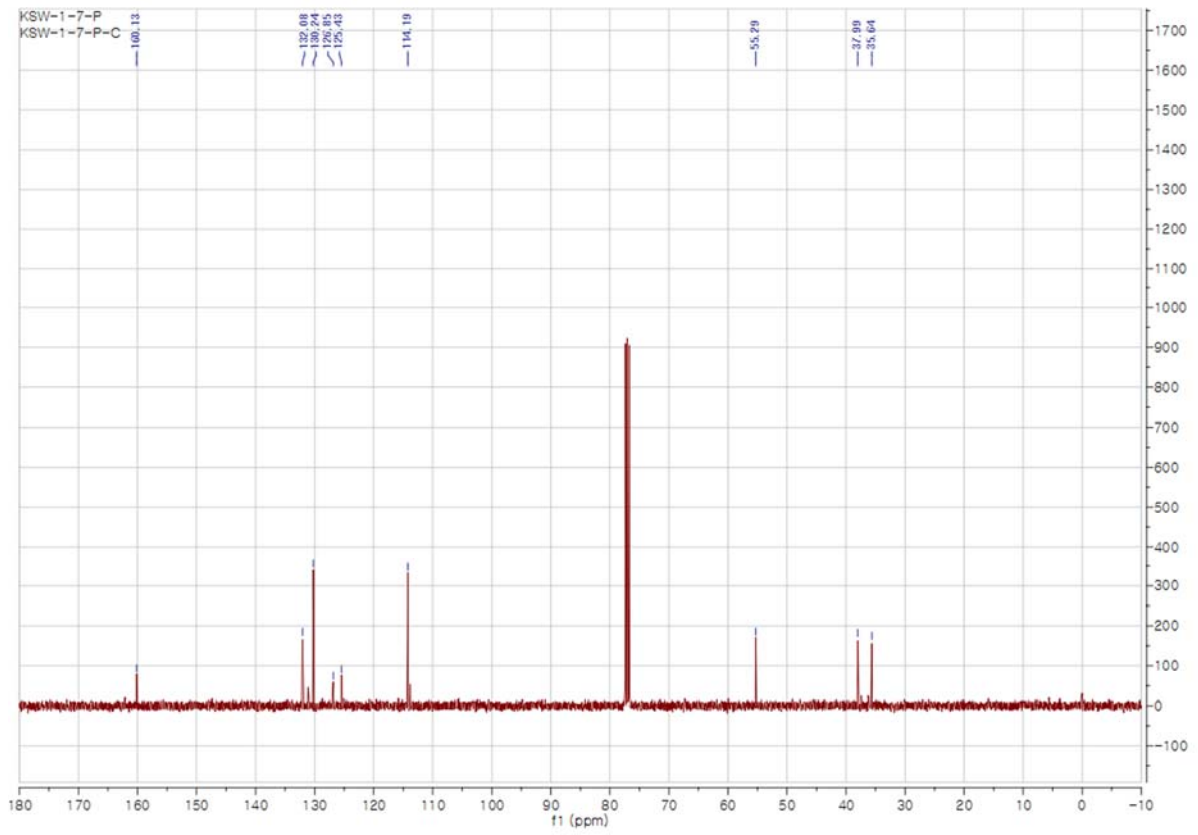

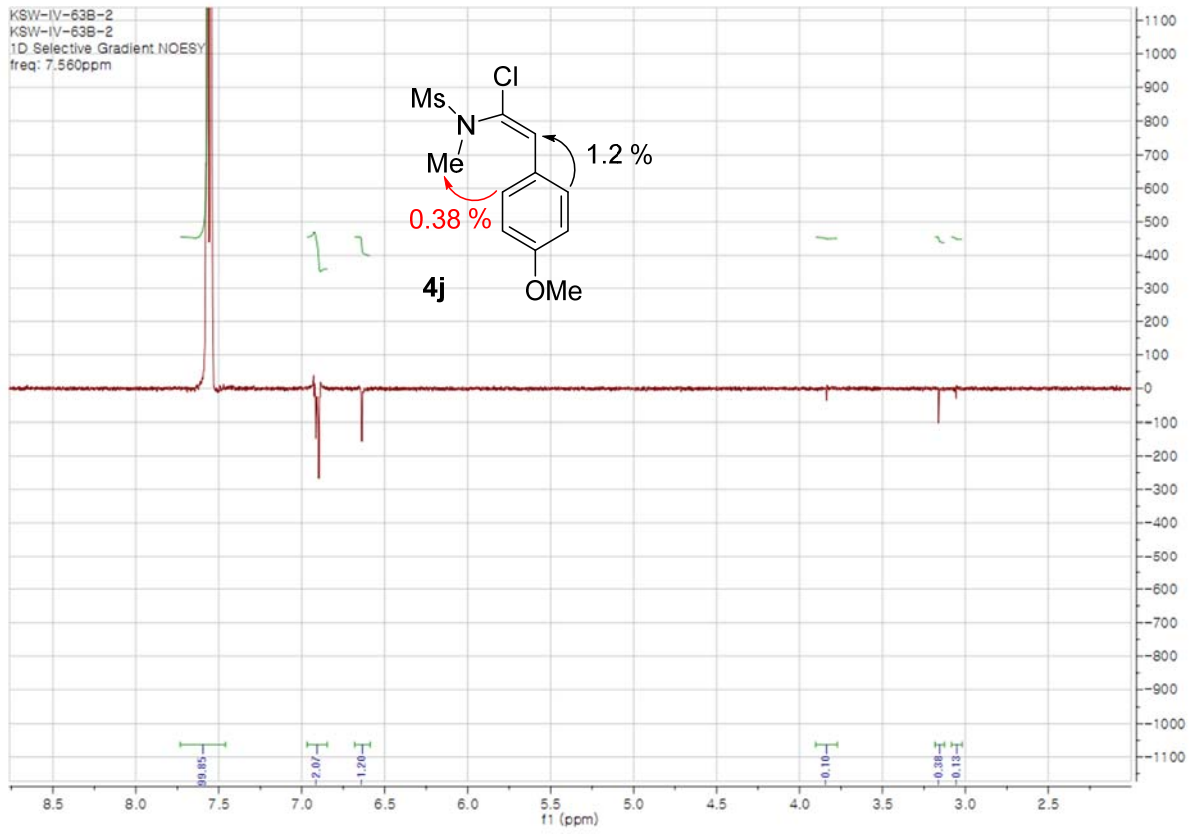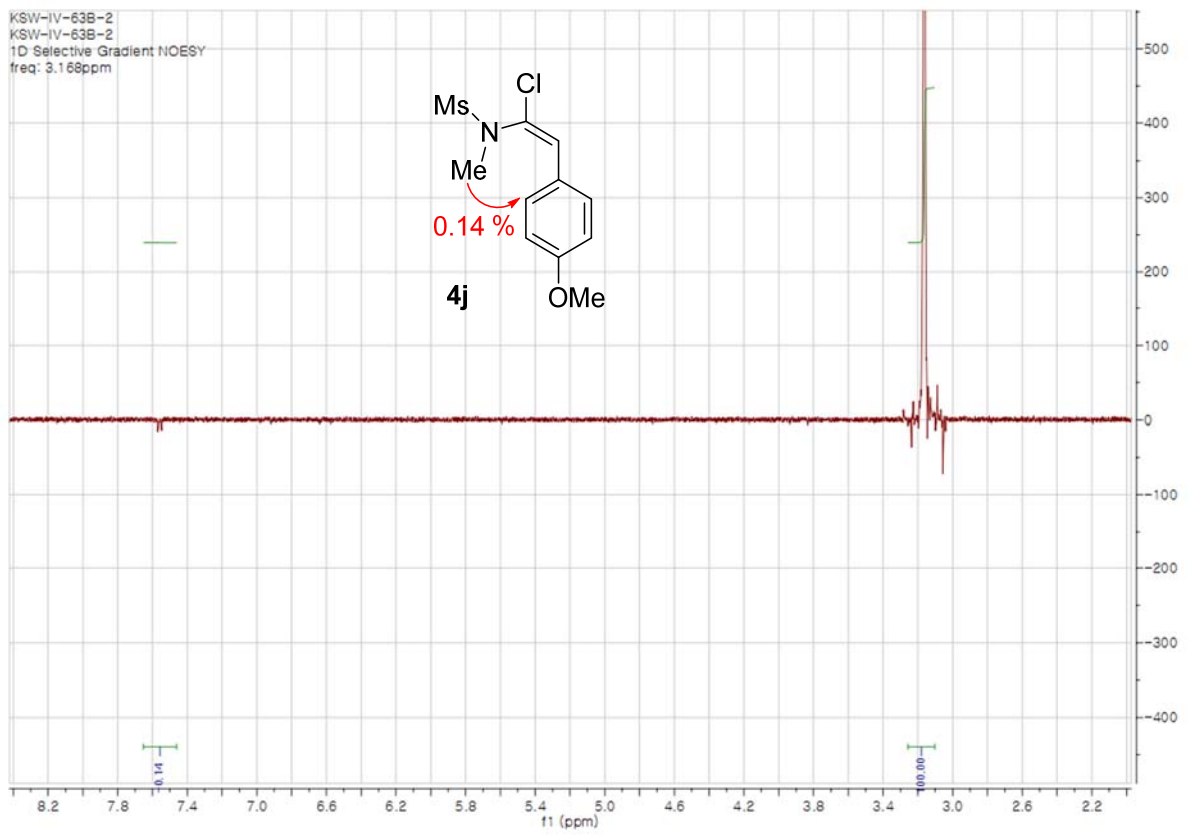

KSW-1-18-P  
KSW-1-18-P

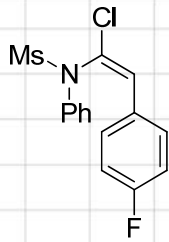

4k (E/Z = 100/0)

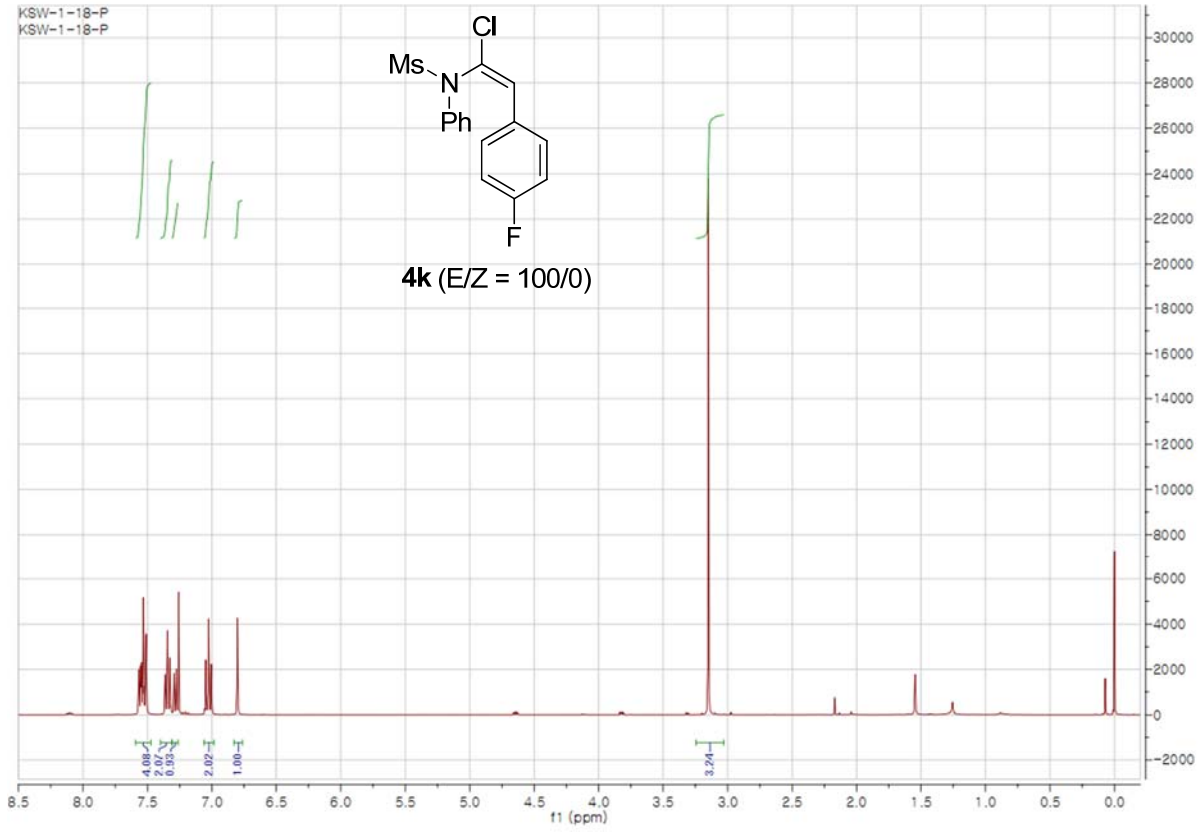

KSW-1-k  
KSW-1-k-C

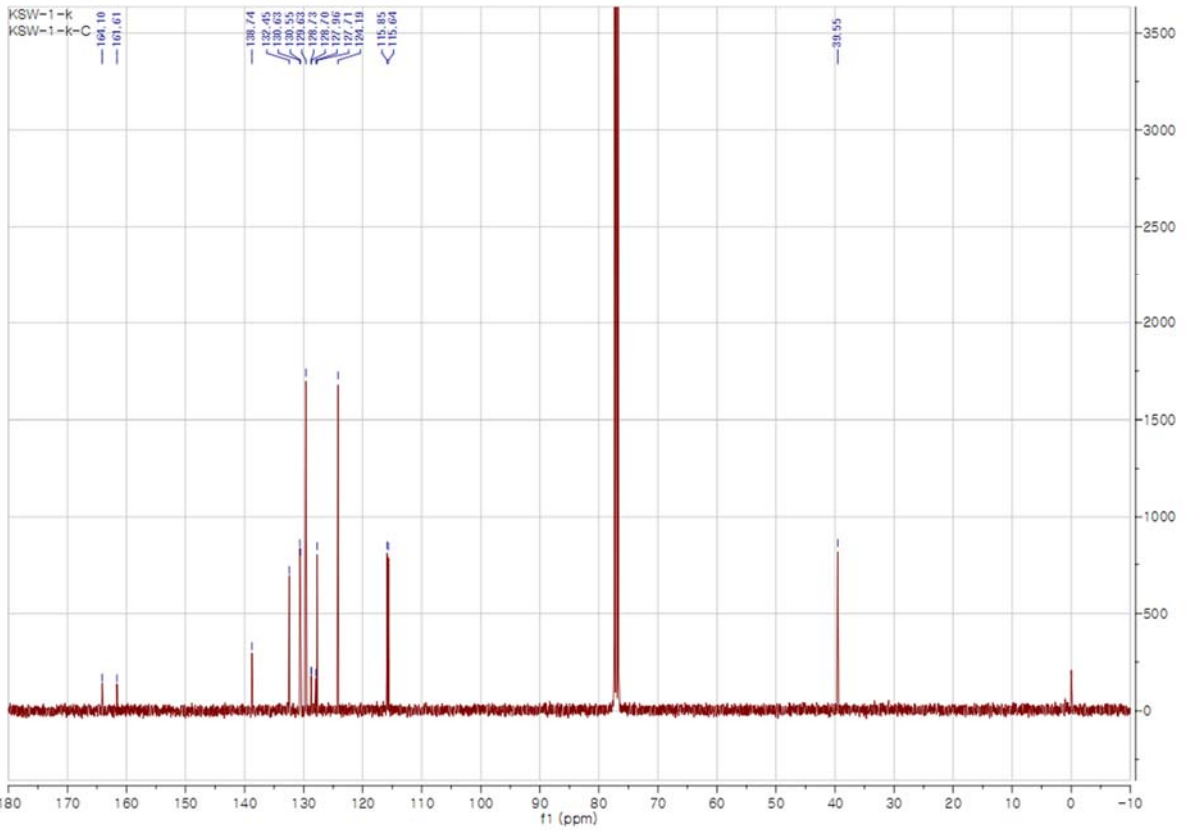

KSW-1-9-P  
KSW-1-9-P

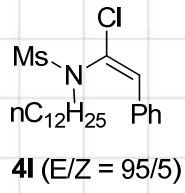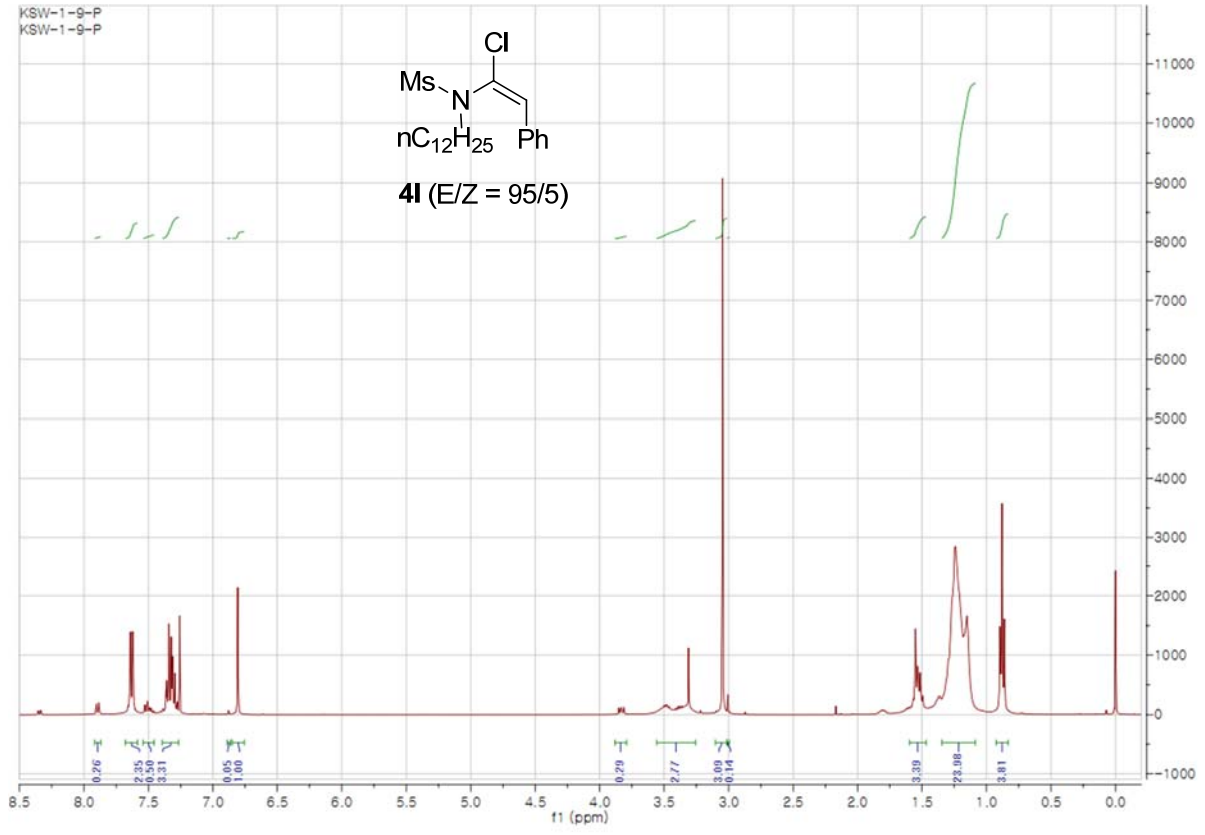

KSW-1-9-P  
KSW-1-9-P-C

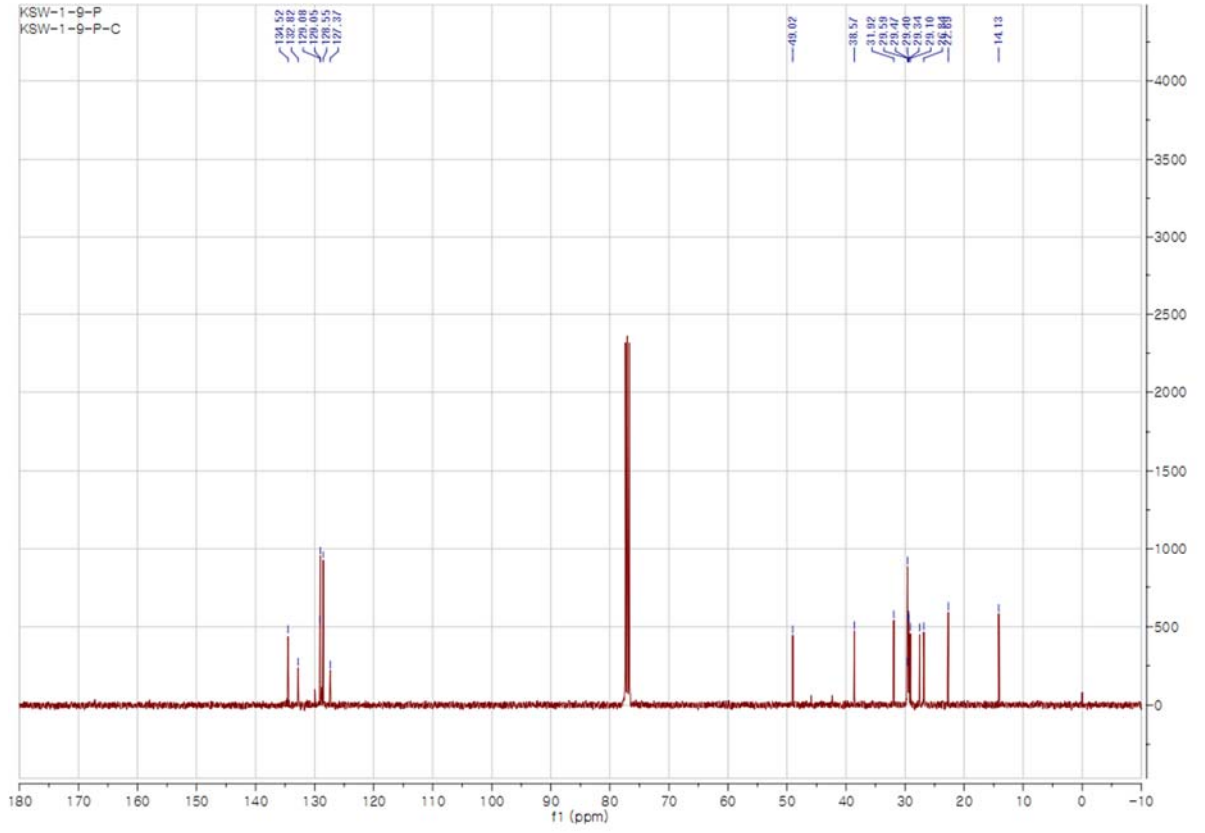



KSW-III-37-B-Cl  
KSW-III-37-B-Cl

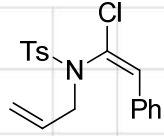

4m (E/Z = 93/7)

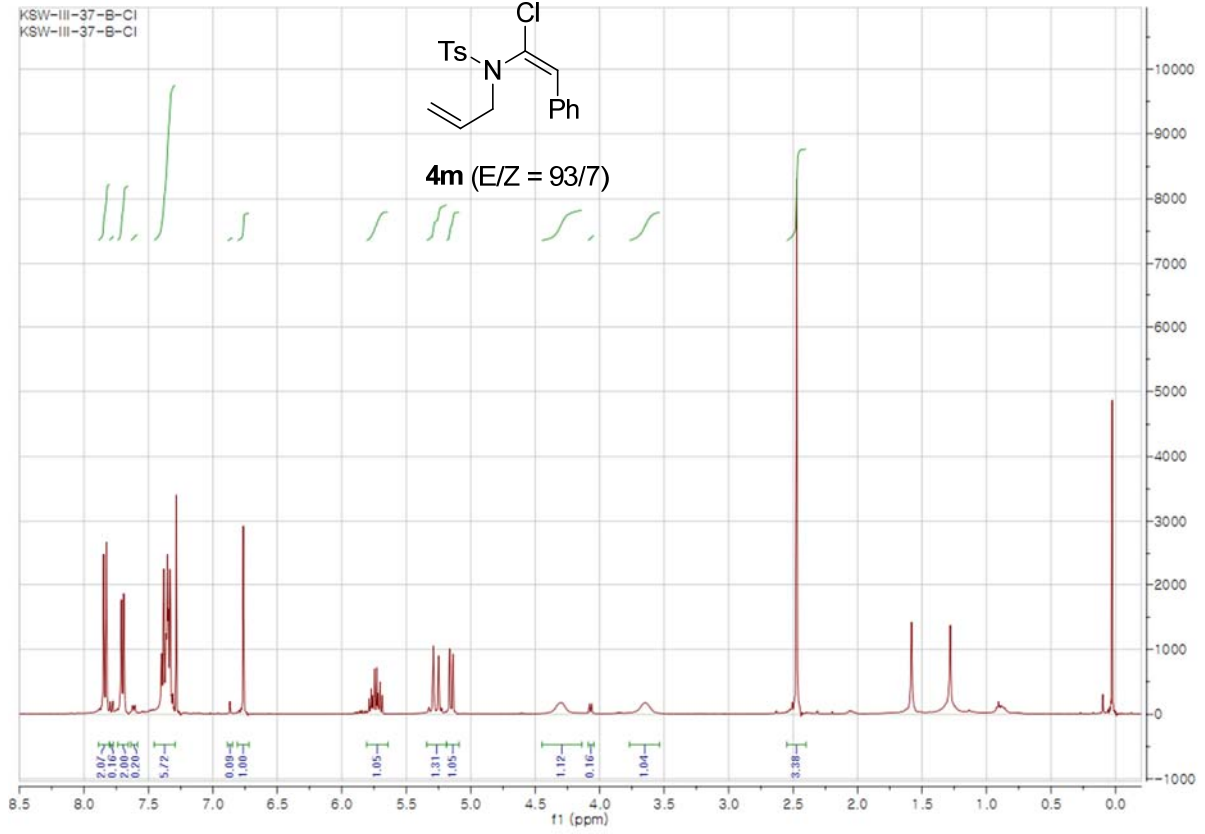

KSW-1-m  
KSW-1-m-C

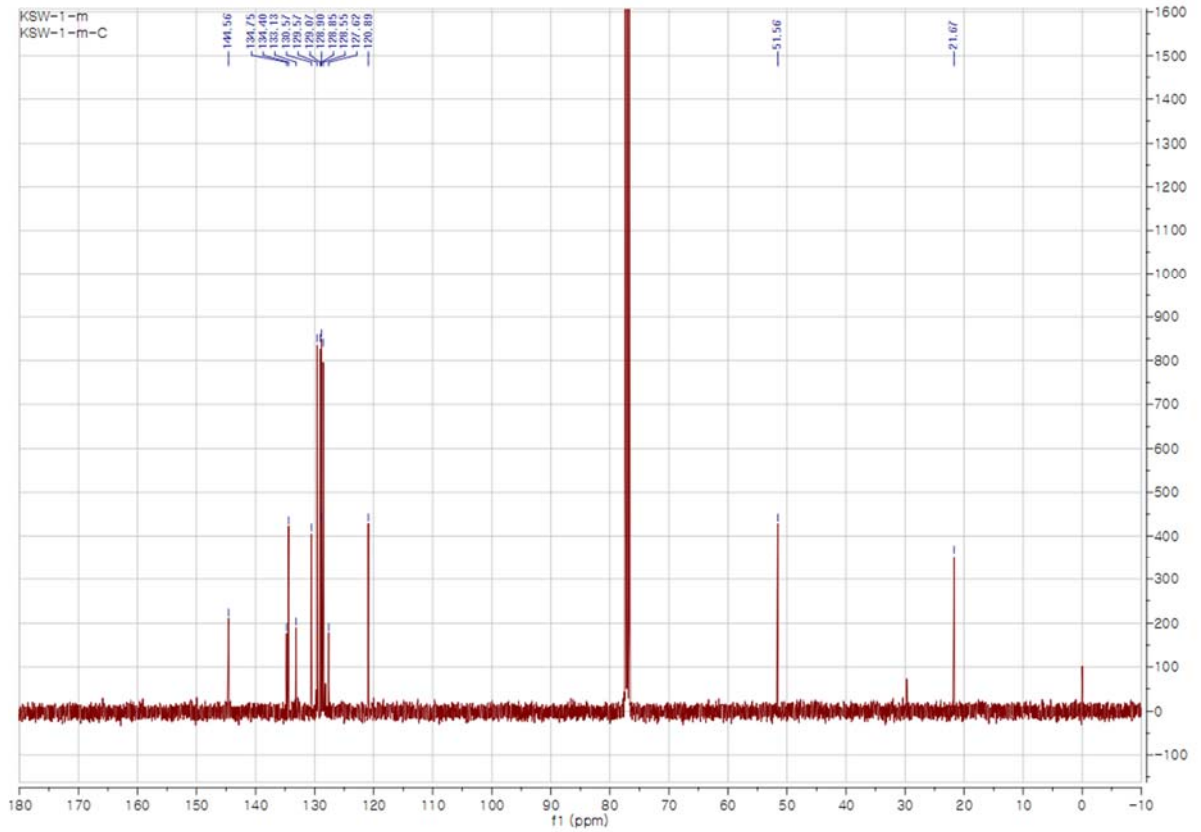

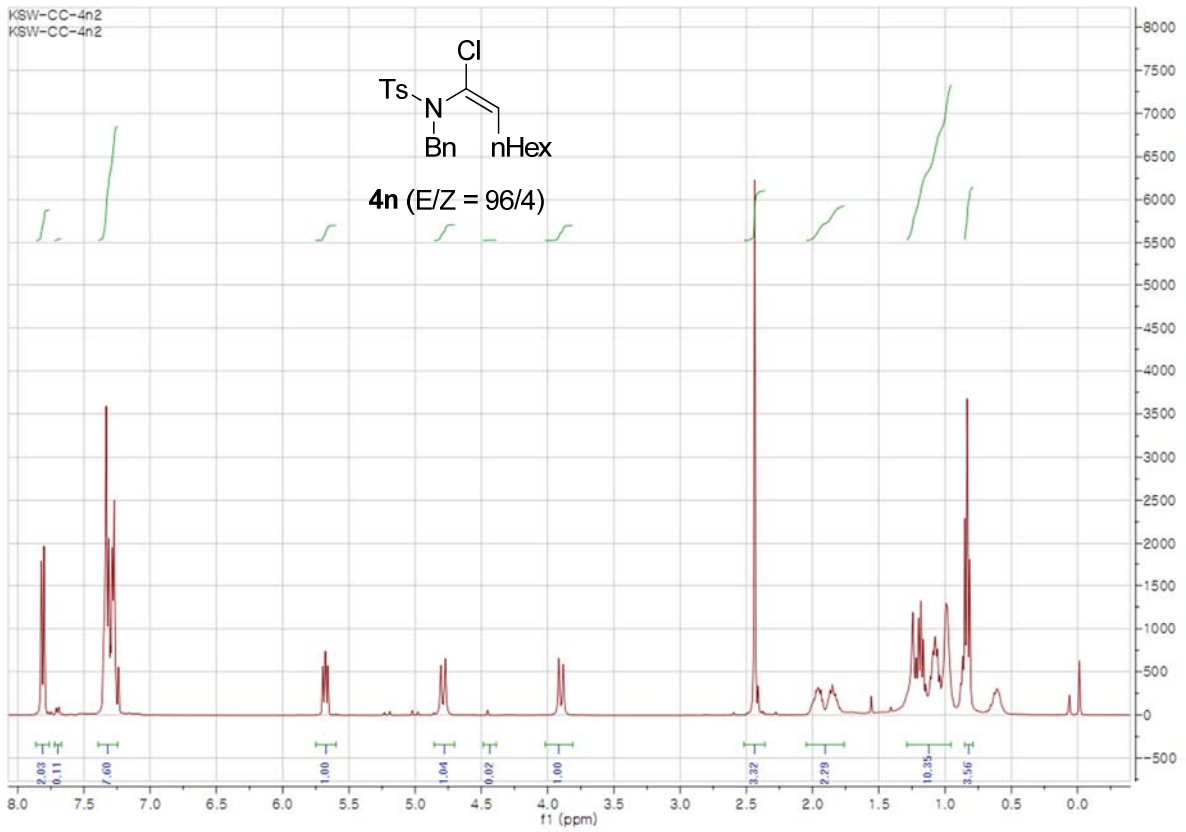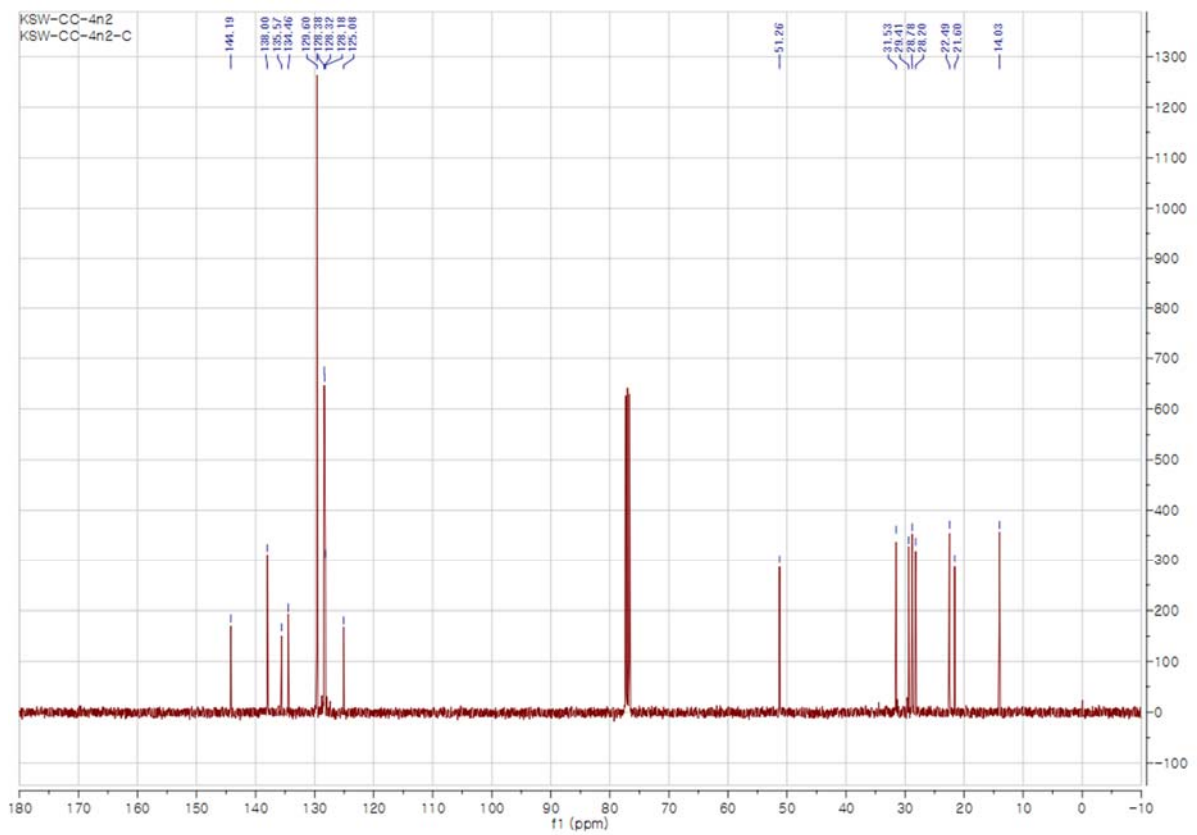

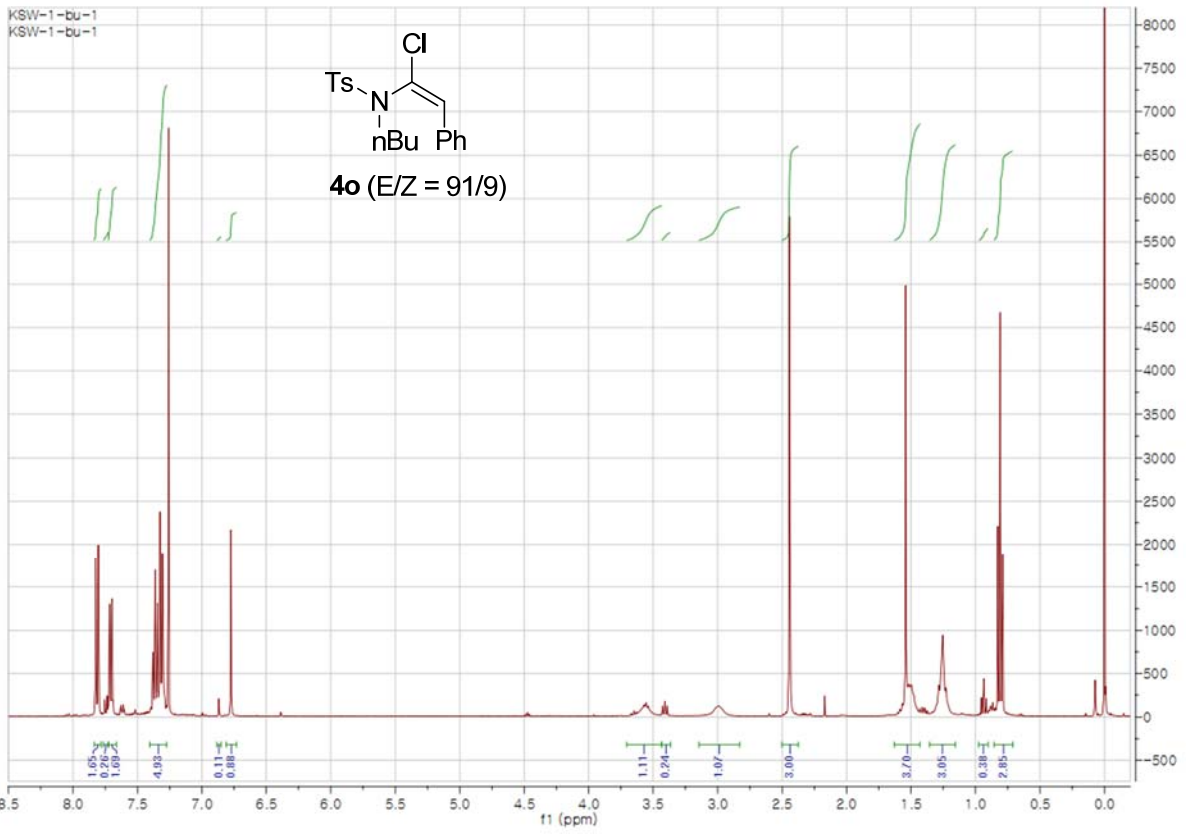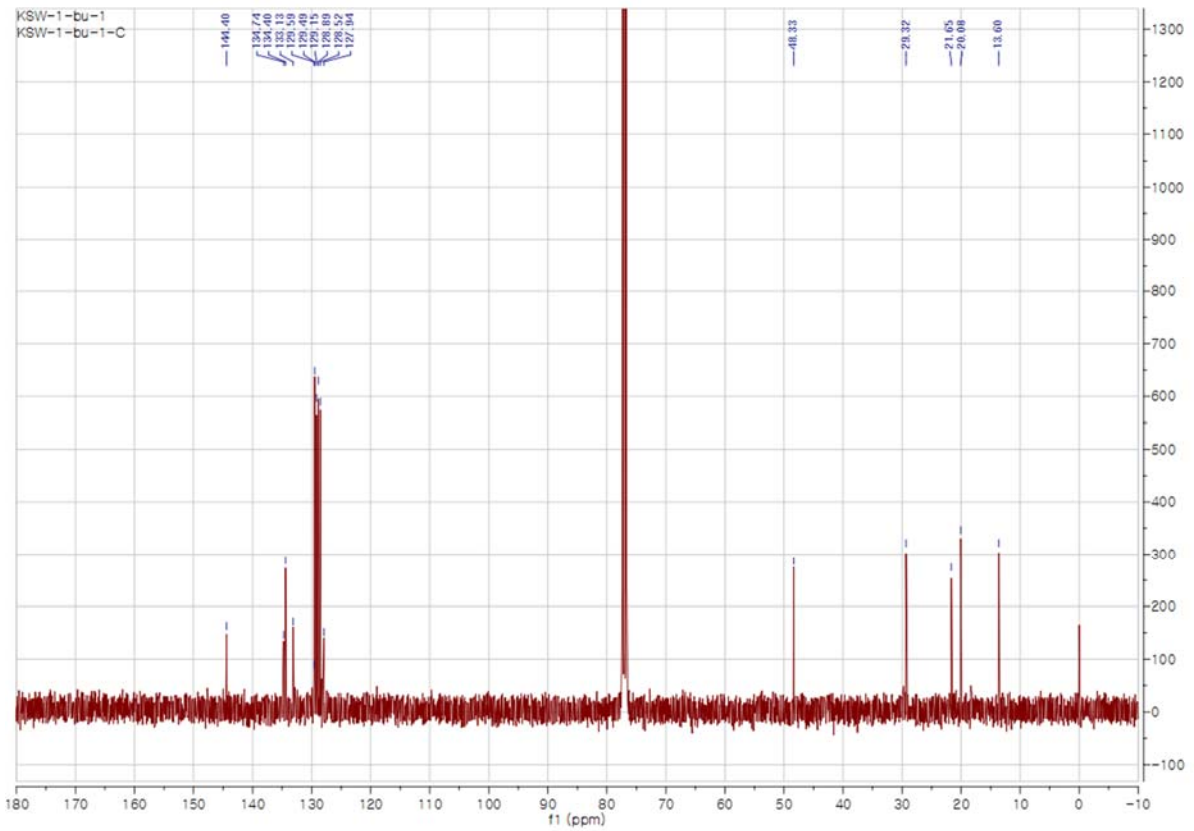

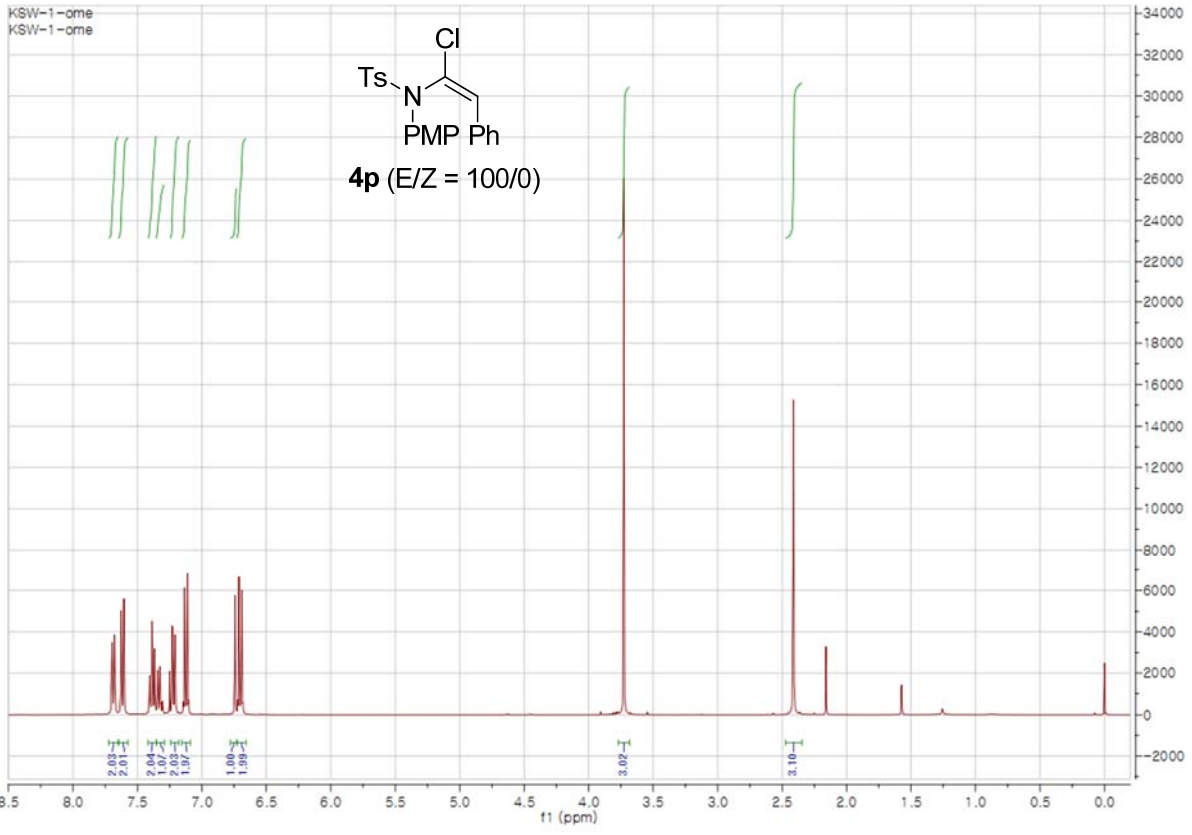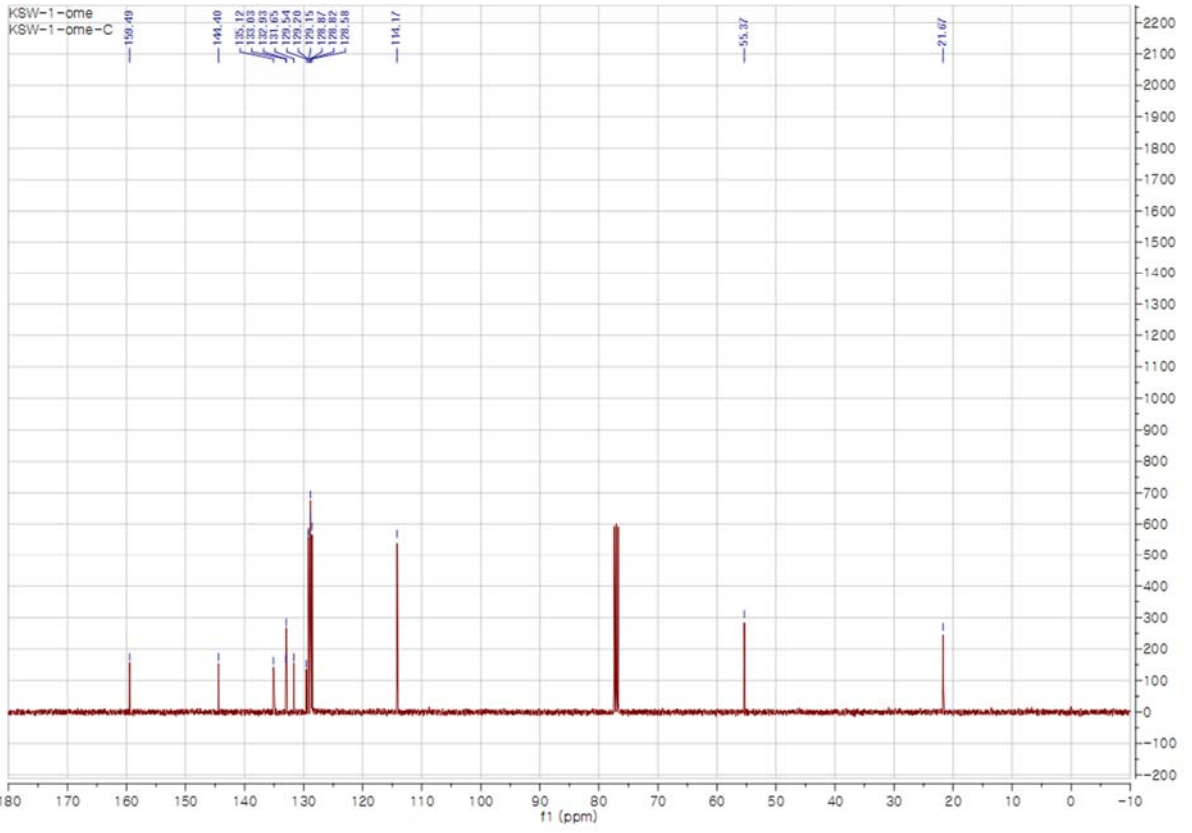

KSW-1-21-P  
KSW-1-21-P

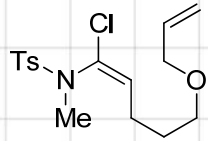

4q (E/Z = 82/18)

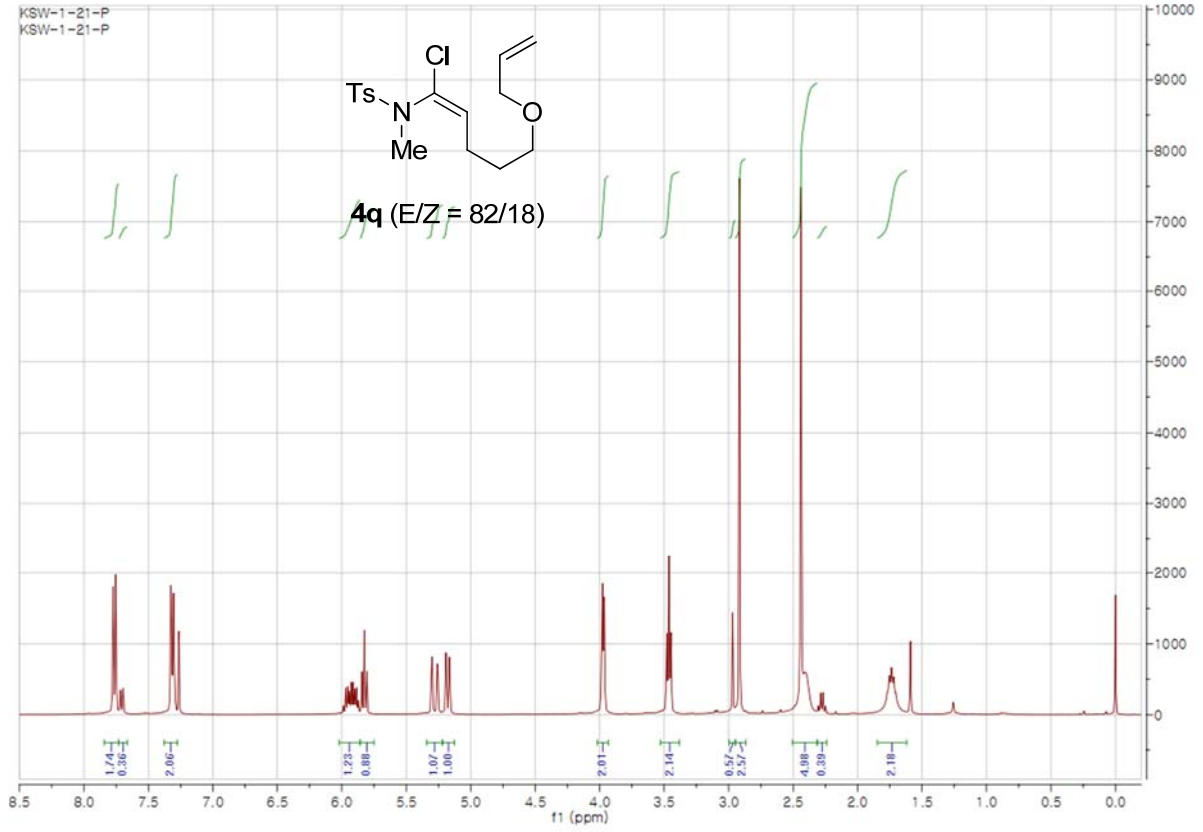

KSW-1-21-P  
KSW-1-21-P-C

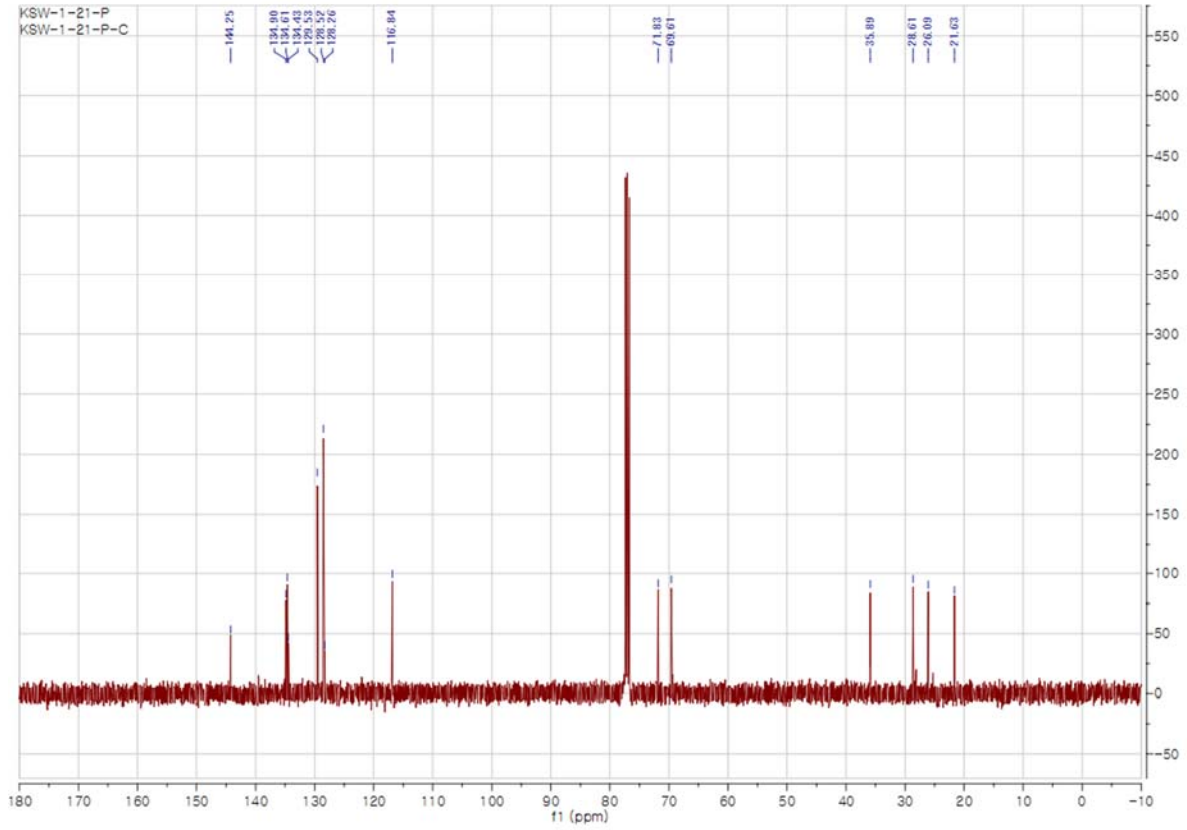

KSW-1-8-P  
KSW-1-8-P

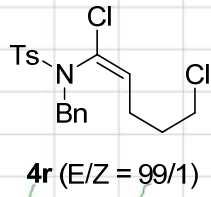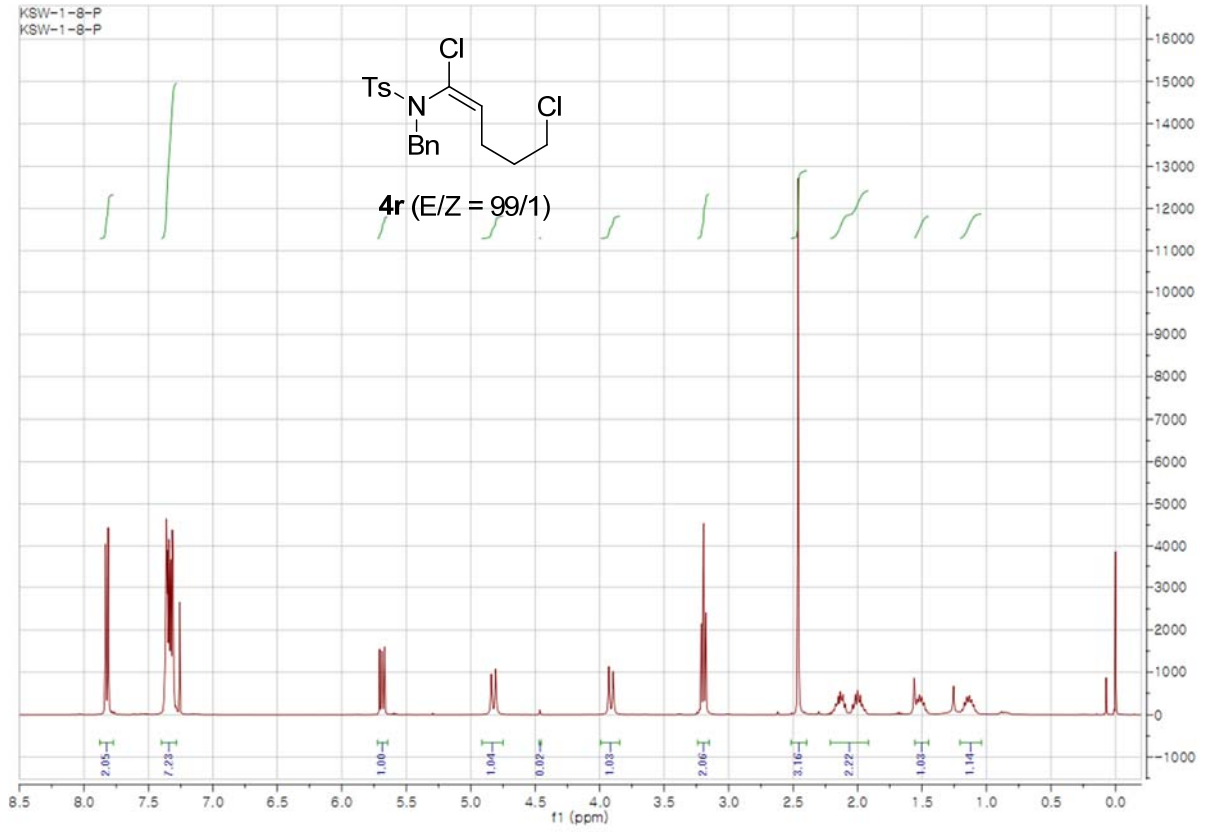

KSW-1-8-P  
KSW-1-8-P-C

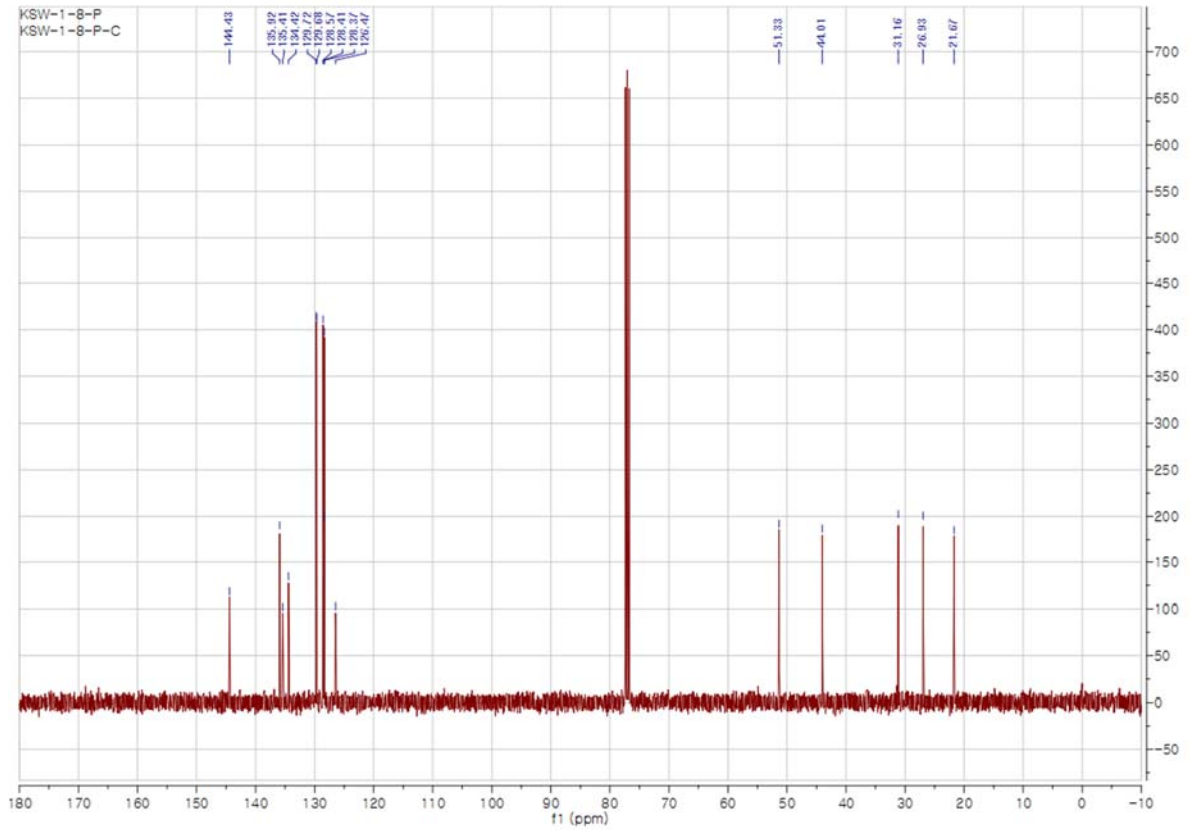

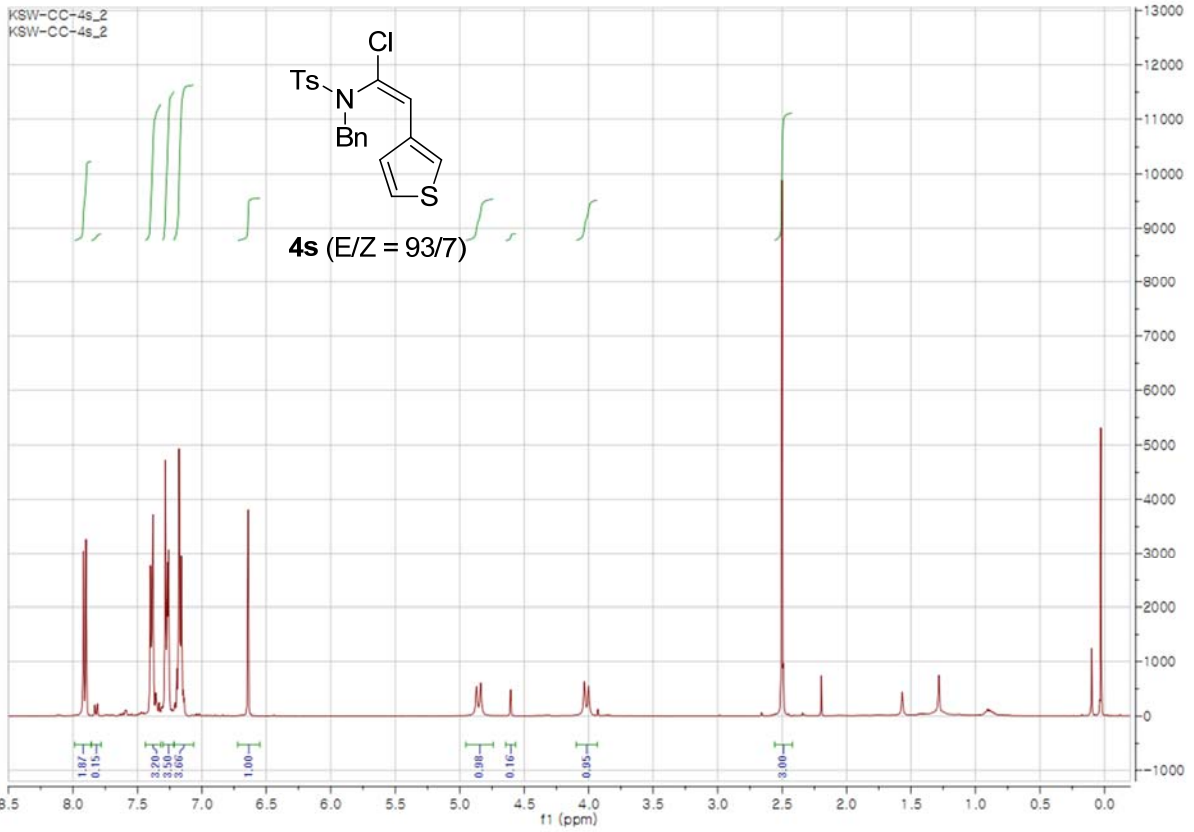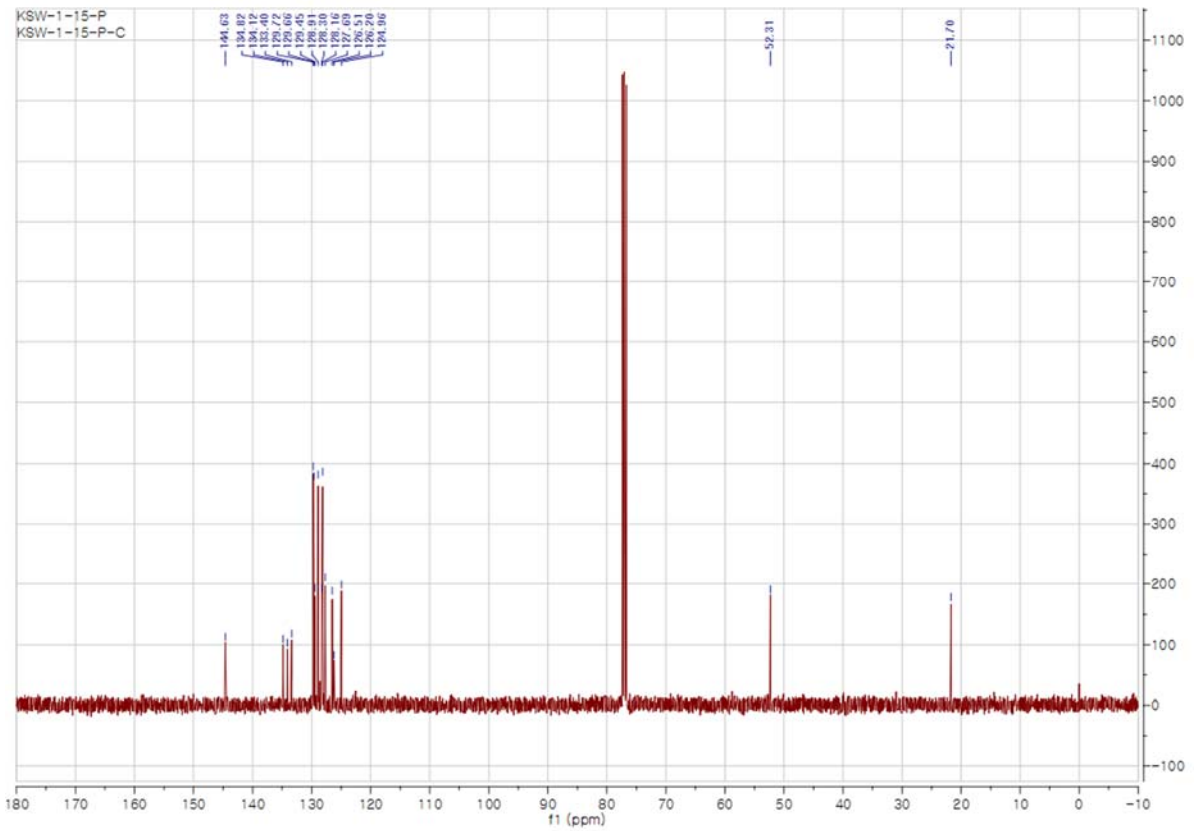

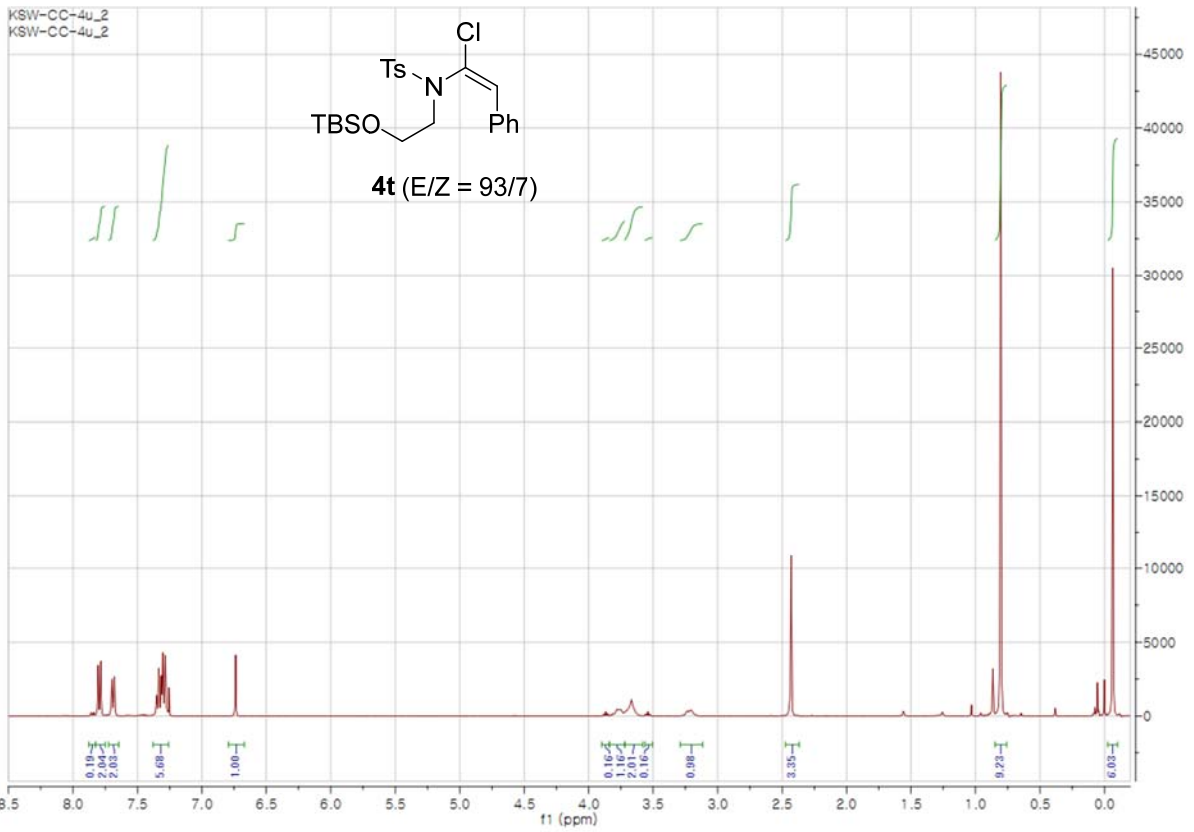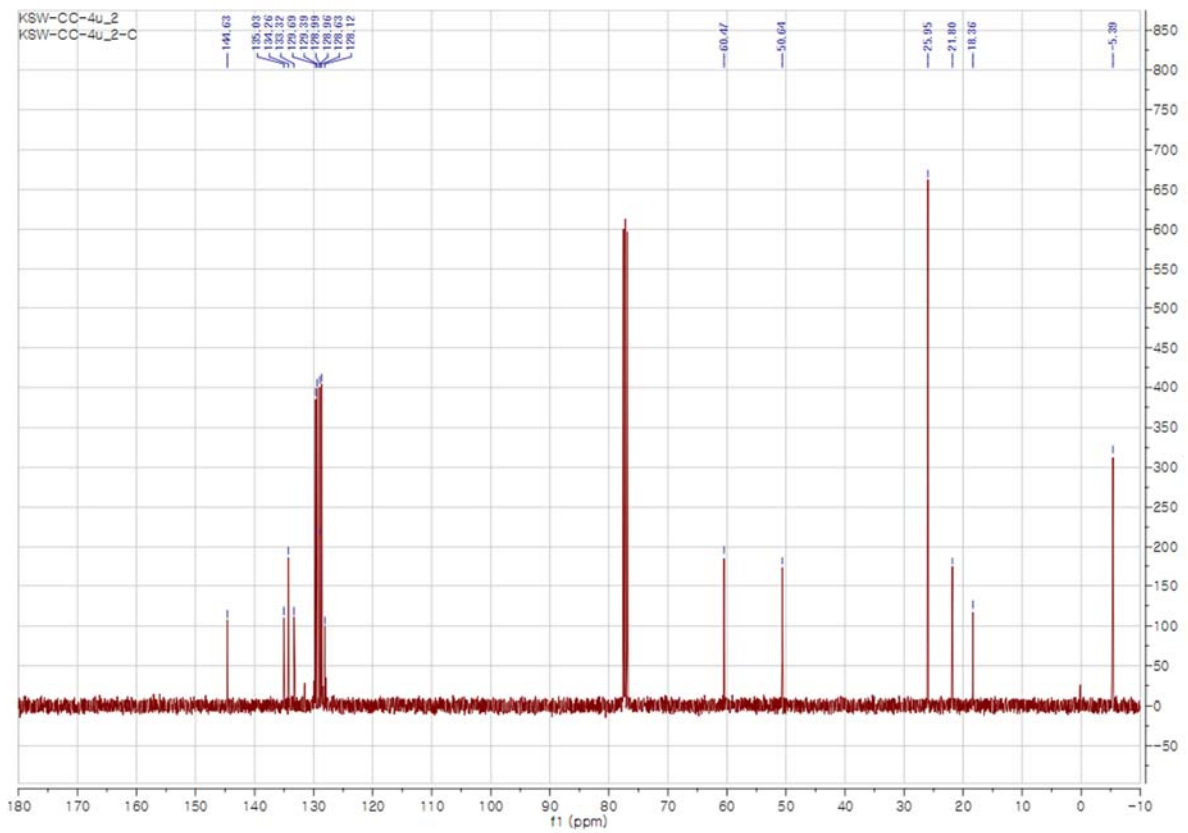



KSW-1-11-P  
KSW-1-11-P

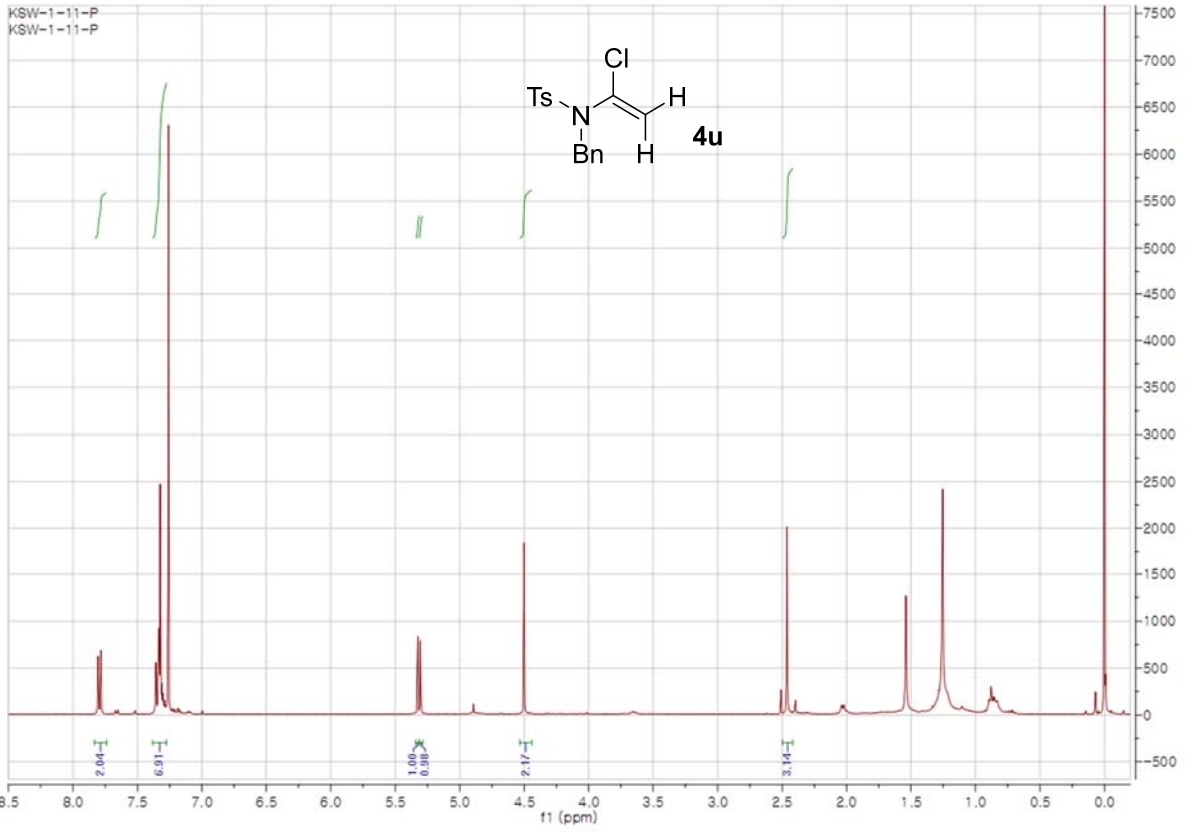

KSW-1-11-P-C  
KSW-1-11-P-C

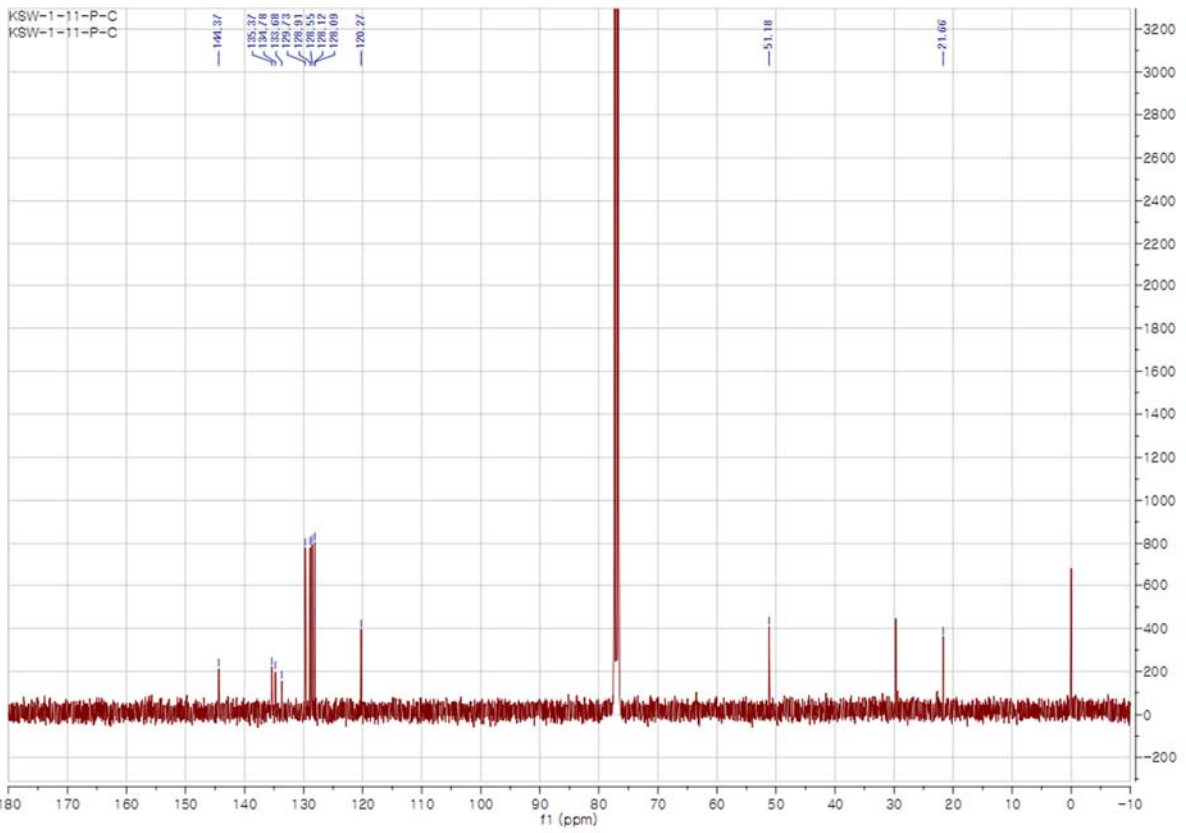

KSW-1-Br-1  
KSW-1-Br-1

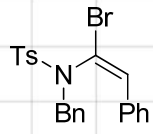

7a (E/Z = 84/16)

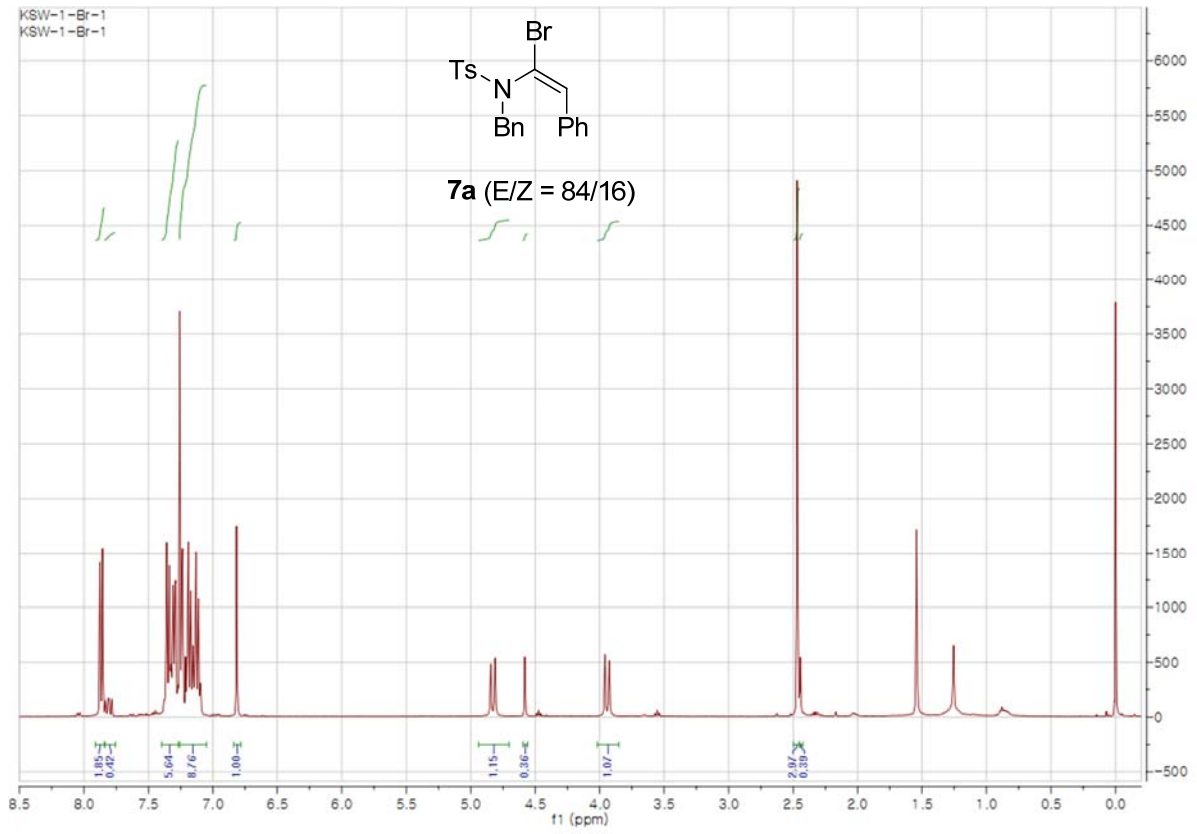

KSW-1-Br-1  
KSW-1-Br-1-C

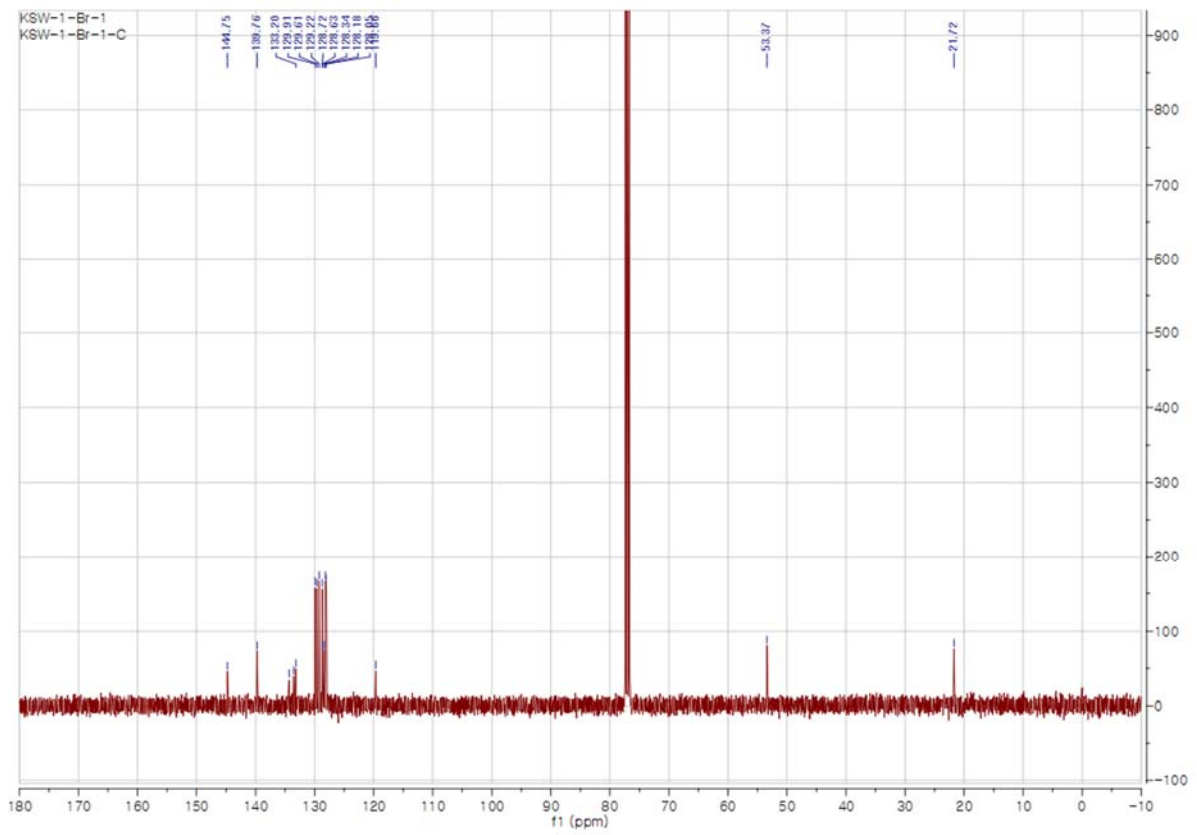

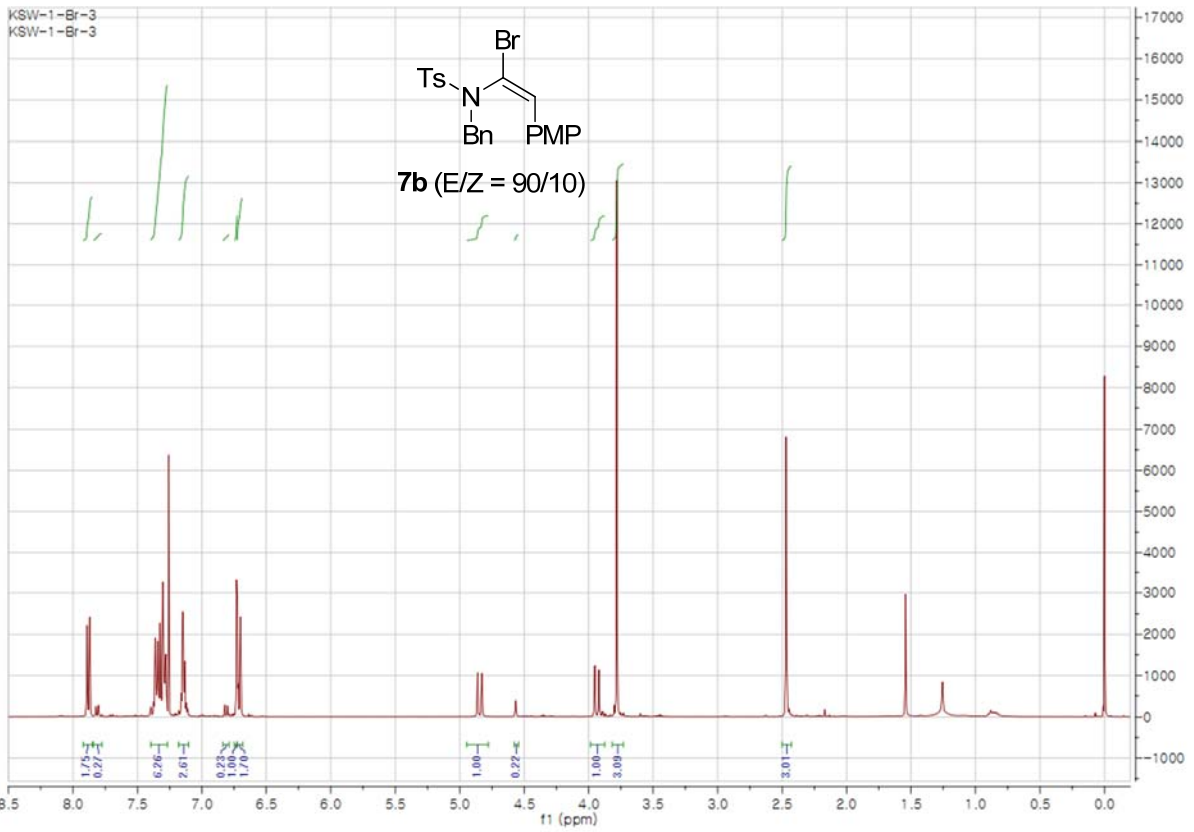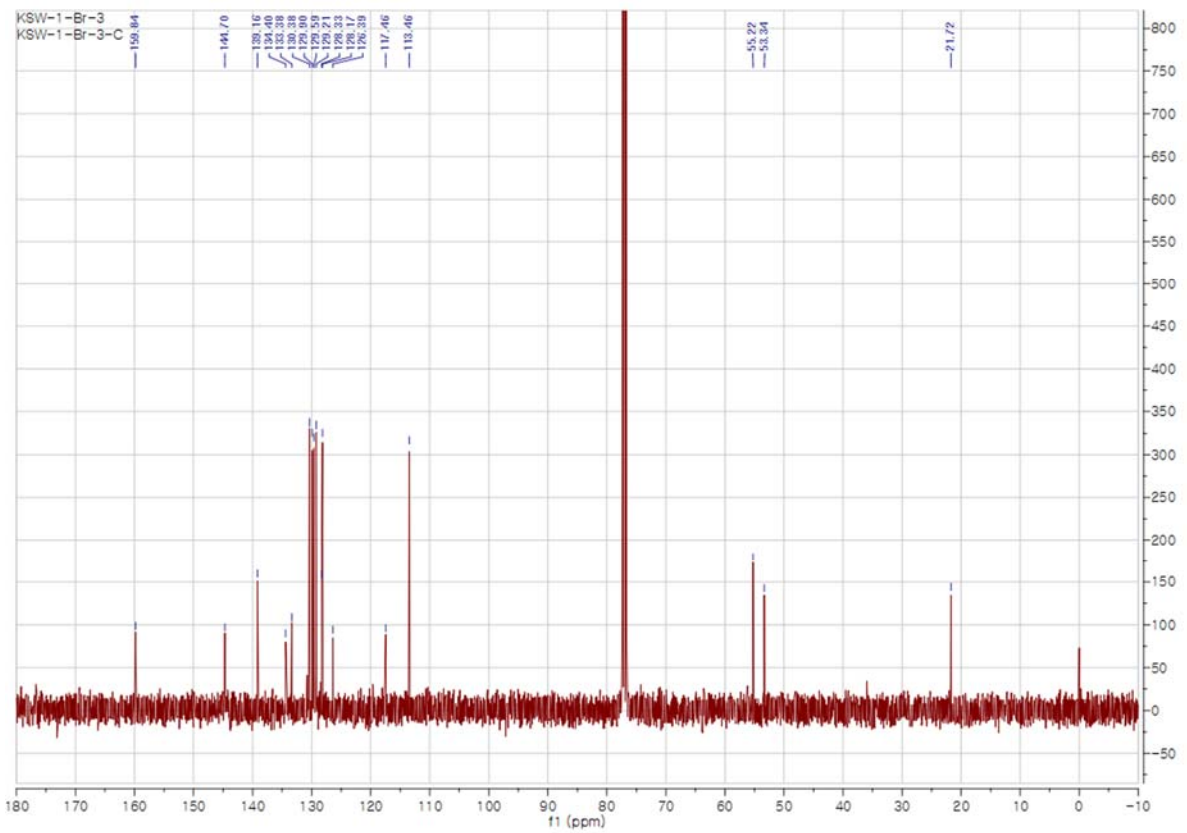

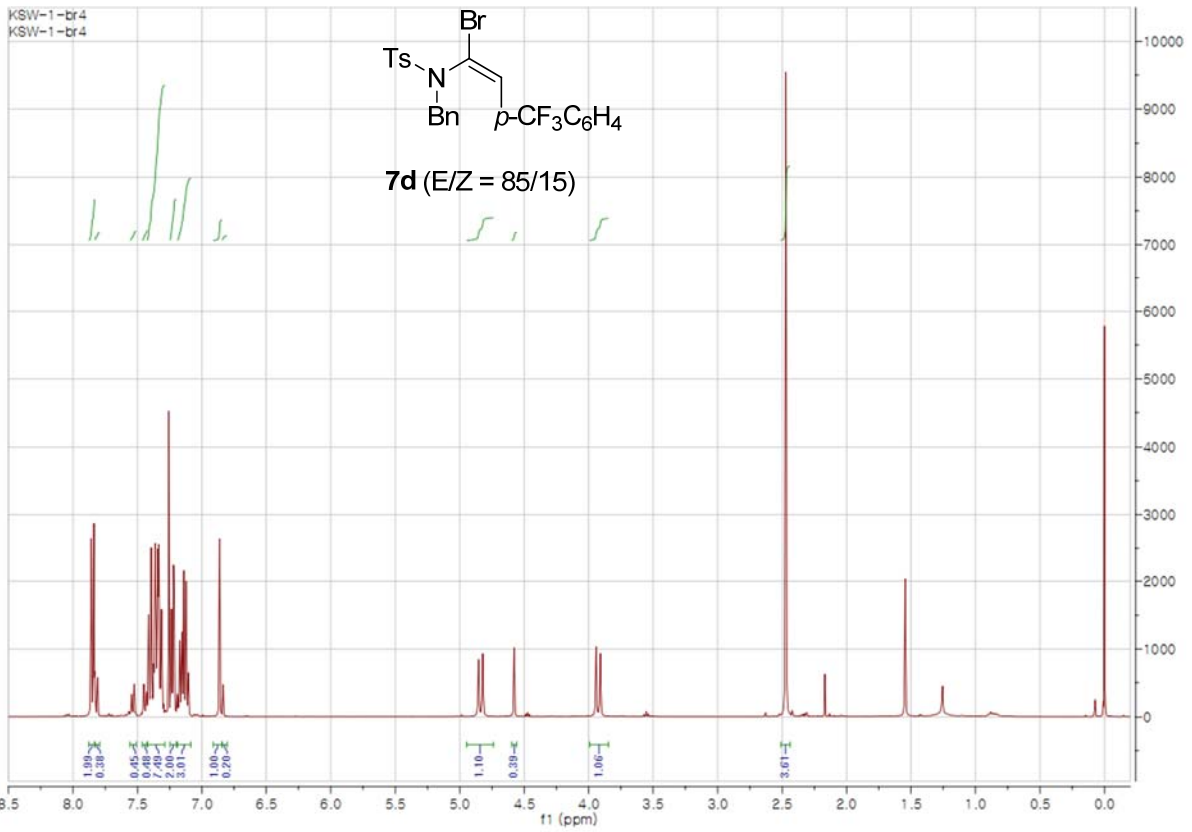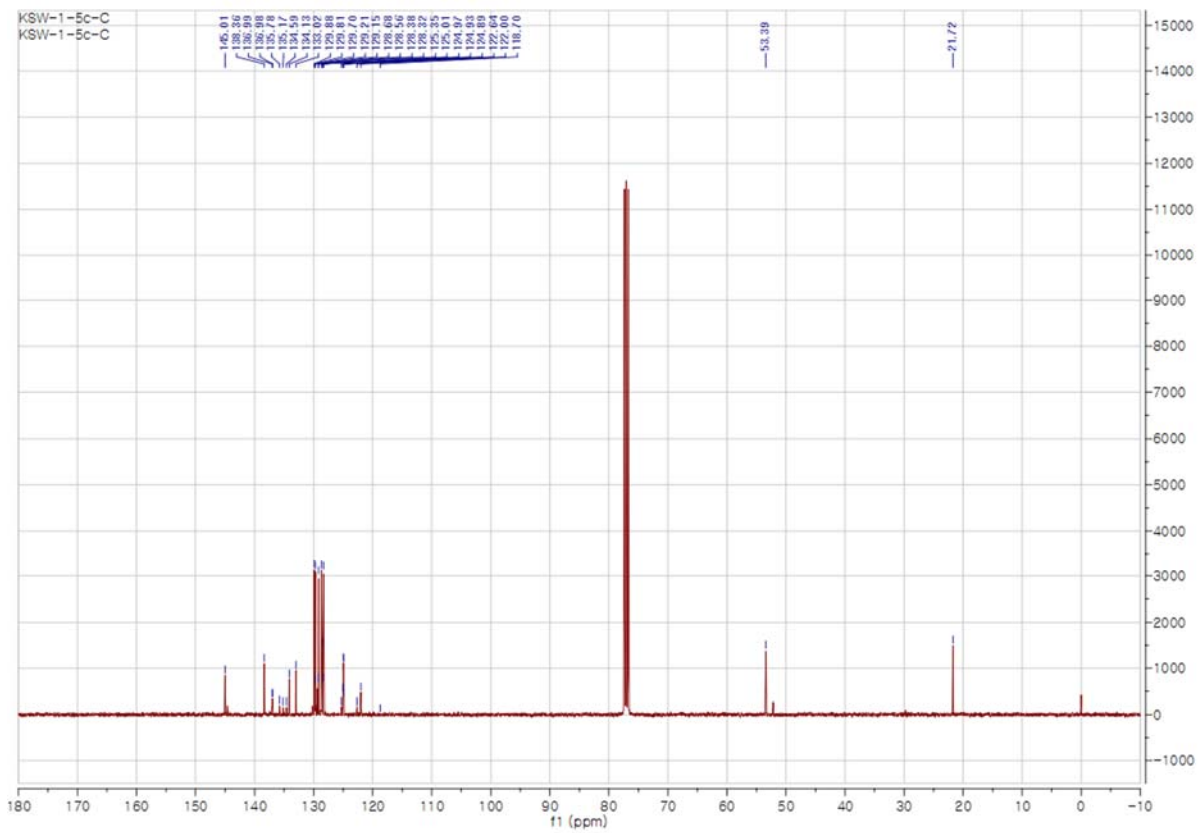

KSW-1-br5  
KSW-1-br5

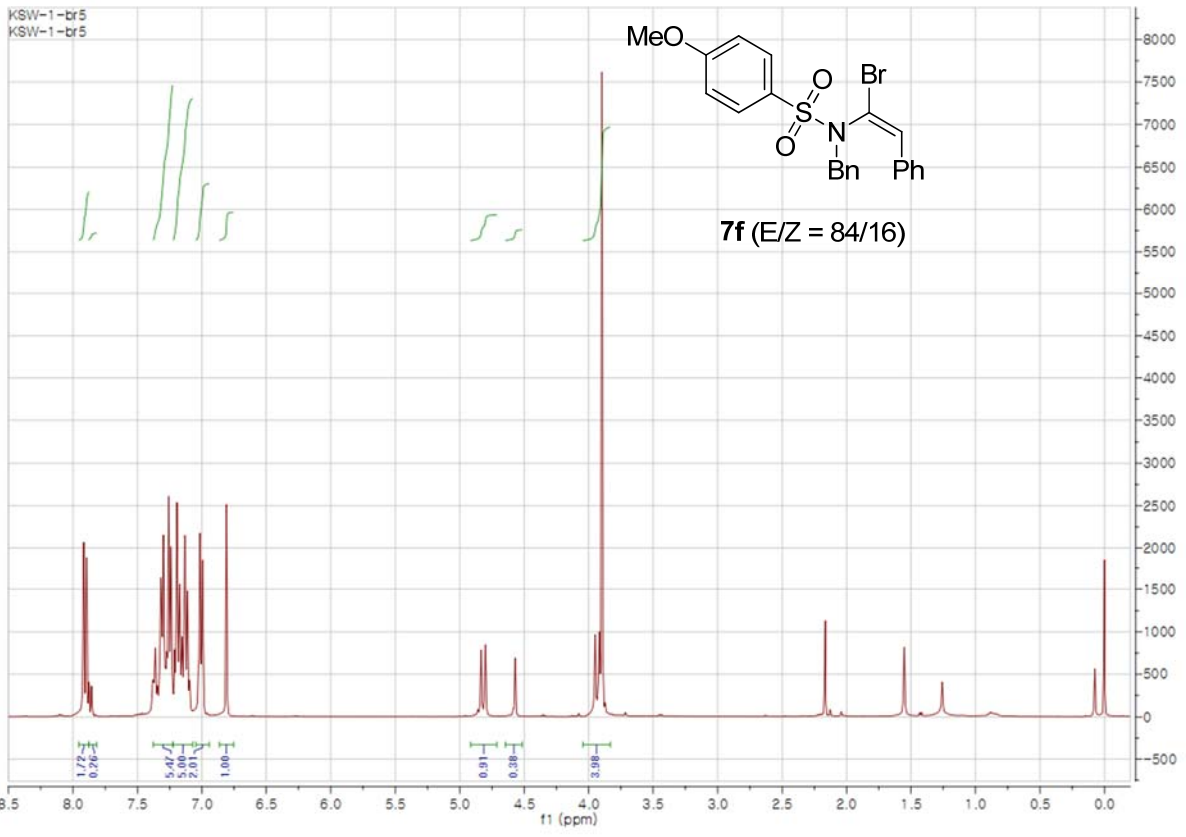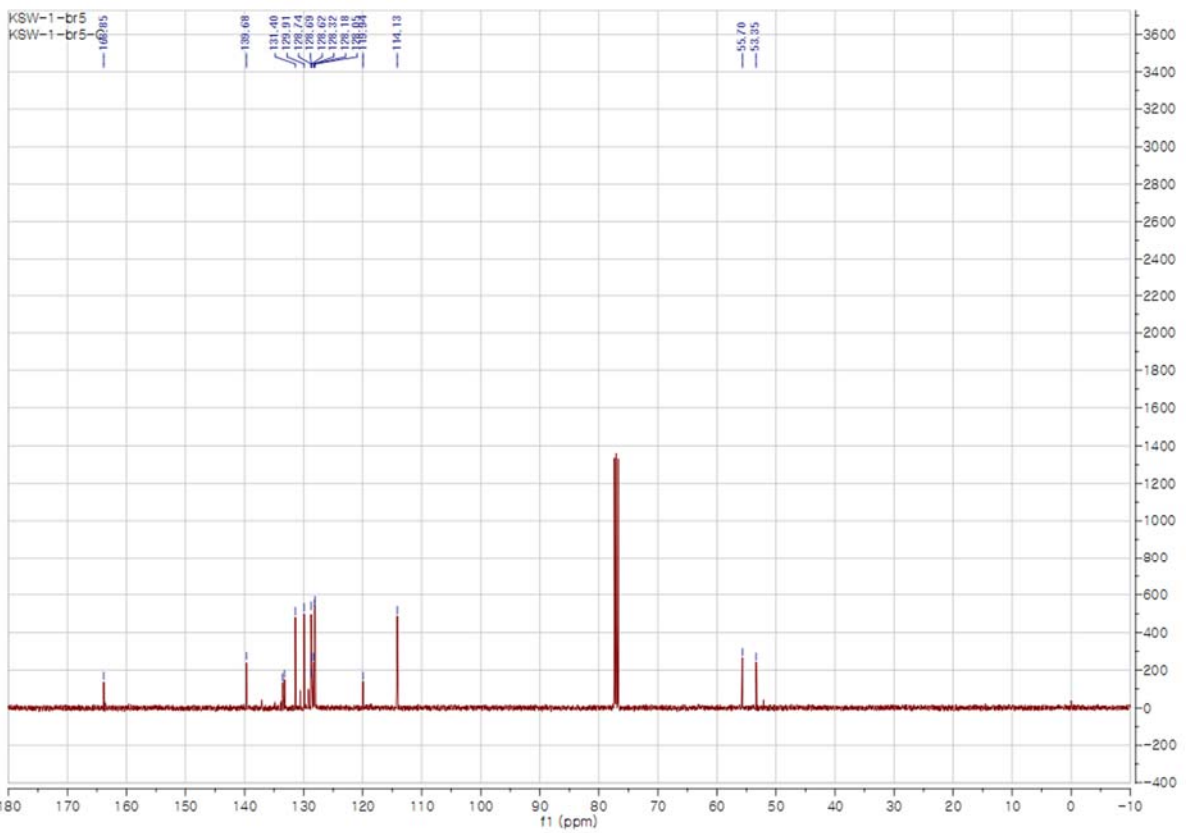

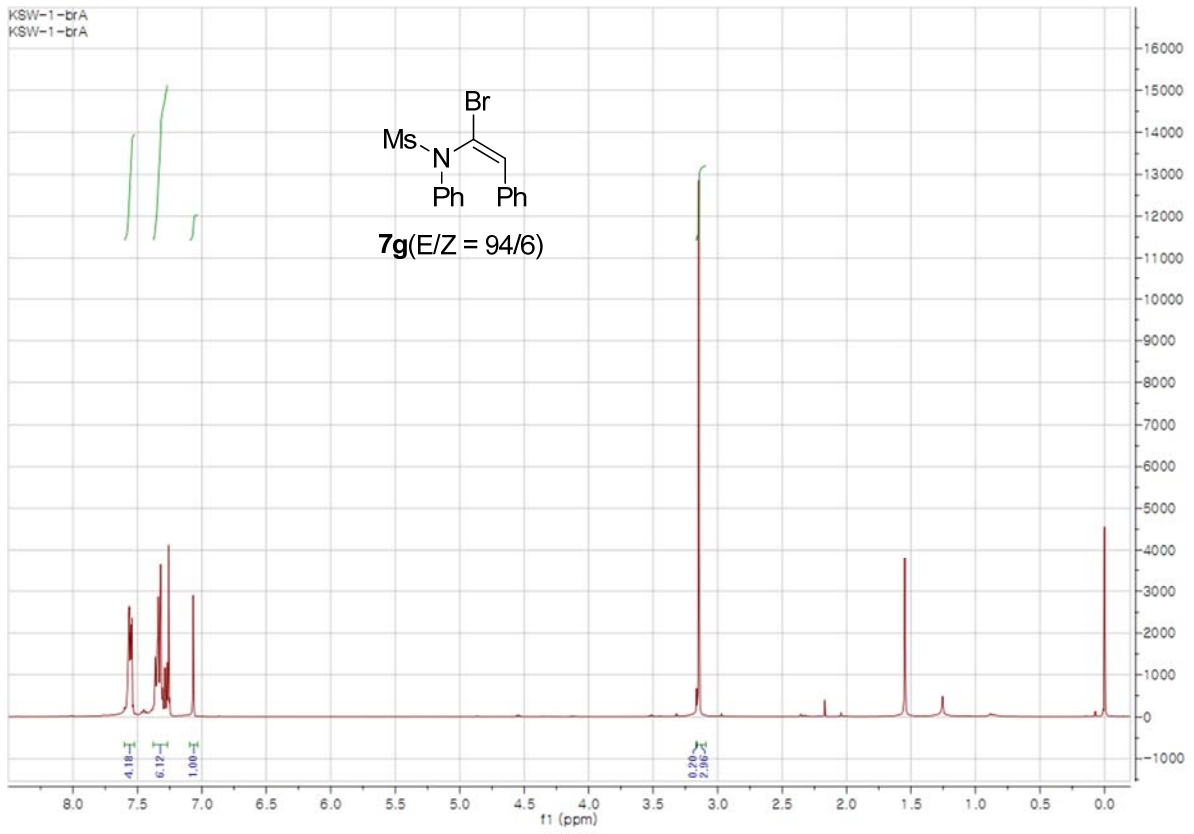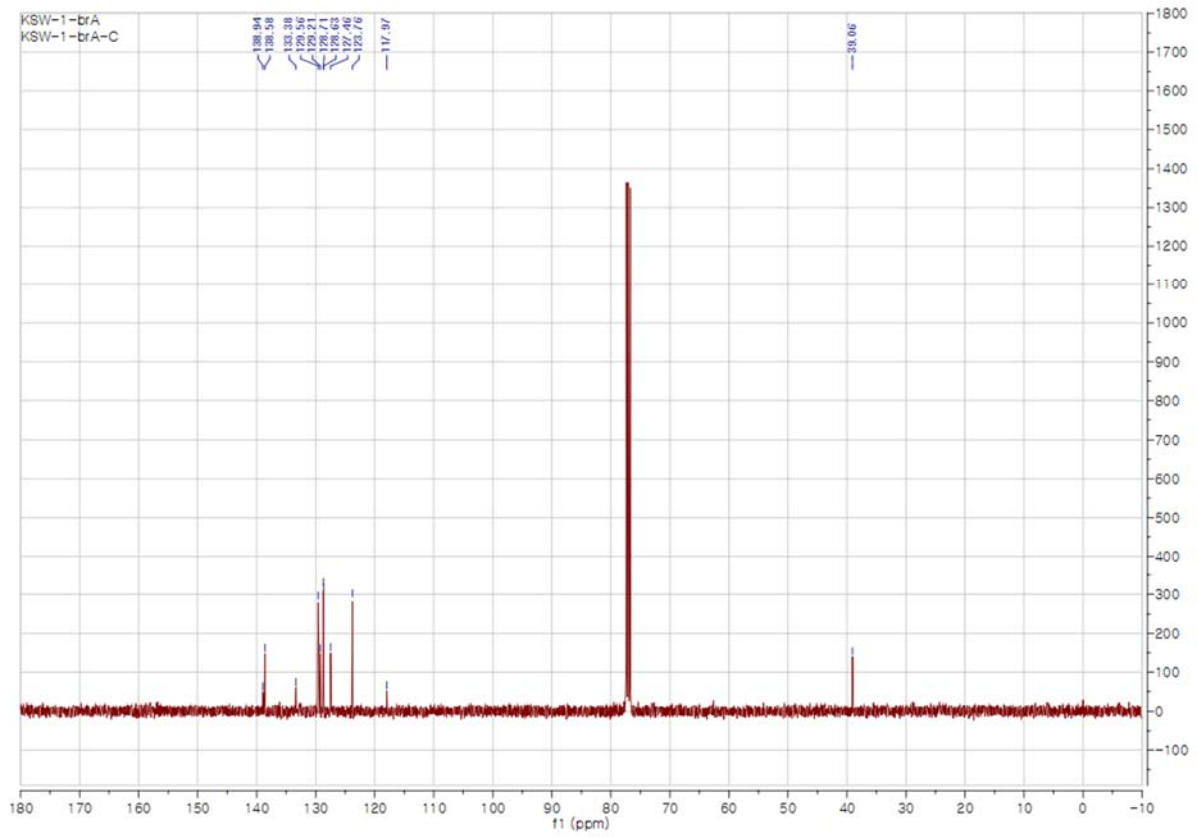

KSW-1-brB  
KSW-1-brB

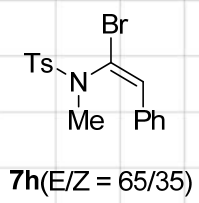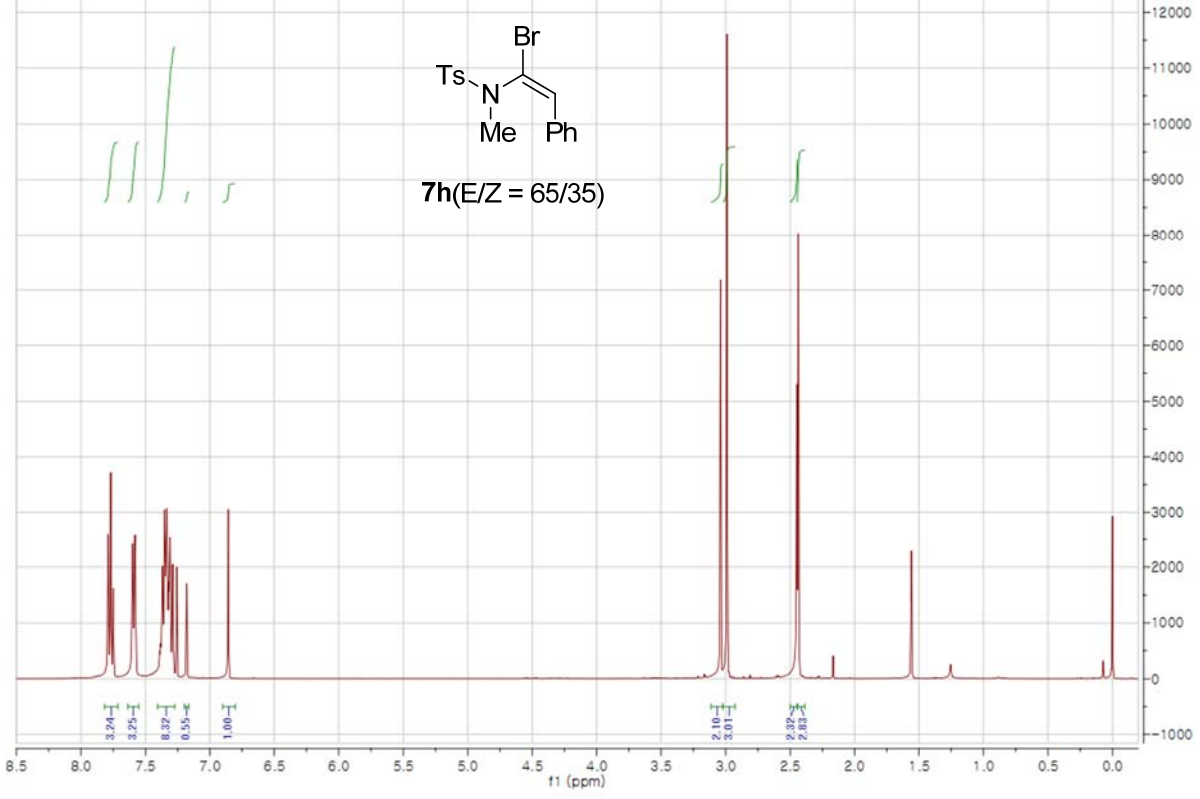

KSW-1-brB  
KSW-1-brB-C

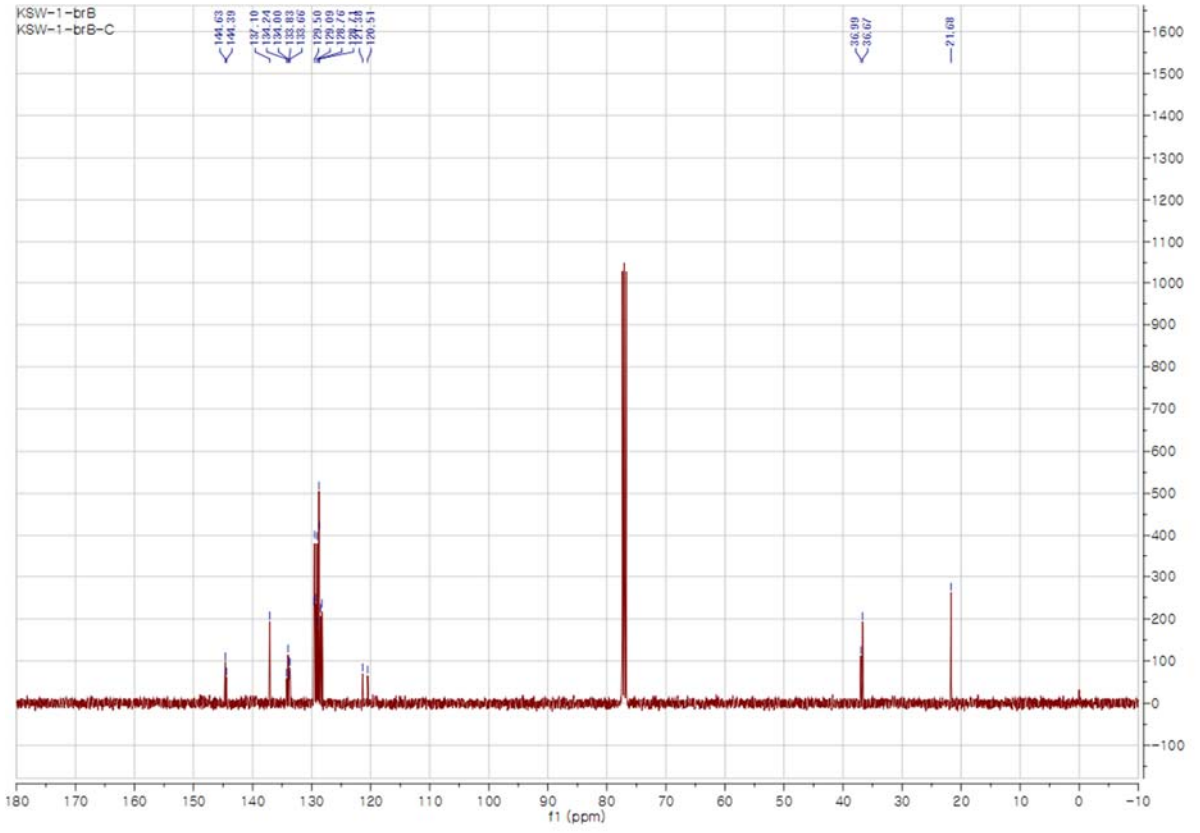

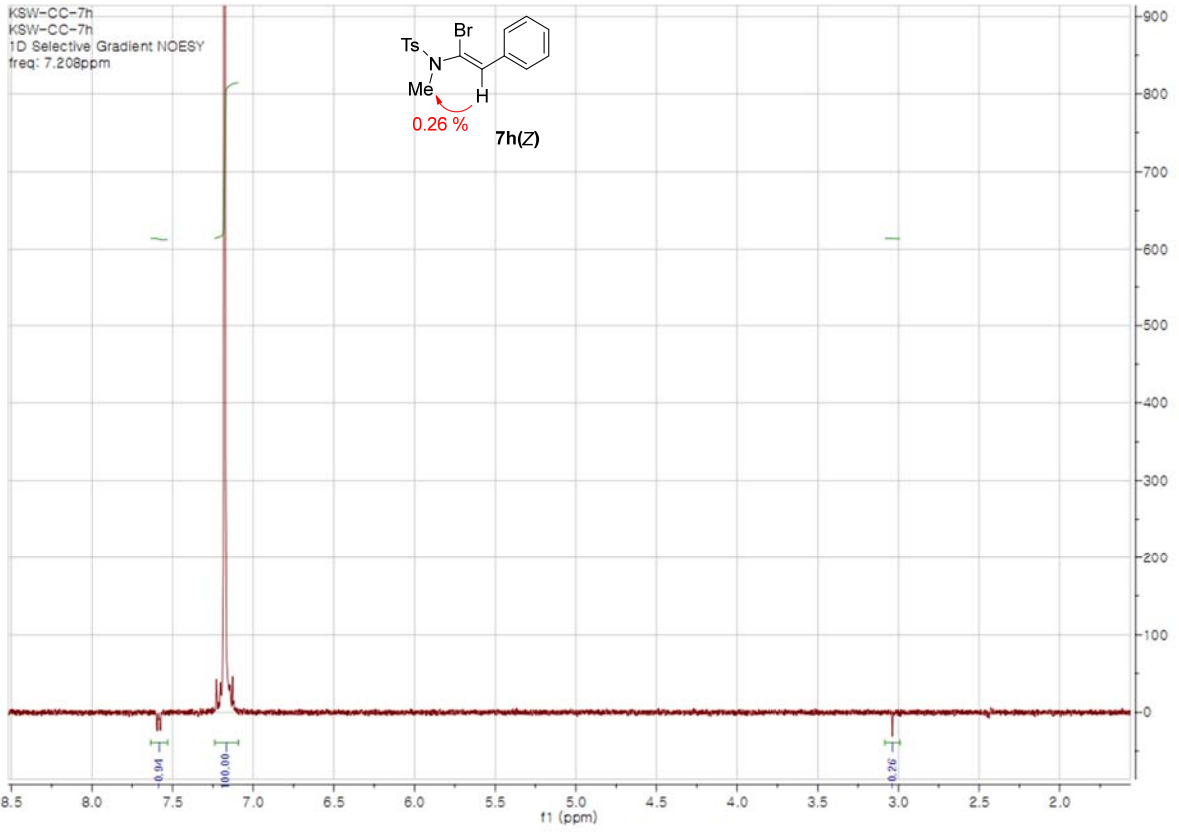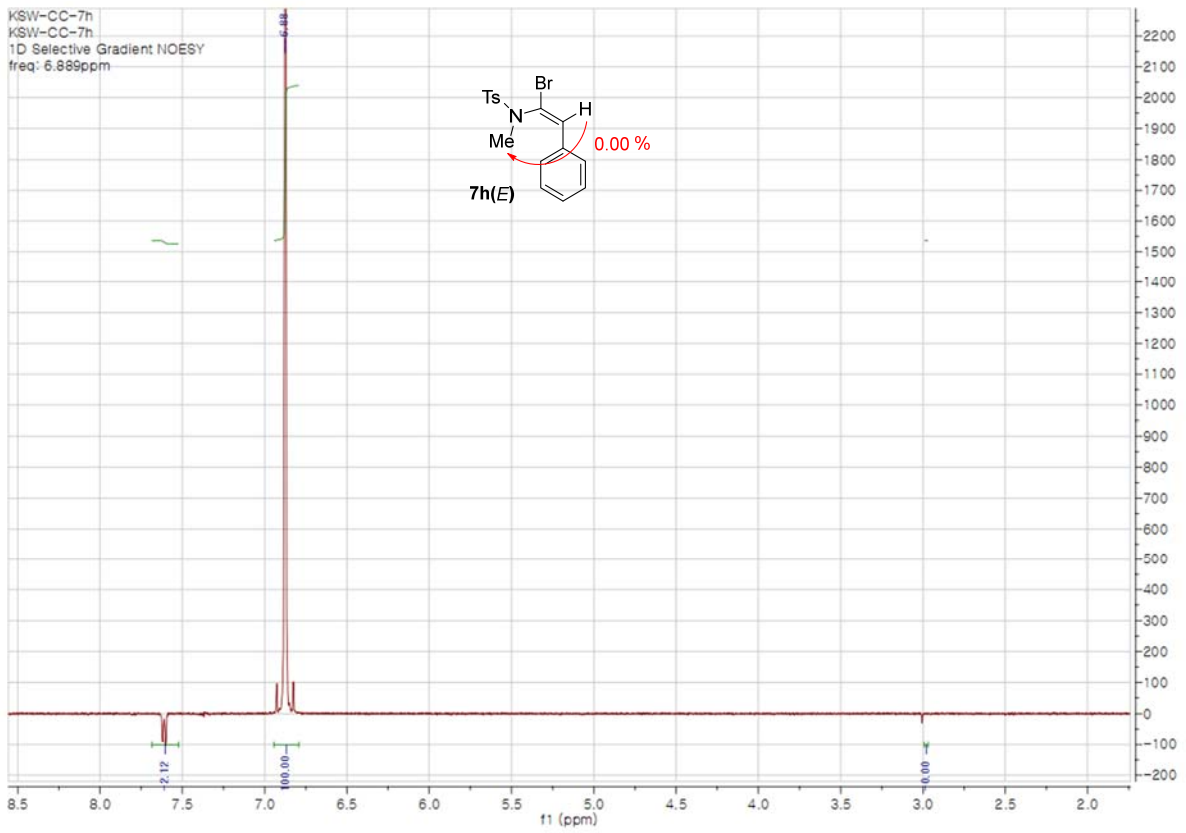



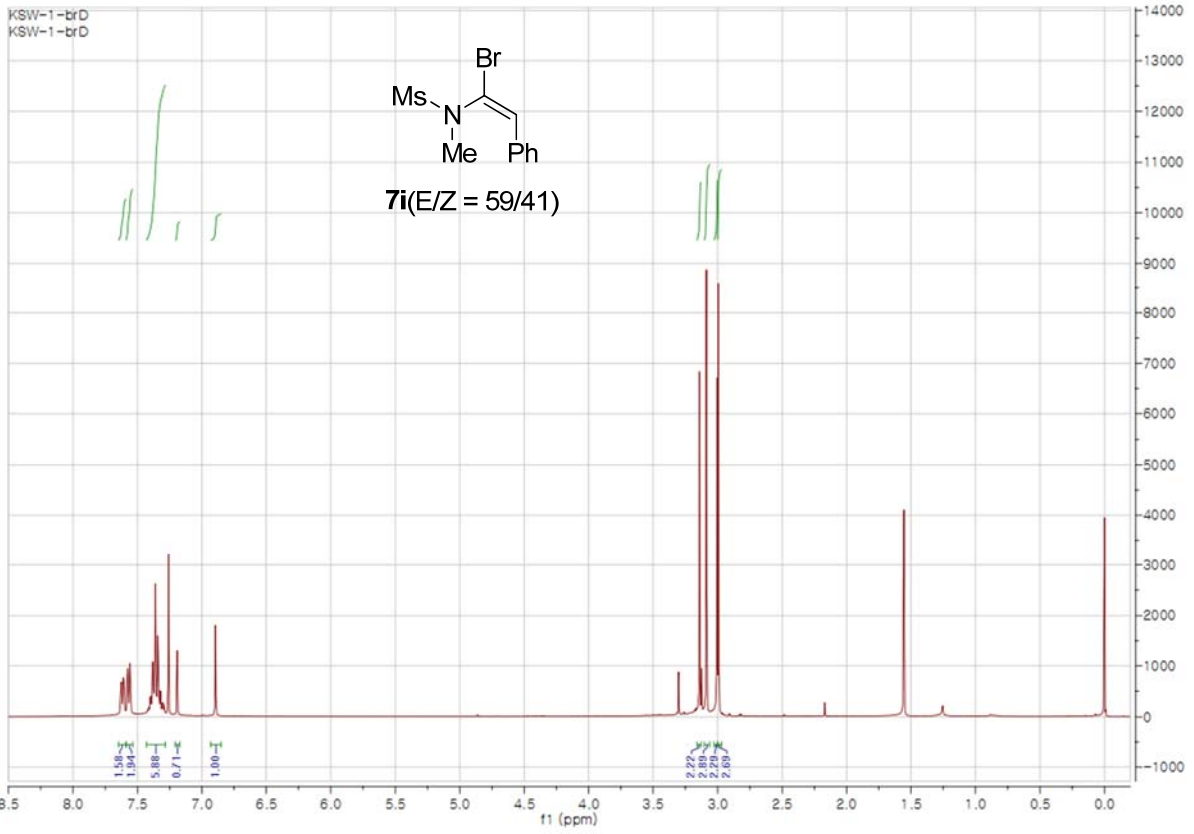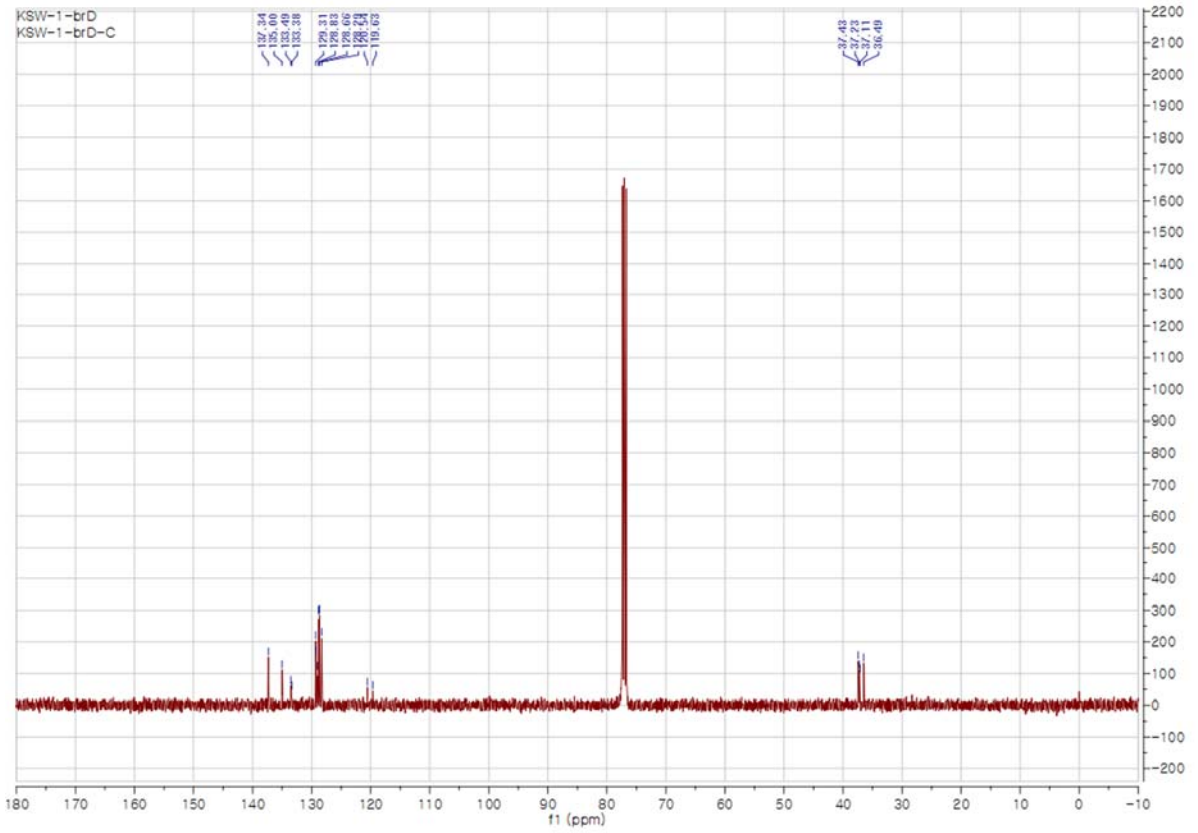

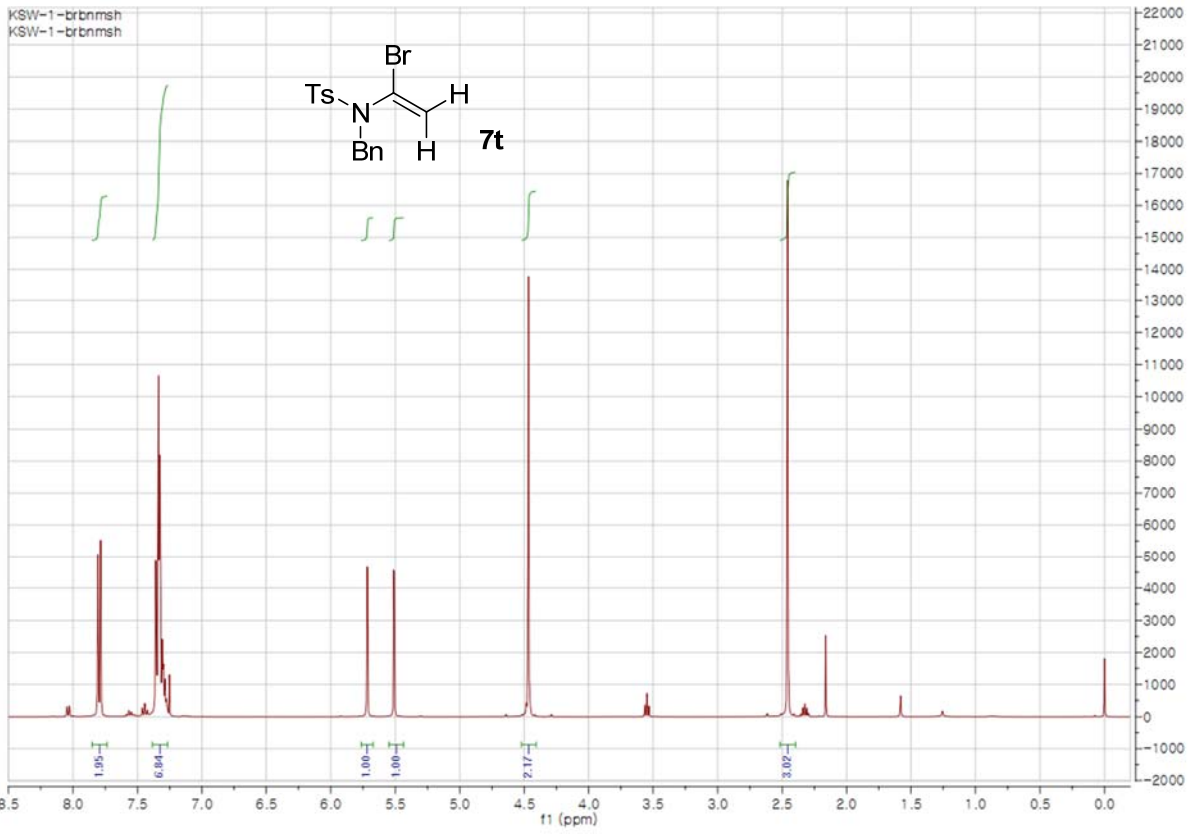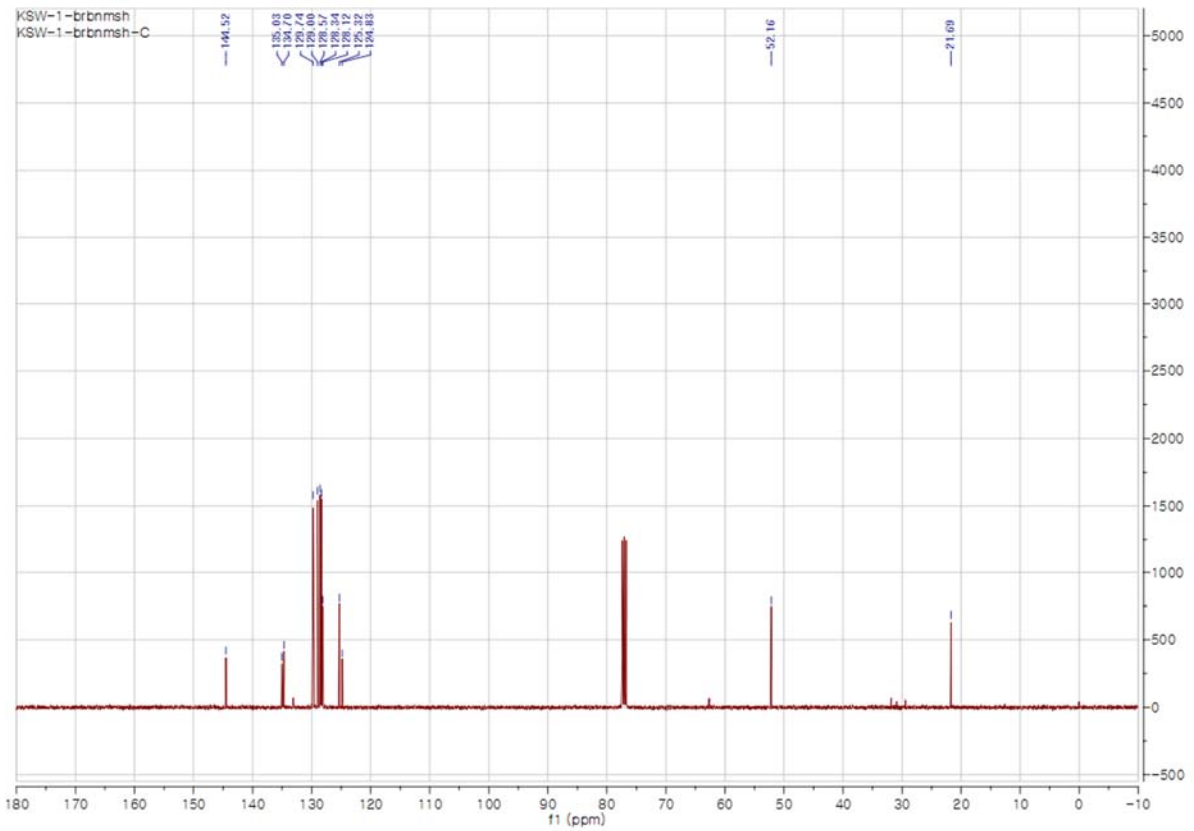

KSW-1-2-D  
KSW-1-2-D

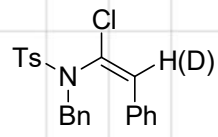

**d-4a** d-30 atom%

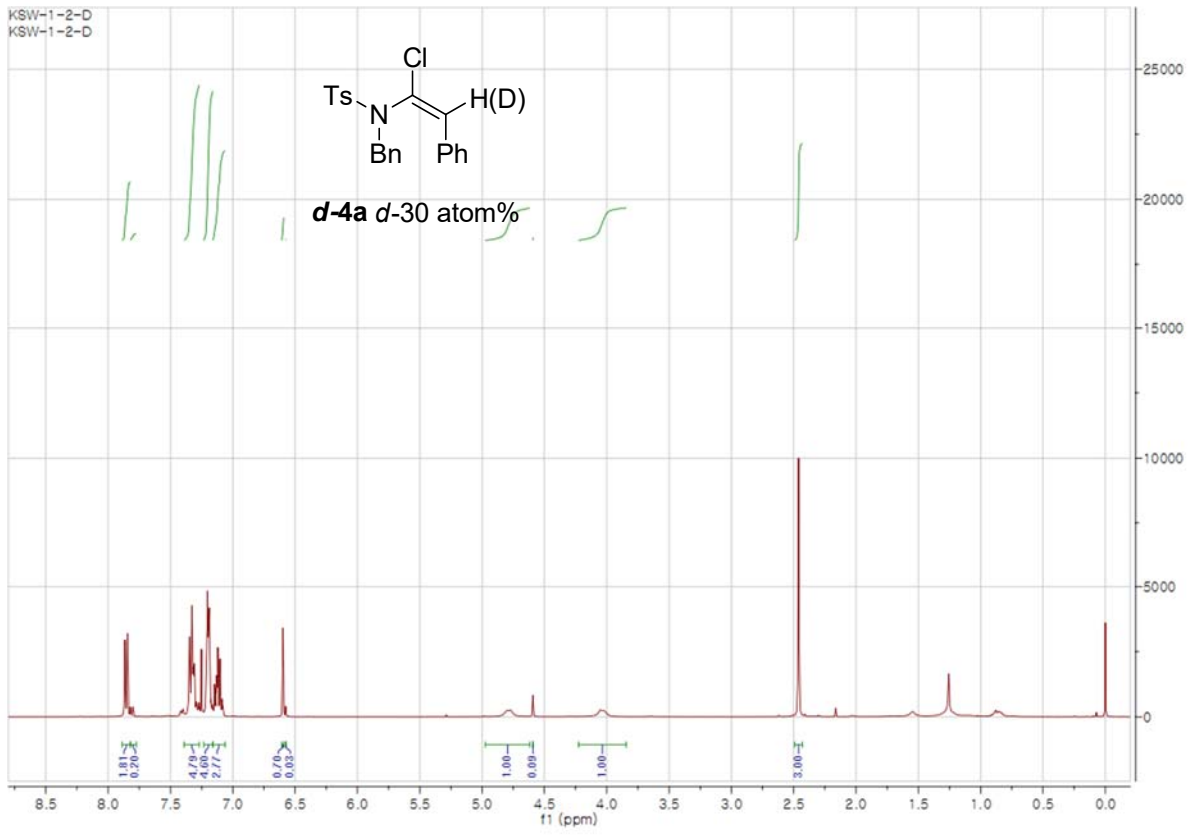

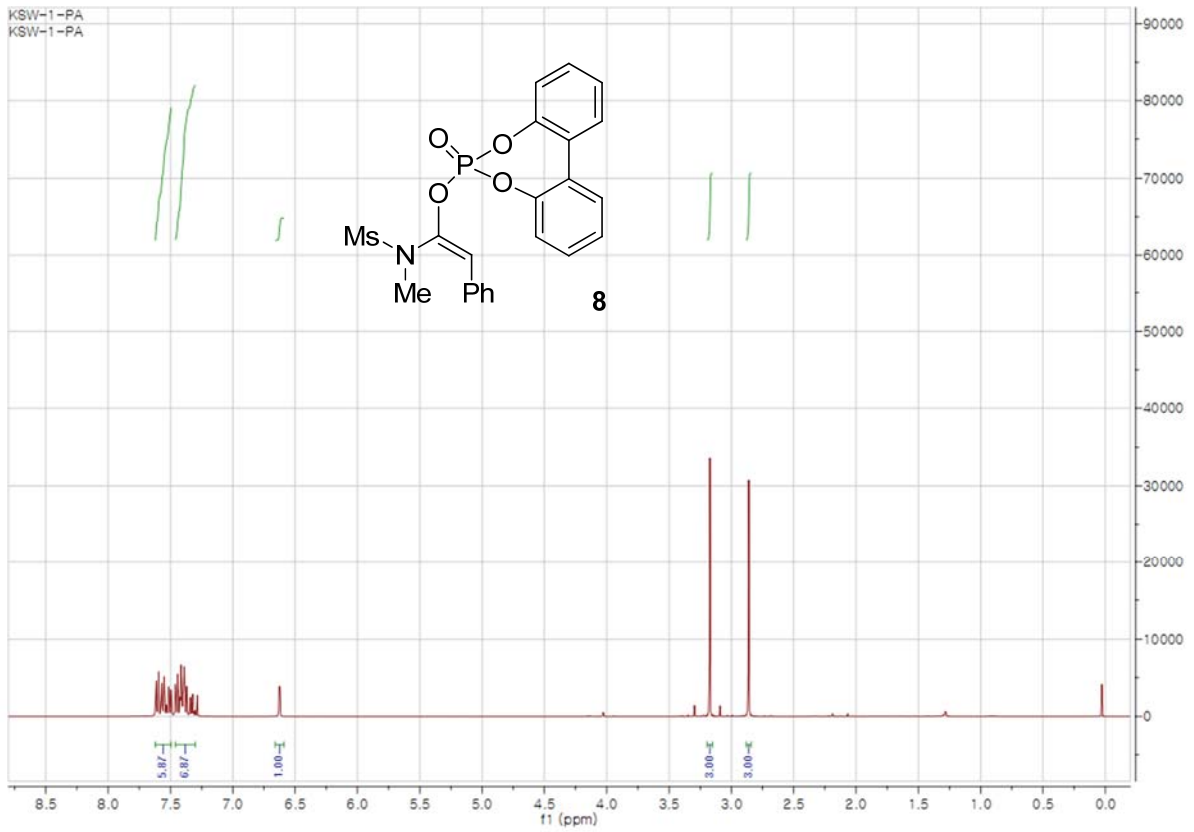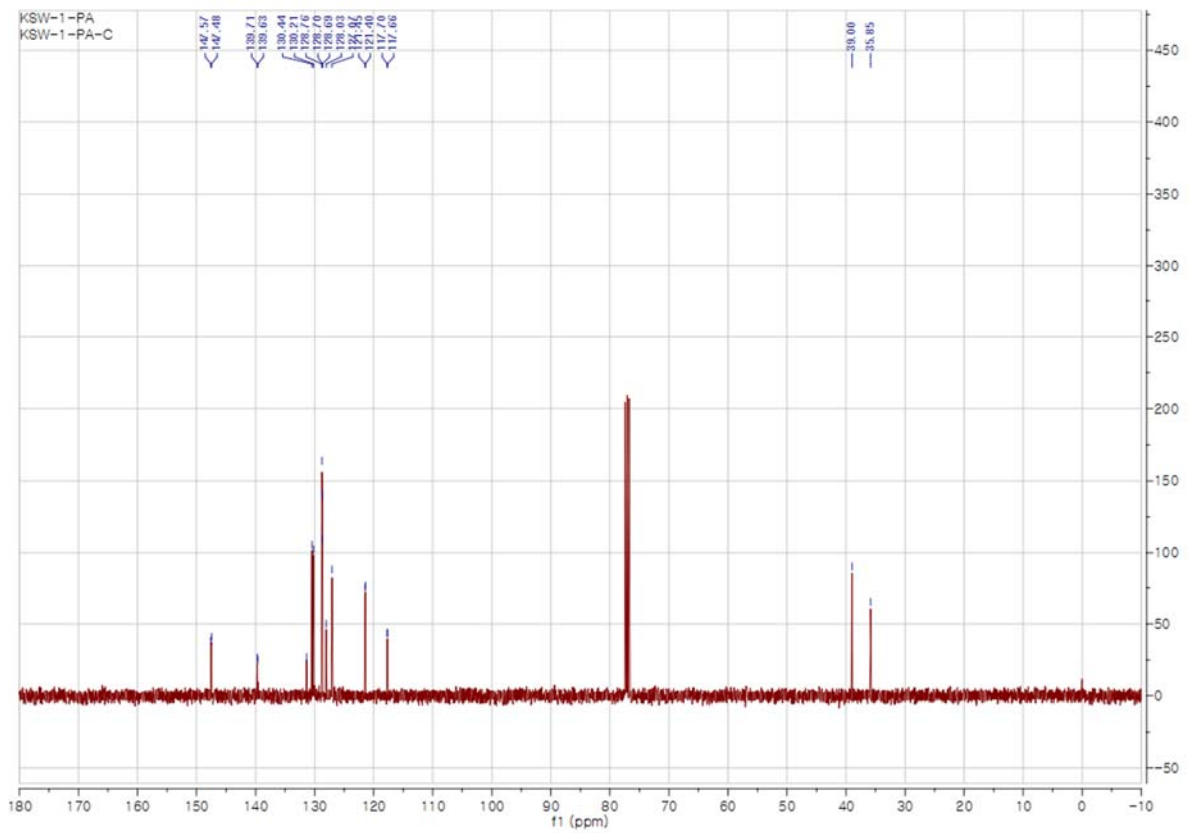

KSW-1-PAadduct  
KSW-1-PAadduct-P

— 5.00

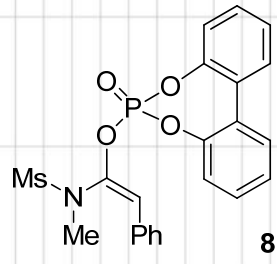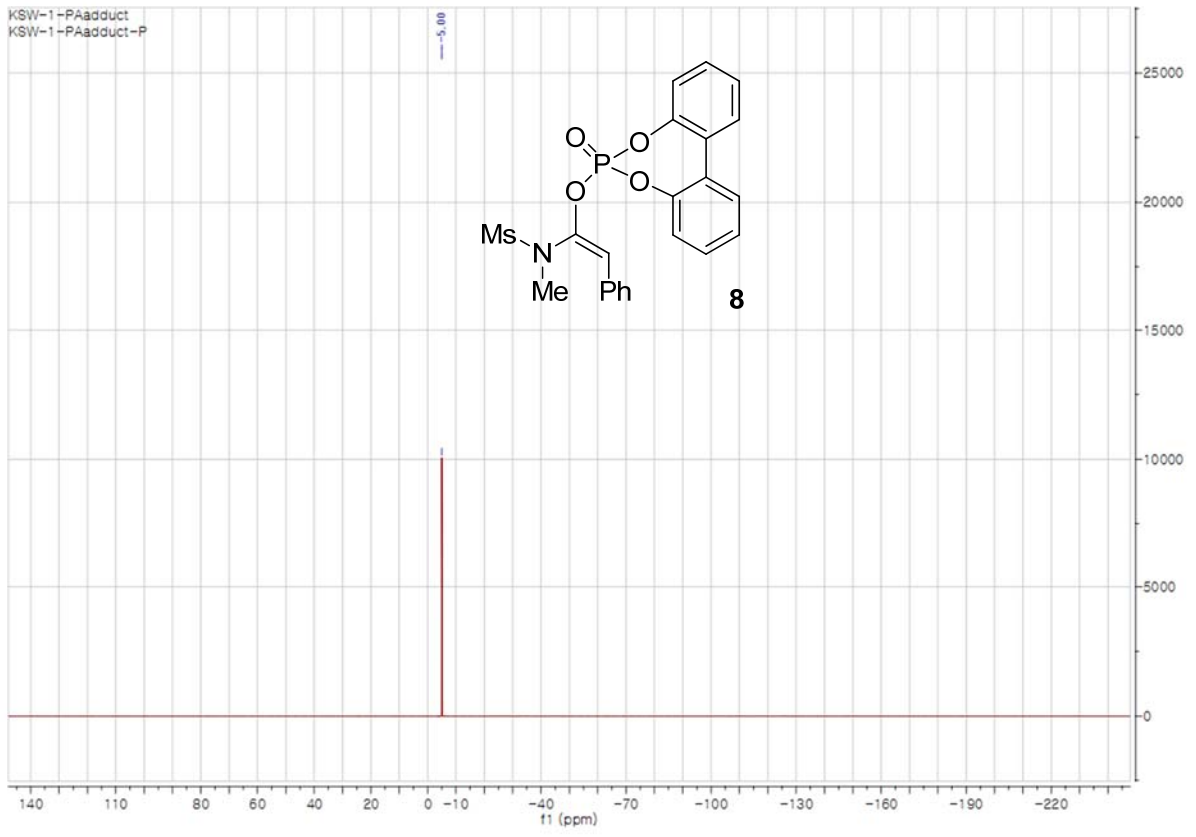

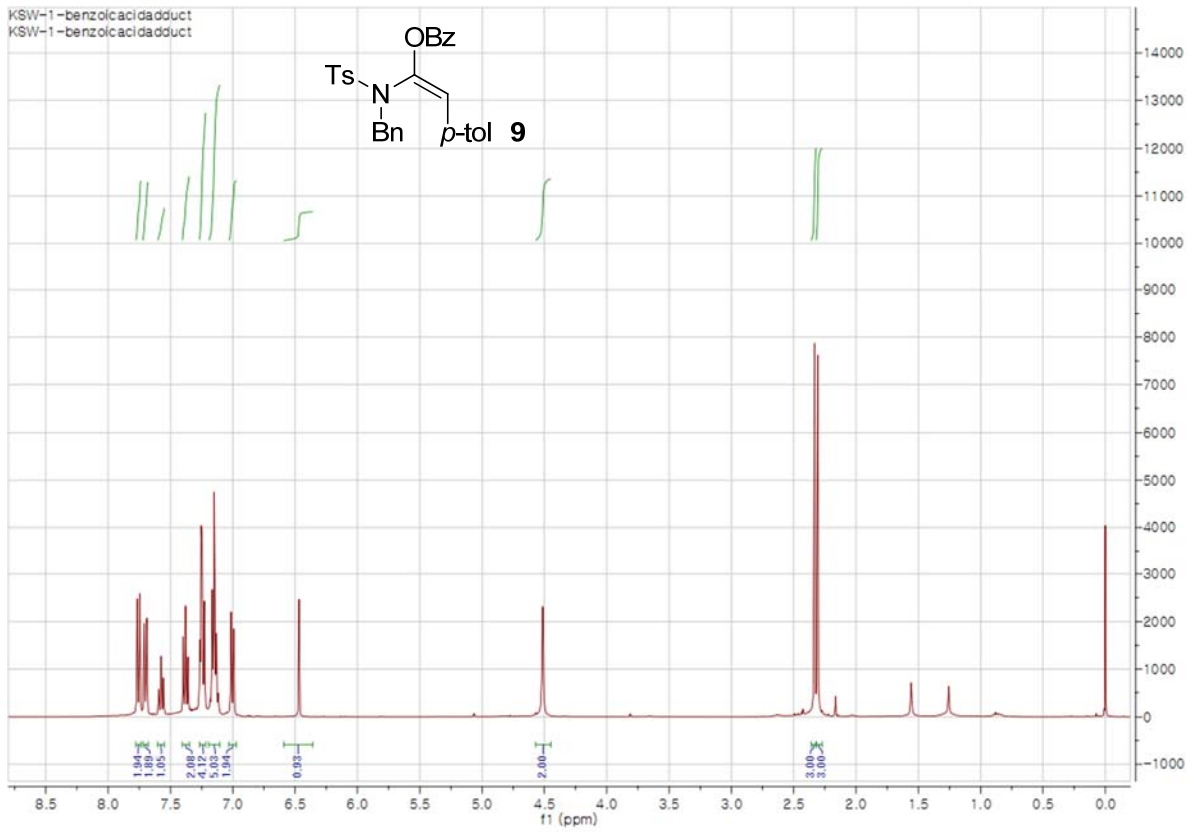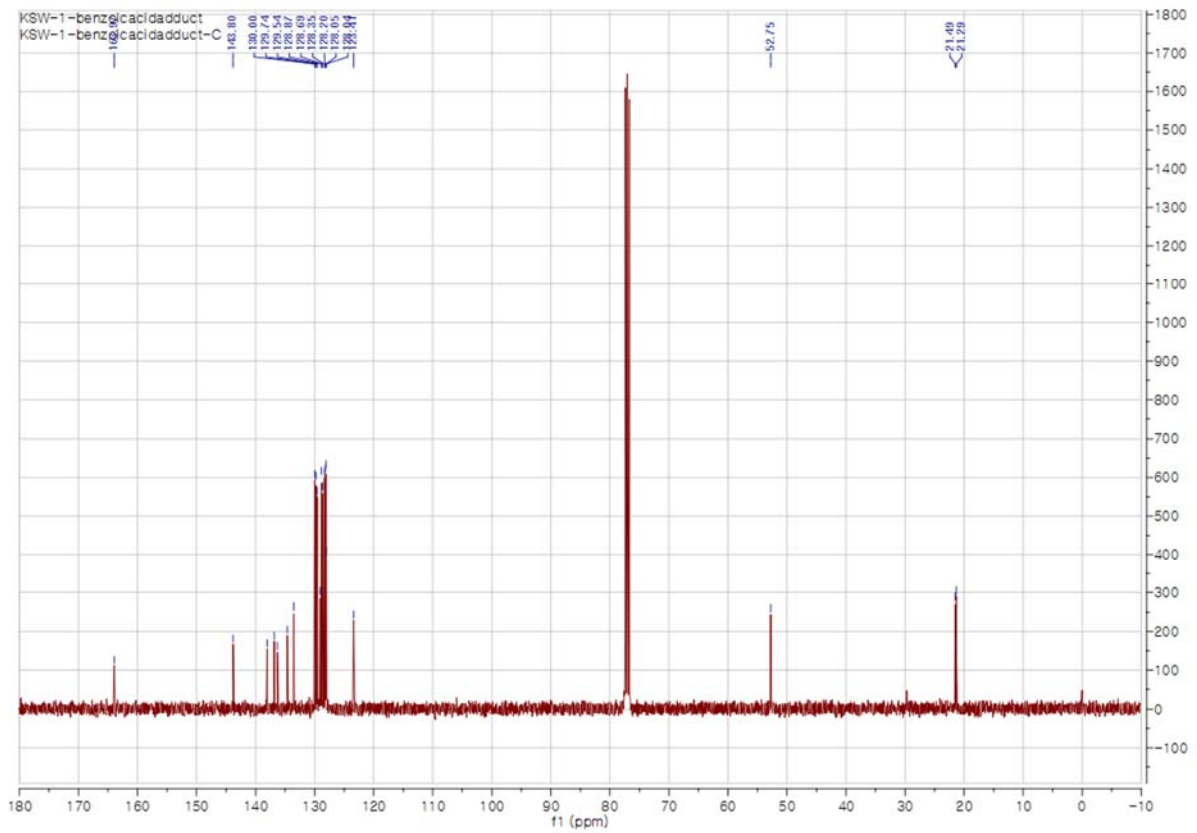

Supplement: c6cc10286g1.pdf [file c6cc10286g1.pdf]
